# Supplementary material for: Microbial Consortium Associated with the Antarctic Marine Ciliate Euplotes focardii: An Investigation from Genomic Sequences
Source: PubMed Central journal article supplement (PMC4494151; doi:10.1007/s00248-015-0568-9), 2015-02-24
Supplement: 248_2015_568_MOESM1_ESM.pdf [file 248_2015_568_MOESM1_ESM.pdf]

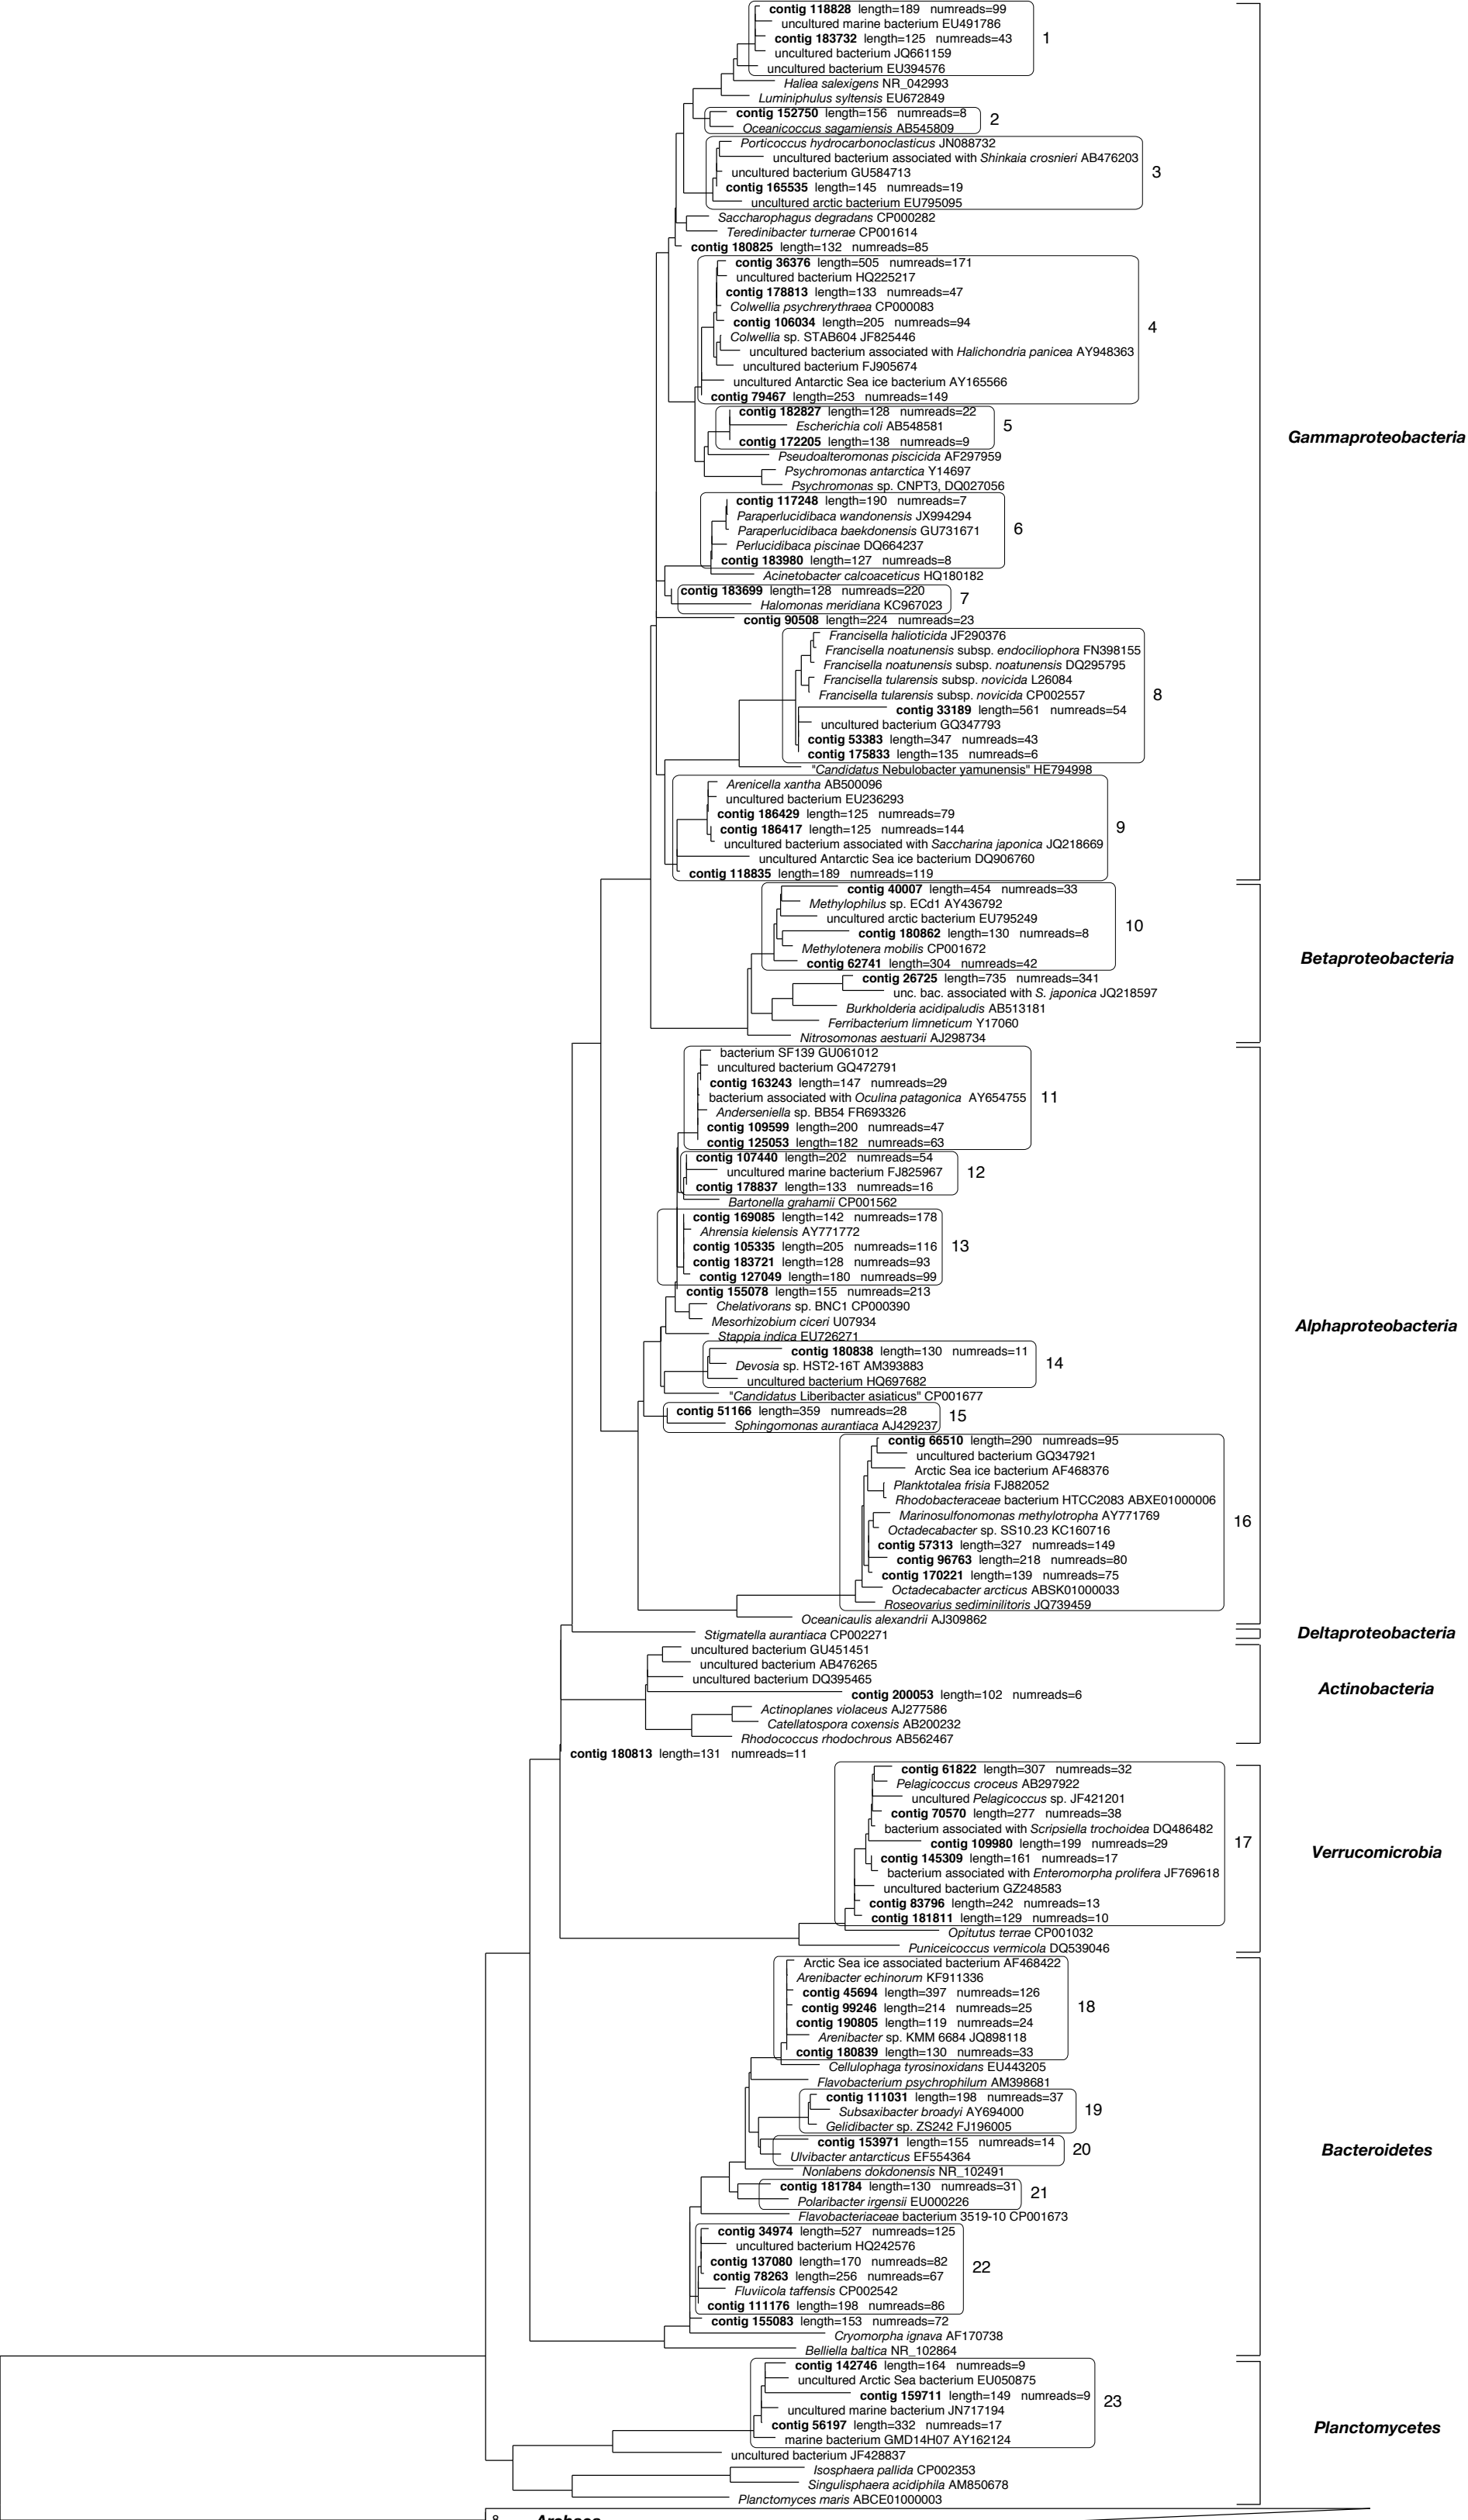

**Gammaproteobacteria**

**Betaproteobacteria**

**Alphaproteobacteria**

**Deltaproteobacteria**

**Actinobacteria**

**Verrucomicrobia**

**Bacteroidetes**

**Planctomycetes**
