# Supplementary material for: Microbial Consortium Associated with the Antarctic Marine Ciliate Euplotes focardii: An Investigation from Genomic Sequences
Source: PubMed Central journal article supplement (PMC4494151; doi:10.1007/s00248-015-0568-9), 2015-02-24
Supplement: 248_2015_568_MOESM7_ESM.pdf [file 248_2015_568_MOESM7_ESM.pdf]

Table S5: gene annotation of the contigs that showed a high similarity to sequences from representatives of the genus *Francisella*.

| Contigs                                                                                                                                                                                                                                                                                                                                                                                                                                                                                                                                                                                                                                                                                                                                                                                                                                                                                                                                                                                                                                                                                                                                                                                                                                                                                                                                                                                                                                                                                                                                                                                                                                                                                                                                                                                                                                                                                                                                                                                                   | Blastx                                                                                                                                                                                                                                                                                                                                                                                                                                                                                                                                                                                                                                                                                                                                                                                                                                                                                                                                                                                                                                                                       | Max score | Score | Query Cover | e-value  | Identity | Blastn                                                                                          | Score | Query Cover | e-value   | Identity |
|-----------------------------------------------------------------------------------------------------------------------------------------------------------------------------------------------------------------------------------------------------------------------------------------------------------------------------------------------------------------------------------------------------------------------------------------------------------------------------------------------------------------------------------------------------------------------------------------------------------------------------------------------------------------------------------------------------------------------------------------------------------------------------------------------------------------------------------------------------------------------------------------------------------------------------------------------------------------------------------------------------------------------------------------------------------------------------------------------------------------------------------------------------------------------------------------------------------------------------------------------------------------------------------------------------------------------------------------------------------------------------------------------------------------------------------------------------------------------------------------------------------------------------------------------------------------------------------------------------------------------------------------------------------------------------------------------------------------------------------------------------------------------------------------------------------------------------------------------------------------------------------------------------------------------------------------------------------------------------------------------------------|------------------------------------------------------------------------------------------------------------------------------------------------------------------------------------------------------------------------------------------------------------------------------------------------------------------------------------------------------------------------------------------------------------------------------------------------------------------------------------------------------------------------------------------------------------------------------------------------------------------------------------------------------------------------------------------------------------------------------------------------------------------------------------------------------------------------------------------------------------------------------------------------------------------------------------------------------------------------------------------------------------------------------------------------------------------------------|-----------|-------|-------------|----------|----------|-------------------------------------------------------------------------------------------------|-------|-------------|-----------|----------|
| <p>&gt;contig50994 length=360 numreads=13<br/>           CCAAGTGGTAACGAGCTTtAGGAAGAGTGTGTGACGCTCTGGTAACCAATTG<br/>           ATGGT<br/>           AAAGGTGAAGTTGCAACAGATCTTACATCTCTATTGAAAAATGACACTGGTG<br/>           TGATT<br/>           TGGAGAAAAATCAGTTGATCAAGCTTTACAAACAGGTATTAAGTCAATCGATTCA<br/>           ATGGTT<br/>           CCAATTGGCTGGACAGCGTGaaCTTATtATTGGTGATAGACAGATGgTAAAC<br/>           AGCA<br/>           ATCGCTGTAGACACAATCATTAAACAAAAAGATTCTGGTGAATGTTTTATG<br/>           TTGCT<br/>           ATAGGTCAAAAGCTTCAACAATTGCAACATTGTAAAGACAGTTAGAAGAGCAT<br/>           GATGCT<br/>           &gt;contig45579 length=399 numreads=28<br/>           CTGTAGTTACAGGCCATAAAGAACCTGTACGCCCAATTGATAAGTGCATCAG<br/>           CACTTG<br/>           CTGTTATAAAACCTTTATTCTCGTTACTATCCCACTCTAAAGCTCTTTTTCCA<br/>           AGC<br/>           ATATATTAgCCTAAAAACAGCACCACCAAAAAATAATATCCTCGAAAAACGCA<br/>           TGATT<br/>           AGATATAGCTGGCACTGTGACCAAGCTCTAAGGTTTATGCCCGAGGGAATAAT<br/>           AAATGC<br/>           CAGCTCCAAGTCAAAATatcAAAAATAACTGCTATTAATAAATCGTACATCA<br/>           AGCTT<br/>           CTCTCTTGATCACCAAAATGcAGGgAaGCCACACTCAAAAGTCTCTCTTTTGTCT<br/>           TACT<br/>           GGGATTGTTAGCCCACTATTACAGATAAACTTTACC<br/>           &gt;contig109648 length=200 numreads=30<br/>           CTGTCTCGAATTTCTCTGAGTTAGAACTCAAATAGTCAAGGGTGGTATTTCA<br/>           AGGTC<br/>           GACTCCAACAATCTAGCGACTGCTTCTCATAGTCTCCCACTATCTACACATAA<br/>           ATAT<br/>           TCAAAGTCCAGTCAAAGCTGTAGTAAAGTTACGGGgTCTTTCCGTCTAACCG<br/>           CGGGT<br/>           ACACAGCATCTTCACTGCGA<br/>           &gt;contig118995 length=188 numreads=8<br/>           GTCAATCATTACCATAAGATACCTGTTATAGCTGTAGACATGCGATAT<br/>           AAAT<br/>           TTTAGGCTGCTAGTTGTTAGTCAATTTATCTCTTTGTTTTACTGTTACAACAAC<br/>           TTG<br/>           AAGGACGCCAATTACAACAATATTAATCAAGGTGGAACCTCACAGGCAAAACC<br/>           TTGATT<br/>           TAAATATGG</p> | <p>ATP synthase F0F1 subunit alpha<br/>           [Francisella tularensis subsp. tularensis<br/>           SCHU S4]</p>                                                                                                                                                                                                                                                                                                                                                                                                                                                                                                                                                                                                                                                                                                                                                                                                                                                                                                                                                      | 229       | 229   | 100%        | 6,00E-70 | 95%      | Francisella cantonensis strain 08HL01032 ATP synthase F1 alpha subunit (AtpA) gene, partial cds | 292   | 94%         | 1,00E-75  | 82%      |
| <p>&gt;contig118995 length=188 numreads=8<br/>           GTCAATCATTACCATAAGATACCTGTTATAGCTGTAGACATGCGATAT<br/>           AAAT<br/>           TTTAGGCTGCTAGTTGTTAGTCAATTTATCTCTTTGTTTTACTGTTACAACAAC<br/>           TTG<br/>           AAGGACGCCAATTACAACAATATTAATCAAGGTGGAACCTCACAGGCAAAACC<br/>           TTGATT<br/>           TAAATATGG</p>                                                                                                                                                                                                                                                                                                                                                                                                                                                                                                                                                                                                                                                                                                                                                                                                                                                                                                                                                                                                                                                                                                                                                                                                                                                                                                                                                                                                                                                                                                                                                                                                                                                            | <p>NADH dehydrogenase I subunit A<br/>           [Francisella tularensis subsp. tularensis<br/>           SCHU S4]</p>                                                                                                                                                                                                                                                                                                                                                                                                                                                                                                                                                                                                                                                                                                                                                                                                                                                                                                                                                       | 172       | 172   | 68%         | 7,00E-52 | 93%      | Francisella cf. novicida 3523, complete genome 401                                              | 401   | 98%         | 2,00E-108 | 85%      |
| <p>&gt;contig84610 length=241 numreads=8<br/>           AaaGCCATTTTATGAGAAGAAGAAATAAAAAAGTTTTTATGAAAAAAGAGCAA<br/>           TGTTG<br/>           AGATCAATGTAGTACCATACATTGATGTAATGCTTATTACTAGTTATATTATG<br/>           ATTA<br/>           CCACGCCAATTTAAACACAGGGTGTAAAGTTGATTTGCCGAAAGCAACATCAG<br/>           AAAAA<br/>           TCCCATCAAATGATAGTAAACCAATAGTTGTACAGTCAATAAAGATGGTCAATA<br/>           TTTTA<br/>           T</p>                                                                                                                                                                                                                                                                                                                                                                                                                                                                                                                                                                                                                                                                                                                                                                                                                                                                                                                                                                                                                                                                                                                                                                                                                                                                                                                                                                                                                                                                                                                                                                     | <p>antirestriction protein [Francisella<br/>           philomiragia subsp. philomiragia ATCC<br/>           25017] &gt;ref WP_012281159.1 <br/>           antirestriction protein [Francisella<br/>           philomiragia] &gt;gb ABZ88118.1  putative<br/>           antirestriction protein [Francisella<br/>           philomiragia subsp. philomiragia ATCC<br/>           25017]<br/>           TolR protein [Francisella novicida U112]<br/>           &gt;ref YP_005825267.1  hypothetical protein<br/>           [Francisella cf. novicida Fx1]<br/>           &gt;ref WP_003035506.1  biopolymer<br/>           transporter TolR [Francisella novicida]<br/>           &gt;gb ABK89259.1  group A colicin<br/>           translocation; tolR protein [Francisella<br/>           novicida U112] &gt;gb EDN37182.1 <br/>           hypothetical protein FTDG_01591<br/>           [Francisella novicida GA99-3548]<br/>           &gt;gb AEB27307.1  Tol biopolymer transport<br/>           system, TolR protein [Francisella cf.<br/>           novicida Fx1]</p> | 62.0      | 62.0  | 33%         | 4,00E-10 | 93%      | Francisella cf. novicida 3523, complete genome                                                  | 261   | 74%         | 2,00E-66  | 92%      |
| <p>&gt;contig90166 length=230 numreads=11<br/>           AAGTACAGTTGCATAAGCCTTTTAAACATTGCAGCATTCAACAATCAGCTTGA<br/>           ATTGT<br/>           AGCAATTTCTTACTTGGCCAAATATCTGCAAGCATCATCATTGCCCTCAG<br/>           CATC<br/>           AACACCTATAGCATCTTACTGACTGCAAAATCAACTGTCCGACTAATGCATAA<br/>           GCAAC<br/>           CACATGAATAGGAGATGCAAGATAGTTAGCTTTTACATGAGGGTTAATAC</p>                                                                                                                                                                                                                                                                                                                                                                                                                                                                                                                                                                                                                                                                                                                                                                                                                                                                                                                                                                                                                                                                                                                                                                                                                                                                                                                                                                                                                                                                                                                                                                                                                 | <p>aconitate hydratase [Francisella<br/>           noatunensis subsp. orientalis LADL-07-<br/>           285A] &gt;gb AHB98943.1  aconitate<br/>           hydratase [Francisella noatunensis subsp.<br/>           orientalis LADL-07-285A]</p>                                                                                                                                                                                                                                                                                                                                                                                                                                                                                                                                                                                                                                                                                                                                                                                                                             | 138       | 138   | 67%         | 2,00E-35 | 86%      | Francisella cf. novicida 3523, complete genome                                                  | 198   | 68%         | 2,00E-47  | 82%      |
| <p>&gt;contig109648 length=200 numreads=30<br/>           CTGTCTCGAATTTCTCTGAGTTAGAACTCAAATAGTCAAGGGTGGTATTTCA<br/>           AGGTC<br/>           GACTCCAACAATCTAGCGACTGCTTCTCATAGTCTCCCACTATCTACACATAA<br/>           ATAT<br/>           TCAAAGTCCAGTCAAAGCTGTAGTAAAGTTACGGGgTCTTTCCGTCTAACCG<br/>           CGGGT<br/>           ACACAGCATCTTCACTGCGA<br/>           &gt;contig118995 length=188 numreads=8<br/>           GTCAATCATTACCATAAGATACCTGTTATAGCTGTAGACATGCGATAT<br/>           AAAT<br/>           TTTAGGCTGCTAGTTGTTAGTCAATTTATCTCTTTGTTTTACTGTTACAACAAC<br/>           TTG<br/>           AAGGACGCCAATTACAACAATATTAATCAAGGTGGAACCTCACAGGCAAAACC<br/>           TTGATT<br/>           TAAATATGG</p>                                                                                                                                                                                                                                                                                                                                                                                                                                                                                                                                                                                                                                                                                                                                                                                                                                                                                                                                                                                                                                                                                                                                                                                                                                                                                      | <p>Francisella cf. novicida 3523, ribosomal rRNA</p>                                                                                                                                                                                                                                                                                                                                                                                                                                                                                                                                                                                                                                                                                                                                                                                                                                                                                                                                                                                                                         | 917       |       | 88%         | 9,00E-80 | 94%      |                                                                                                 | 917   | 88%         | 9,00E-80  | 94%      |

|                                                                                                                                                                                                                                                                                                                                                                                                                                                                                                                                                                                                                                                                                                                                                                                                                                                                                              |                                                                                                                                                                                                                                                                                                                                                                                                                                                                                                                                                                         |      |      |     |          |     |                                                |     |     |          |     |
|----------------------------------------------------------------------------------------------------------------------------------------------------------------------------------------------------------------------------------------------------------------------------------------------------------------------------------------------------------------------------------------------------------------------------------------------------------------------------------------------------------------------------------------------------------------------------------------------------------------------------------------------------------------------------------------------------------------------------------------------------------------------------------------------------------------------------------------------------------------------------------------------|-------------------------------------------------------------------------------------------------------------------------------------------------------------------------------------------------------------------------------------------------------------------------------------------------------------------------------------------------------------------------------------------------------------------------------------------------------------------------------------------------------------------------------------------------------------------------|------|------|-----|----------|-----|------------------------------------------------|-----|-----|----------|-----|
| <p>&gt;contig157498 length=151 numreads=9<br/>GCATTAAACTCTAATATATCAAAGATATACCTCTAAACAACTACACCTCTAAAC<br/>TTTT<br/>ACTAAACATCTCAAAGACATTCTGTAGGATTGAAGCTTTGATTTCTCAAGA<br/>GCATT<br/>TTTCATCATAGCTGTCTATCAGATCATAG</p>                                                                                                                                                                                                                                                                                                                                                                                                                                                                                                                                                                                                                                                                        | <p>aminopeptidase [Francisella novicida]<br/>&gt;gb EDN35376.1  aminopeptidase N<br/>[Francisella novicida GA99-3549]</p>                                                                                                                                                                                                                                                                                                                                                                                                                                               | 70.5 | 70.5 | 55% | 3,00E-12 | 97% | Francisella cf. novicida 3523, complete genome | 158 | 54% | 2,00E-35 | 94% |
| <p>&gt;contig69126 length=281 numreads=13<br/>CTGCCGCTGAAGCAAATGAAGAAATGATGAAAAGTATCTTGAAGCGAAGAG<br/>CTTACAG<br/>AAGATGAAATTCATGAAGGCTGCGTCAGCGTGATCAATAaCGAAATCGTTC<br/>TTGCTT<br/>TCTGTGTTCTGCGTTTAAAGATAAAGGTTTCAGCGCTGACTTGTGTTAT<br/>CCGTT<br/>ATTTACCTGCTCAAACCAAGTCTCTGCAATTAAGTGAAGAACTGAAGATGGTGA<br/>GCCAG<br/>cTCAAGAAAGTCATCTGATGATGAGCCGTTCTCAGCTTTA<br/>&gt;contig135655 length=171 numreads=6<br/>TAGAGTACCAGCATATTCGCCTTTTTCAGTAGCGGAGCATACATTGGCGCTTTA<br/>TTATG<br/>CTTAAACCGTAAATACCAAAGCTTCAACAGAGTTCTGAAAGTAATTTTAAAT<br/>ATCGA<br/>AGGTTTAGAAGGATTTGATATTATCAAAAGACTATCGGAATTGTTGTTT</p>                                                                                                                                                                                                                                                                              | <p>elongation factor G [Francisella tularensis<br/>subsp. holarctica FTNF002-00]<br/>&gt;ref YP_007008412.1  elongation factor G<br/>[Francisella tularensis subsp. holarctica<br/>F92] &gt;ref WP_010030786.1  elongation<br/>factor G [Francisella tularensis]<br/>&gt;sp A7N954.1 EFG_FRATF RecName:<br/>Full=Elongation factor G; Short=EF-G<br/>&gt;gb ABU60727.1  translation elongation<br/>factor G [Francisella tularensis subsp.<br/>holarctica FTNF002-00] &gt;gb AFX69949.1 <br/>elongation factor G [Francisella tularensis<br/>subsp. holarctica F92]</p> | 143  | 143  | 63% | 2,00E-37 | 88% | Francisella cf. novicida 3523, complete genome | 209 | 66% | 1,00E-50 | 83% |
| <p>&gt;contig106755 length=203 numreads=8<br/>GCTTTAGTTAAAGAAAGCTTTAAATGCATCAGCATCATCAGAAGCCATTTTTGAA<br/>CTGG<br/>TTCATAAGGTCTGTGATTGCTCATAGCTTTTTCAAGTACAGCTGAGCTGAGC<br/>TTTA<br/>TCAGTGTTCAGCTTTATCTGCGTAGCAGCATCTTTTGCATcC-TTTTGCATCG<br/>TCA<br/>TTAGCAACATCATCTTCTCTTC</p>                                                                                                                                                                                                                                                                                                                                                                                                                                                                                                                                                                                                            | <p>D-lactate dehydrogenase [Francisella cf.<br/>novicida 3523] &gt;ref WP_014549102.1  D-<br/>lactate dehydrogenase [Francisella<br/>novicida] &gt;gb AEE27132.1  D-lactate<br/>dehydrogenase [Francisella cf. novicida<br/>3523]</p>                                                                                                                                                                                                                                                                                                                                   | 109  | 109  | 65% | 7,00E-27 | 96% | Francisella cf. novicida 3523, complete genome | 222 | 73% | 1,00E-54 | 90% |
| <p>&gt;contig182118 length=129 numreads=6<br/>TCGAGACCTTAATCTCCTGTACCTTGAGCACCACTAAACTTAGACATATCGTTGA<br/>TCTT<br/>ACTCTTCTATTTACCACCAGCTTTTTGATAGCTCTTTTCGCACCTTTTGTGCAAG<br/>CTA<br/>TACCCTGAA<br/>&gt;contig66300 length=290 numreads=13<br/>ATAAGTTGAGCAGCTAGTCTATCACCCATAGTGTTCCTTACGCTTACGCGCAGC<br/>ATCT<br/>ATGATCCATCTCATACCCAAGTTTGCAGCAGCTCAGGCTAACCTCTACAGGTA<br/>CTTGA<br/>TAAGTAGCACCAACACGACGAGATTAACTCAACATGCGGACTTATGCTTT<br/>CTAAA<br/>GCAGTTTCAAAAACCTCAACTCATTTAATGAAGCATCTTTAGCTTTAATTCTATC<br/>AAAC<br/>GCACCATAAACAATTTTTCAGCTACTGATTTTTACCATCTAGCATAAT<br/>&gt;contig95182 length=221 numreads=10<br/>TAAATACAGCTACTAAAGAAAGCTTACTAAGTCAAGTGTAGCAGATGACAGCCCTA<br/>ACGGTT<br/>TAATACTAGAAATgATGAGTTGATGGACTTTATACAGTCAGTTATTAGAGCTGA<br/>AAAAA<br/>TAGAAGACCATAAACTATAGTAGAGGCTTACAATAATGGAAGTTTCAAAGCA<br/>AAACAA<br/>TATCTAGGGGTaCTCAATATATAGATAATGTAACAATATCT</p> | <p>outer hypothetical protein [Francisella<br/>philomiragia subsp. philomiragia ATCC<br/>25017] &gt;ref WP_012280140.1  membrane<br/>protein [Francisella philomiragia]<br/>&gt;gb AB286928.1  conserved outer<br/>membrane protein of unknown function<br/>[Francisella philomiragia subsp.<br/>philomiragia ATCC 25017]</p>                                                                                                                                                                                                                                           | 100  | 100  | 66% | 6,00E-24 | 81% | Francisella cf. novicida 3523, complete genome | 163 | 65% | 8,00E-37 | 82% |
| <p>&gt;contig66300 length=290 numreads=13<br/>ATAAGTTGAGCAGCTAGTCTATCACCCATAGTGTTCCTTACGCTTACGCGCAGC<br/>ATCT<br/>ATGATCCATCTCATACCCAAGTTTGCAGCAGCTCAGGCTAACCTCTACAGGTA<br/>CTTGA<br/>TAAGTAGCACCAACACGACGAGATTAACTCAACATGCGGACTTATGCTTT<br/>CTAAA<br/>GCAGTTTCAAAAACCTCAACTCATTTAATGAAGCATCTTTAGCTTTAATTCTATC<br/>AAAC<br/>GCACCATAAACAATTTTTCAGCTACTGATTTTTACCATCTAGCATAAT<br/>&gt;contig95182 length=221 numreads=10<br/>TAAATACAGCTACTAAAGAAAGCTTACTAAGTCAAGTGTAGCAGATGACAGCCCTA<br/>ACGGTT<br/>TAATACTAGAAATgATGAGTTGATGGACTTTATACAGTCAGTTATTAGAGCTGA<br/>AAAAA<br/>TAGAAGACCATAAACTATAGTAGAGGCTTACAATAATGGAAGTTTCAAAGCA<br/>AAACAA<br/>TATCTAGGGGTaCTCAATATATAGATAATGTAACAATATCT</p>                                                                                                                                                                                                   | <p>50S ribosomal protein L15 [Francisella<br/>tularensis subsp. mediasiatica FSC147]<br/>&gt;ref WP_012429815.1  50S ribosomal<br/>protein L15 [Francisella tularensis]<br/>&gt;sp B25DW6.1 RL15_FRATM RecName:<br/>Full=50S ribosomal protein L15<br/>&gt;gb ACD31330.1  50S ribosomal protein<br/>L15 [Francisella tularensis subsp.<br/>mediasiatica FSC147]</p>                                                                                                                                                                                                     | 40.0 | 40.0 | 33% | 0.011    | 90% | Francisella cf. novicida 3523, complete genome | 115 | 52% | 1,00E-22 | 89% |
| <p>&gt;contig95182 length=221 numreads=10<br/>TAAATACAGCTACTAAAGAAAGCTTACTAAGTCAAGTGTAGCAGATGACAGCCCTA<br/>ACGGTT<br/>TAATACTAGAAATgATGAGTTGATGGACTTTATACAGTCAGTTATTAGAGCTGA<br/>AAAAA<br/>TAGAAGACCATAAACTATAGTAGAGGCTTACAATAATGGAAGTTTCAAAGCA<br/>AAACAA<br/>TATCTAGGGGTaCTCAATATATAGATAATGTAACAATATCT</p>                                                                                                                                                                                                                                                                                                                                                                                                                                                                                                                                                                                 | <p>30S ribosomal protein S7 [Francisella sp.<br/>TX077308] &gt;ref WP_013922016.1  30S<br/>ribosomal protein S7 [Francisella sp.<br/>TX077308] &gt;gb AEI35157.1  SSU ribosomal<br/>protein S7p (S5e) [Francisella sp. TX077308]</p>                                                                                                                                                                                                                                                                                                                                    | 183  | 183  | 84% | 1,00E-56 | 92% | Francisella cf. novicida 3523, complete genome | 316 | 82% | 7,00E-83 | 87% |
| <p>&gt;contig95182 length=221 numreads=10<br/>TAAATACAGCTACTAAAGAAAGCTTACTAAGTCAAGTGTAGCAGATGACAGCCCTA<br/>ACGGTT<br/>TAATACTAGAAATgATGAGTTGATGGACTTTATACAGTCAGTTATTAGAGCTGA<br/>AAAAA<br/>TAGAAGACCATAAACTATAGTAGAGGCTTACAATAATGGAAGTTTCAAAGCA<br/>AAACAA<br/>TATCTAGGGGTaCTCAATATATAGATAATGTAACAATATCT</p>                                                                                                                                                                                                                                                                                                                                                                                                                                                                                                                                                                                 | <p>hypothetical protein Fphi_0982 [Francisella<br/>philomiragia subsp. philomiragia ATCC<br/>25017] &gt;ref WP_012280381.1  hypothetical<br/>protein [Francisella philomiragia]<br/>&gt;gb AB287206.1  conserved hypothetical<br/>protein [Francisella philomiragia subsp.<br/>philomiragia ATCC 25017]</p>                                                                                                                                                                                                                                                             | 147  | 147  | 79% | 1,00E-39 | 96% | Francisella cf. novicida 3523, complete genome | 311 | 79% | 2,00E-81 | 92% |

|                                                                                                                                                                                                                                                                                                                                                                                                                                                                                                                                                                                                                                                                                                                                                                                                                                                                                                                                                                                                                                                                                                                                                                                                                                                                                                                                                                                                                                                                                                                                                                                                                                                                                                                                                                                                                                                                                                                                                                                                                                                                                                                                                                                                                                                                                                                                                                                                 |                                                                                                                                                                                                                                                                                                 |     |     |          |      |                                                |                                                |      |          |          |     |
|-------------------------------------------------------------------------------------------------------------------------------------------------------------------------------------------------------------------------------------------------------------------------------------------------------------------------------------------------------------------------------------------------------------------------------------------------------------------------------------------------------------------------------------------------------------------------------------------------------------------------------------------------------------------------------------------------------------------------------------------------------------------------------------------------------------------------------------------------------------------------------------------------------------------------------------------------------------------------------------------------------------------------------------------------------------------------------------------------------------------------------------------------------------------------------------------------------------------------------------------------------------------------------------------------------------------------------------------------------------------------------------------------------------------------------------------------------------------------------------------------------------------------------------------------------------------------------------------------------------------------------------------------------------------------------------------------------------------------------------------------------------------------------------------------------------------------------------------------------------------------------------------------------------------------------------------------------------------------------------------------------------------------------------------------------------------------------------------------------------------------------------------------------------------------------------------------------------------------------------------------------------------------------------------------------------------------------------------------------------------------------------------------|-------------------------------------------------------------------------------------------------------------------------------------------------------------------------------------------------------------------------------------------------------------------------------------------------|-----|-----|----------|------|------------------------------------------------|------------------------------------------------|------|----------|----------|-----|
| >contig13758 length=1492 numreads=222<br>TCTAAATAAGAAAAATGATACTGTAACGACTCAGCTAAAAACAaGCCATA<br>CGTCTC<br>ATGGAAGACGAGGGTCAGGACGGATACTTCATTCGCGTTGGCGTTGAGGGGGG<br>AGGATGT<br>TCTGGATTGATGTACAAATGGACTTCGATAACGAGCATAAAGAAACAGACAAA<br>TCGTTT<br>GAAGACAACGGAATTGAAGTTGTTGTAGACAAAAAAGCTTTTATACCTCGTT<br>GGAACG<br>ACTCTAGATTTTTCTGGAGGACTGAATGGCAAAGGCTTCATATTTGTAACCCGA<br>ATGCG<br>GATAGAACCTCGGGATGTTGGTAATCATTTTCAATATAATCGGAATATGTCAAA<br>TTATA<br>CGAAACGAAATTAGCAAAGACCTTGAAGACCAAGAAATGAATTTGGTTTTA<br>CAACAG<br>ATATTGAATCTGACAAGATTCCTAAAGGACTTAGTGAAGAAGTAATCGATTTAT<br>TTCTG<br>CTAAAAAAGAAAGAGCCGAATGGCTGCTTGATTTAGGCTGGAATCTTATCGTA<br>AGTGGC<br>AAGACATGATCGAACCAAGATGGCGCACGTTTATTACGAAACAGACTTTC<br>AAGATA<br>TAAGCTATTATTCTCTCAAAGCAGACTAAAAAATACGAGAGTTGGGATGATG<br>TTGATC<br>CTGAGATGAAGGAGACCATGAAAAAGTTGGGAATCTCGATGGAAGAGCAAAA<br>CGCCTTA<br>CTGGAACGAACGTCGAGTTCGTTGTTGTTGTTGTTGTTGTTGTTGTTGTTGTTG<br>>contig57016 length=328 numreads=14<br>TTTAACTCTGTCAGCTAAATCTCCATACCAACaCATCTGCCAGCTCTTTAGC<br>TGC<br>TTCTGCTGCAGGACCTTAGCAAATACTGCAACTCTTACAGATTACCAAGTCCAT<br>TaG<br>AAGTACAGACGACCTCACTACTCTGATCAGATTACGTTGATCTACACCCAAA<br>GCAAC<br>TGAACATCTACCCGCcCAACAACCTTAACGAGAAGTAAGCTTTTAAAGATACCA<br>AATGC<br>TTCTAGCAGAACTCTTTTTCAGCTCAACTTAGCAGCGATATTTTTCATTCT<br>TTT<br>AGATAATTAGACATTATTCACTCCCT<br>>contig105103 length=206 numreads=8<br>ATTTAGAGGCAAGAGTTTAGCTAAAACCTCTGATCGTAGAGTGGGCTTCT<br>GTGGTG<br>ATGGTGAATGGATGAACAGAGTCAATGGTCTATCAACAAGAGCTGGTCGAG<br>AAGGTT<br>TAGATAACCTTATATTGTAGTGAAGTGAATTTACAAGACTAGATGGTCTTGT<br>AAACG<br>GTAATGGTAATTTGTTGAAGAATTA<br>>contig93901 length=223 numreads=7<br>ATCTCTTGCAAGATTTTAACTTACCAGTGTCGTTGATCTATTTCGCGACCAG<br>TTTT<br>TTCTGCAATACCTttACAGTAGAACCCACGACCAACAACATCTTAACTTAGC<br>TGG<br>TTTGTAGTtATAACATGAATTTGAGGAGCAACATTAGAAACAGTTCTTTATGTT<br>CTTT<br>AATTACTTATTATAATACCAAGTATATGTAATCTACCACTA<br>>contig163622 length=146 numreads=6<br>GTTTCTGTATGCTTGGGCTTTTTAAAAGTTAAAATACCTGAAAAAATATATA<br>CATA<br>CCCATATCTATAGCTTTGTTCCATATCGTAATCTCAGTAAAGCAATGCAGTAT<br>TCCG<br>CCACATTTTTCTACATTTTCAGATTT<br><br>>contig93979 length=223 numreads=11<br>TAAGATTCAAAAATCCTATCGACGGTATGTAAGCTGGGATGATGCCGTAAGG<br>GTAGAA<br>TTACAATGCAAAAACAGGCTGATGATGATGATGATGATGATGATGATGATGATG<br>GCCCAA<br>CATATACTTTGTTAGTTGTTGATGATGATGATGATGATGATGATGATGATGATG<br>CGTG<br>GTGATGATCATGTAATAACTCTCAAGCAAAATAATATTA | Iron-regulated ABC transporter membrane component SufB [Fluviicola taffensis DSM 16823] >ref WP_013686844.1  cysteine desulfurase activator complex subunit SufB [Fluviicola taffensis] >gb AEA44074.1  Iron-regulated ABC transporter membrane component SufB [Fluviicola taffensis DSM 16823] | 686 | 686 | 68%      | 0.0  | 86%                                            | Francisella cf. novicida 3523, complete genome | 283  | 34%      | 4,00E-72 | 76% |
| 50S ribosomal protein L1 [Francisella philomiragia subsp. philomiragia ATCC 25017] >ref WP_012280432.1  50S ribosomal protein L1 [Francisella philomiragia] >sp B0TX07.1 RL1_FRAP2 RecName: Full=50S ribosomal protein L1 >gb ABZ87265.1  50S ribosomal protein L1 [Francisella philomiragia subsp. philomiragia ATCC 25017]                                                                                                                                                                                                                                                                                                                                                                                                                                                                                                                                                                                                                                                                                                                                                                                                                                                                                                                                                                                                                                                                                                                                                                                                                                                                                                                                                                                                                                                                                                                                                                                                                                                                                                                                                                                                                                                                                                                                                                                                                                                                    | 138                                                                                                                                                                                                                                                                                             | 138 | 82% | 1,00E-37 | 84%  | Francisella cf. novicida 3523, complete genome | 270                                            | 85%  | 6,00E-69 | 82%      |     |
| pyruvate dehydrogenase [Francisella philomiragia] >gb EET20950.1  pyruvate dehydrogenase subunit E1 [Francisella philomiragia subsp. philomiragia ATCC 25015]                                                                                                                                                                                                                                                                                                                                                                                                                                                                                                                                                                                                                                                                                                                                                                                                                                                                                                                                                                                                                                                                                                                                                                                                                                                                                                                                                                                                                                                                                                                                                                                                                                                                                                                                                                                                                                                                                                                                                                                                                                                                                                                                                                                                                                   | 147                                                                                                                                                                                                                                                                                             | 147 | 72% | 7,00E-39 | 100% | Francisella cf. novicida 3523, complete genome | 248                                            | 71%  | 2,00E-62 | 89%      |     |
| polynucleotide phosphorylase [Francisella tularensis subsp. tularensis SCHU 54]                                                                                                                                                                                                                                                                                                                                                                                                                                                                                                                                                                                                                                                                                                                                                                                                                                                                                                                                                                                                                                                                                                                                                                                                                                                                                                                                                                                                                                                                                                                                                                                                                                                                                                                                                                                                                                                                                                                                                                                                                                                                                                                                                                                                                                                                                                                 | 137                                                                                                                                                                                                                                                                                             | 137 | 75% | 2,00E-35 | 88%  | Francisella cf. novicida 3523, complete genome | 195                                            | 68%  | 3,00E-46 | 84%      |     |
| deoxyribonuclease YcfH [Francisella sp. TX077308] >ref WP_013922675.1  TatD family hydrolase [Francisella sp. TX077308] >gb AEI35837.1  Putative deoxyribonuclease YcfH [Francisella sp. TX077308]                                                                                                                                                                                                                                                                                                                                                                                                                                                                                                                                                                                                                                                                                                                                                                                                                                                                                                                                                                                                                                                                                                                                                                                                                                                                                                                                                                                                                                                                                                                                                                                                                                                                                                                                                                                                                                                                                                                                                                                                                                                                                                                                                                                              | 101                                                                                                                                                                                                                                                                                             | 101 | 98% | 9,00E-25 | 96%  | Francisella cf. novicida 3523, complete genome | 176                                            | 100% | 4,00E-41 | 88%      |     |
| glutamyl-tRNA synthetase [Francisella sp. TX077308] >ref WP_013922001.1  glutaminyl-tRNA synthetase [Francisella sp. TX077308] >gb AEI35141.1  Glutamyl-tRNA synthetase [Francisella sp. TX077308]                                                                                                                                                                                                                                                                                                                                                                                                                                                                                                                                                                                                                                                                                                                                                                                                                                                                                                                                                                                                                                                                                                                                                                                                                                                                                                                                                                                                                                                                                                                                                                                                                                                                                                                                                                                                                                                                                                                                                                                                                                                                                                                                                                                              | 145                                                                                                                                                                                                                                                                                             | 145 | 87% | 1,00E-39 | 92%  | Francisella cf. novicida 3523, complete genome | 171                                            | 84%  | 3,00E-39 | 83%      |     |

|                                                                                                                                                                                                                                                                                                                                                                                                                                                                                                                                                           |                                                                                                                                                                                                                                                                                                                                                                                                                                                                                                                               |      |      |     |          |      |                                                |      |     |          |     |
|-----------------------------------------------------------------------------------------------------------------------------------------------------------------------------------------------------------------------------------------------------------------------------------------------------------------------------------------------------------------------------------------------------------------------------------------------------------------------------------------------------------------------------------------------------------|-------------------------------------------------------------------------------------------------------------------------------------------------------------------------------------------------------------------------------------------------------------------------------------------------------------------------------------------------------------------------------------------------------------------------------------------------------------------------------------------------------------------------------|------|------|-----|----------|------|------------------------------------------------|------|-----|----------|-----|
| >contig171911 length=139 numreads=6<br>TGTGCTAAAGCGTAAATAGTAATATTACAGCTGGTATGGACATGACTATTGG<br>TGAATT<br>TGAAGAAGTTGGTGAAGTTATTATGATCATTTATTCTGATGATGCTATTGTTATT<br>GCCGG<br>TACTGTGATTGATATGGAT                                                                                                                                                                                                                                                                                                                                                          | cell division protein FtsZ [Francisella<br>novicida] >gb EDX18862.1  tubulin/FtsZ<br>family protein [Francisella tularensis subsp.<br>novicida FTE]                                                                                                                                                                                                                                                                                                                                                                           | 84.7 | 84.7 | 64% | 1,00E-18 | 93%  | Francisella cf. novicida 3523, complete genome | 158  | 62% | 3,00E-35 | 88% |
| >contig182107 length=129 numreads=6<br>AAAAAGATGTGATGGAGTTTTGCTTATAAACCATCCGCTTGTTGCCAATATG<br>TGATC<br>AAGGTGGTGGAGTGAGCTGCAAGATATAGCGATGGTTTACGGTAAACGCACA<br>TCTGACT<br>ATAAAGAGT                                                                                                                                                                                                                                                                                                                                                                      | NADH dehydrogenase subunit G<br>[Francisella noatunensis subsp. orientalis<br>str. Toba 04] >ref YP_008893902.1  NADH<br>dehydrogenase subunit G [Francisella<br>noatunensis subsp. orientalis LADL-07-<br>285A] >ref WP_014714597.1  NADH<br>dehydrogenase subunit G [Francisella<br>noatunensis] >gb AFJ43052.1  NADH<br>dehydrogenase subunit G [Francisella<br>noatunensis subsp. orientalis str. Toba 04]<br>>gb AHB98989.1  NADH dehydrogenase<br>subunit G [Francisella noatunensis subsp.<br>orientalis LADL-07-285A] | 93.6 | 93.6 | 86% | 1,00E-20 | 91%  | Francisella cf. novicida 3523, complete genome | 154  | 81% | 2,00E-34 | 89% |
| >contig162313 length=147 numreads=9<br>AGAACTATGCTTCCACTTCTATGTCAGCAGATCATAGAGTAATTGGAGCGT<br>TAGCT<br>GCTAAGTTCTGACTAGATATAATCAGATTCTTCTGATTACGCCGAAATATAAT<br>GTAA<br>ATTCAATATTAGCGGAGTTTAAAAA                                                                                                                                                                                                                                                                                                                                                         | dihydroliipoamide acetyltransferase<br>component of pyruvate dehydrogenase<br>complex [Francisella sp. TX077308]<br>>ref WP_013922551.1  dihydroliipoamide<br>acetyltransferase [Francisella sp. TX077308]<br>>gb AEI35711.1  Dihydroliipoamide<br>acetyltransferase component of pyruvate<br>dehydrogenase complex [Francisella sp.<br>TX077308]                                                                                                                                                                             | 79.0 | 79.0 | 59% | 5,00E-16 | 97%  | Francisella cf. novicida 3523, complete genome | 154  | 61% | 3,00E-34 | 89% |
| >contig126626 length=180 numreads=9<br>AAGCGGATGTTTATTAGAAGCAGGACTTTACTTGTATGAAAATCTGTTGAGTTA<br>CTTG<br>ATGATAATGCTATTGATATGATCAAACTAGATGCCAAATGCTGTAATACTCGT<br>CGTG<br>GACTATGTGCTACTTGTATGGCTGCTGCTGGCTGCTGAGAGAAAAGATAAAG<br>TTGGTG<br>>contig84111 length=241 numreads=12<br>IATCAGAAACTTTAGCACCAACAGATCTGAAAATGACTCTGTATTGTTTC<br>AAAA<br>GCTGTAGATATGCAAAAGCTTTATGATGCAACACTTGATACAGCATTGTAAaTTC<br>CTAAT<br>GACAGTATTCTTCTTATGACATCAGAGACTGATAAGGTAGAAAGTCACTAAA<br>AAGTTT<br>GCAGATGCGAAGGtTAATAGGTGATAAGTCCGACTTATTGGTAGTATAGCAA<br>cAaGT<br>G | DNA-directed RNA polymerase subunit<br>beta' [Francisella sp. TX077308]<br>>ref WP_013922414.1  DNA-directed RNA<br>polymerase subunit beta' [Francisella sp.<br>TX077308] >gb AEI35571.1  DNA-directed<br>RNA polymerase beta' subunit [Francisella<br>sp. TX077308]                                                                                                                                                                                                                                                         | 84.0 | 84.0 | 85% | 1,00E-16 | 85%  | Francisella cf. novicida 3523, complete genome | 147  | 75% | 6,00E-32 | 83% |
| >contig177855 length=132 numreads=6<br>AttttTAATGATATTTAATACATTTCCGCCATTAATGGTTCAAATAGAGCTTATCA<br>GA<br>AGTATCATAATCAGTTGAAACTGTCTCAGGATTACAGTTAATCATAATAGTTTCA<br>ATACT<br>CTCTCAGCTAA                                                                                                                                                                                                                                                                                                                                                                  | universal stress protein [Francisella<br>philomiragia subsp. philomiragia ATCC<br>25017] >ref WP_012280178.1  universal<br>stress protein [Francisella philomiragia]<br>>gb AB286969.1  universal stress protein<br>[Francisella philomiragia subsp.<br>philomiragia ATCC 25017]                                                                                                                                                                                                                                              | 127  | 127  | 78% | 1,00E-33 | 74%  | Francisella cf. novicida 3523, complete genome | 147  | 67% | 8,00E-32 | 79% |
| >contig173680 length=137 numreads=6<br>TATTTTGCCAGAGTCCAAACCATTTGCTTGATGATGTTGAGCATTACTTTTTAGT<br>AGTG<br>CTGTAGTCTAGCTAAACGCTCTTTTTAACTCCATAGGAGTATCATCTGGTAA<br>TCTG<br>CAGCTGGAGTACCAGGG                                                                                                                                                                                                                                                                                                                                                               | hypothetical protein [Francisella cf.<br>novicida Fx1] >ref WP_014549144.1 <br>carbamoyl phosphate synthase large<br>subunit [Francisella novicida]<br>>gb AEB26974.1  Carbamoyl-phosphate<br>synthase large chain [Francisella cf.<br>novicida Fx1]<br>hypothetical protein [Francisella cf.<br>novicida Fx1] >ref WP_014549887.1 <br>(dimethylallyl)adenosine tRNA<br>methylthiotransferase [Francisella<br>novicida] >gb AE87490.1  tRNA-(6)A37<br>methylthiotransferase [Francisella cf.<br>novicida Fx1]                 | 89.0 | 128  | 62% | 1,00E-18 | 95%  | Francisella cf. novicida 3523, complete genome | 139  | 59% | 9,00E-30 | 87% |
| >contig152911 length=155 numreads=7<br>TTAATTCATATGCTATCAGATTCAGCAGGTGATTTAGTGAGCTAAACATAGACT<br>aTCCA<br>TTTCCATTTTATAGTACAGGATTACAGTTTGTATTATTTTAAATGGAAATAT<br>TGTT<br>GGTACGCTATCTAAAAATAAAGGTAATCTATC<br>>contig168055 length=142 numreads=6<br>TAATAAGAATACATGAAAaGAAGTTTATAGTAAAGGTTACTTATTATGGTAAC<br>AACGG<br>TTTTAATGTAATAATCTGTGTAGCATTATTTTCGAGTCCAAATGGTTTTAT<br>GATG<br>CAGCAAATGTTGTGCAACACC                                                                                                                                               | ZIP family zinc transporter [Francisella sp.<br>TX077308] >ref WP_013923135.1  zinc<br>transporter [Francisella sp. TX077308]<br>>gb AEI36302.1  Zinc transporter, ZIP<br>family [Francisella sp. TX077308]                                                                                                                                                                                                                                                                                                                   | 99.0 | 99.0 | 86% | 9,00E-24 | 92%  | Francisella cf. novicida 3523, complete genome | 122  | 88% | 7,00E-25 | 81% |
|                                                                                                                                                                                                                                                                                                                                                                                                                                                                                                                                                           | inorganic phosphate transporter (PiT)<br>family protein, partial [Francisella<br>tularensis]                                                                                                                                                                                                                                                                                                                                                                                                                                  | 38.5 | 38.5 | 26% | 0.094    | 100% | Francisella cf. novicida 3523, complete genome | 97.1 | 31% | 5,00E-17 | 95% |

|                                                                                                                                                                                                                                                                                                                                                                                                         |                                                                                                                                                                                                                                                                                                                                                                                 |      |      |     |          |     |                                                |      |     |          |     |
|---------------------------------------------------------------------------------------------------------------------------------------------------------------------------------------------------------------------------------------------------------------------------------------------------------------------------------------------------------------------------------------------------------|---------------------------------------------------------------------------------------------------------------------------------------------------------------------------------------------------------------------------------------------------------------------------------------------------------------------------------------------------------------------------------|------|------|-----|----------|-----|------------------------------------------------|------|-----|----------|-----|
| >contig129188 length=177 numreads=8<br>TACTAATATAGTAGCTTATTCaGGAACCTCATGATAATAACACGCTGAAAGGCTGG<br>TATGA<br>TGATTTAAGTAAGTgCAACGAAAACCTTCAAGAggATTTTCAAAGCTAATGAT<br>AAAAA<br>TATCATCTCAAAAATATAAAATACATGTGTTTCATGTAATGCTGATATGTAATAG<br>T                                                                                                                                                              | 4-alpha-glucanotransferase [Francisella<br>novicida] >gb [EDN37315.1] hypothetical<br>protein FTDG_00097 [Francisella novicida<br>GA99-3548]                                                                                                                                                                                                                                    | 95.1 | 95.1 | 88% | 3,00E-21 | 73% | Francisella cf. novicida 3523, complete genome | 80.5 | 58% | 5,00E-12 | 79% |
| >contig92365 length=226 numreads=8<br>CAGATTCAATTGAAACAGTGTCTGCCACTGGTATGATGGTTAGTTTCAAT<br>ACCTG<br>GTTGGTAAAAAATGCTGGCTGTATGATGGCTTTAGGACGATTAATAGAC<br>CTGGAT<br>TTGTTATATATGGTGTACAATTCAAGCTGGCATAATGCGTGGTAAACCAATAG<br>ATATCG<br>TTACTGCTTTCCAAAGTTATGGAGCATGCTTATCTGGTAGTATCAC                                                                                                                   | dihydroxy-acid dehydratase [Francisella<br>noatunensis subsp. orientalis str. Toba 04]<br>>ref [WP_014715277.1] dihydroxy-acid<br>dehydratase [Francisella noatunensis]<br>>gb [AFJ43747.1] dihydroxy-acid<br>dehydratase [Francisella noatunensis<br>subsp. orientalis str. Toba 04]                                                                                           | 158  | 158  | 64% | 5,00E-44 | 97% | Francisella cf. novicida Fx1, complete genome  | 235  | 65% | 2,00E-58 | 85% |
| >contig114906 length=193 numreads=10<br>TCACATACTAGGTGACAGCCATATAATACTAAAAATACTGCTAGAGATAGTTTT<br>ATAAC<br>TGCTTTAGTACTGGTGGTGAAGGTTATCATAATTACCCATGCTTTGCTGGT<br>GACTA<br>TAGAAAATGGTATTAGATGGTTGATTTGATCCTCTAAATGGCTTATCGCAGGT<br>TTAGC<br>TAAAATAGGCTGG                                                                                                                                              | fatty acid desaturase [Francisella sp.<br>TX077308] >ref [WP_013922417.1] fatty<br>acid desaturase [Francisella sp. TX077308]<br>>gb [AEI35574.1] Fatty acid desaturase;<br>Delta-9 fatty acid desaturase [Francisella<br>sp. TX077308]                                                                                                                                         | 126  | 126  | 79% | 7,00E-33 | 88% | Francisella cf. novicida Fx1, complete genome  | 191  | 79% | 3,00E-45 | 85% |
| >contig56997 length=328 numreads=15<br>TGTAACGCATCTATTGATGGTGACGATATTGTTTATCATAACTATTTGACATAA<br>GTAT<br>AGCAGTTGGTACAGACCGAGGCTTAGTTGTTCTGTTGAAAGATGTTGATGA<br>TATGAG<br>TTTGGCAGATTAGAAAATGCTGTAGTTGATAAGGCTATTAAAGCCAGGGATGG<br>TAAACT<br>AACTCTTGAAGATATGCAAGGTGTACATTACTACTAATGGTGGTACTTAT<br>GGTTC<br>TATGCTTTCTACTCCAATCAATCACCACAAAGTGCTATATTAGGCATGCATA<br>ATAT<br>CGTTGAAAGACCAATGGTTGTAATGGT | dihydrolipoamide succinyltransferase<br>component (E2) of 2-oxoglutarate<br>dehydrogenase complex [Francisella sp.<br>TX077308] >ref [WP_013922347.1]<br>dihydrolipoamide succinyltransferase<br>[Francisella sp. TX077308] >gb [AEI35504.1]<br>Dihydrolipoamide succinyltransferase<br>component (E2) of 2-oxoglutarate<br>dehydrogenase complex [Francisella sp.<br>TX077308] | 201  | 201  | 75% | 2,00E-59 | 88% | Francisella cf. novicida Fx1, complete genome  | 191  | 70% | 5,00E-45 | 78% |
| >contig11296 length=197 numreads=8<br>AAGTGTITTTGTTGATCTTTTGAACCTAGTTAAGCTATAAATCTACTAAGTTA<br>TTAT<br>TCITAGATTTTTAGTATTACCTTAcTCAACTTCTTGAATCAACTCTGCAAT<br>AG<br>TACCAGGTTTCTAGCAACGATACAGTTACCTGAATCTCTAGCAACAATCTTCC<br>ATAC<br>CAGTACCAACCATGGC                                                                                                                                                   | DNA-directed RNA polymerase subunit<br>beta [Francisella sp. TX077308]<br>>ref [WP_013922413.1] DNA-directed RNA<br>polymerase subunit beta [Francisella sp.<br>TX077308] >gb [AEI35570.1] DNA-directed<br>RNA polymerase beta subunit [Francisella<br>sp. TX077308]                                                                                                            | 94.7 | 94.7 | 70% | 3,00E-20 | 85% | Francisella cf. novicida Fx1, complete genome  | 147  | 67% | 7,00E-32 | 81% |
| >contig164872 length=145 numreads=6<br>CAACGATACCAATACCATAAACTCTTCAATGACTCTCGTTAGCTAATCTTTCC<br>ACTA<br>ACTCTAGAGATATTTGTAACCTTTCAGTTCTTCAGCATCAATATTCATACCAACA<br>TTAT<br>ATTGTTTTGCTAACTGAGTCAATTT                                                                                                                                                                                                    | proline dehydrogenase [Francisella sp.<br>TX077308] >ref [WP_013923002.1]<br>pyrroline-5-carboxylate dehydrogenase<br>[Francisella sp. TX077308] >gb [AEI36168.1]<br>Proline dehydrogenase (Proline oxidase) /<br>Delta-1-pyrroline-5-carboxylate<br>dehydrogenase [Francisella sp. TX077308]                                                                                   | 87.0 | 87.0 | 62% | 1,00E-17 | 90% | Francisella cf. novicida Fx1, complete genome  | 124  | 58% | 3,00E-25 | 83% |
| >contig168285 length=140 numreads=7<br>TCtCTTACAAGTACCAGTTCCACCCTCATCTGAGTTACAAAACACATACTTTTGA<br>CCAG<br>GCATACTACGGGGCATAAAGCTCCATTCAAACCTGTTGGGAAACCCAGCACCCAC<br>CACGAC<br>CTCTAAGACCAGACTTTTT                                                                                                                                                                                                      | NADH dehydrogenase [Fangia<br>hongkongensis]                                                                                                                                                                                                                                                                                                                                    | 95.9 | 95.9 | 84% | 4,00E-22 | 93% | Francisella cf. novicida Fx1, complete genome  | 126  | 82% | 5,00E-26 | 84% |
| >contig100890 length=212 numreads=12<br>GCTATAGTAACTTTGATAGCCTCGACCATTTGCTAAAGAATAAACCTTATAcCtT<br>GTCT<br>TTCTGTGGTAACTATCCGTAACGATTAAACATATAAAAGCTAGCAGCATGAT<br>GTCC<br>ACCTAAAATTTGCTAGCTGTGTAGCATCTTGCTACATCGTGTATCTCAATAACCA<br>CACG<br>GTTTGCACCTGCTTGAAGCACTGATGCTTCAG                                                                                                                          | Protein-export membrane protein SecD<br>[Francisella sp. TX077308]<br>>ref [WP_013923354.1] preprotein<br>translocase subunit SecD [Francisella sp.<br>TX077308] >gb [AEI36523.1] Protein-export<br>membrane protein SecD [Francisella sp.<br>TX077308]                                                                                                                         | 139  | 139  | 86% | 1,00E-36 | 94% | Francisella cf. novicida Fx1, complete genome  | 228  | 87% | 2,00E-56 | 86% |
| >contig135083 length=171 numreads=6<br>GAAGGTGCACCGTTATTTGATGATGAAAACCAACAGATTACAATGCTTTCAAGC<br>AATCAA<br>GTAGCTCTTAATTTTGGATAACAATGGTAACTGAAAATATCCACAGA<br>ACCTT<br>AATGGTGAATAGATGGTCAACAGCTGTTACAGCCCTAAATGGTCGTGA                                                                                                                                                                                 | Phosphoribosylformylglycinamide<br>synthase, synthetase subunit /<br>Phosphoribosylformylglycinamide<br>synthase, glutamine amidotransferase<br>subunit [Francisella cf. novicida 3523]                                                                                                                                                                                         | 87.4 | 87.4 | 77% | 6,00E-18 | 68% | Francisella cf. novicida Fx1, complete genome  | 82.4 | 29% | 2,00E-12 | 89% |

|                                                                                                                                                                                                                                                                                                                                                                                                                                                                                                                                                                                                                                                                                                                                                                                                                                                                                                                                                                                                                                                                                                                                                                                                                                                                                                                                                                                                                                               |                                                                                                                                                                                                                                                                                                                       |      |      |     |          |      |                                                                         |     |     |          |     |
|-----------------------------------------------------------------------------------------------------------------------------------------------------------------------------------------------------------------------------------------------------------------------------------------------------------------------------------------------------------------------------------------------------------------------------------------------------------------------------------------------------------------------------------------------------------------------------------------------------------------------------------------------------------------------------------------------------------------------------------------------------------------------------------------------------------------------------------------------------------------------------------------------------------------------------------------------------------------------------------------------------------------------------------------------------------------------------------------------------------------------------------------------------------------------------------------------------------------------------------------------------------------------------------------------------------------------------------------------------------------------------------------------------------------------------------------------|-----------------------------------------------------------------------------------------------------------------------------------------------------------------------------------------------------------------------------------------------------------------------------------------------------------------------|------|------|-----|----------|------|-------------------------------------------------------------------------|-----|-----|----------|-----|
| <p>&gt;contig58976 length=318 numreads=11<br/> GGACTAATCGTAGCACCCCAAGACTGGTAAAAAATCATGATGCAAAATATC<br/> GCAACT<br/> TCAATTGCAAAAAACCATCTGAATgtAACCTAATCATGCTTTAATTGATGAAAG<br/> ACCA<br/> GAGGAAGTAACAGAAaTGCAACGCTCTGCGTGGTGAAGTTGTAGCAAGTAC<br/> ATTTGAT<br/> GAACCAGCTGCTCGCATGTACAGCTAGCAGAGATTGAATGAAAAAGCTAAA<br/> AGATTA<br/> GTTGAGCATAAAACAAGATGTAGTAATCTTACTTGACTCAATCAAGACTTGCTC<br/> GTGCA<br/> TACAACACAGTATCTCT<br/> &gt;contig90038 length=230 numreads=11<br/> AGCCTACATTACTGTCTATCAAAACGACCGGCTTAAAAAGTCATTATCTAGC<br/> ACAT<br/> CTGGTCTATTAGTAGCAGCAATTACAATTACACCTTATTATCTGCAAAACCATCC<br/> ATTT<br/> CTACAAGTAGTTGGTTAAGAGTTTGCTCAGCTCATCTATTACCACCCACCTACCT<br/> GAGC<br/> CACGATGACGACCAACTGCATCTATCTCATCAATAATACCAAGCATGGA<br/> ATAC<br/> &gt;contig151752 length=156 numreads=7<br/> CAGTGTCTAAATCAGATGCTGTTATTTTAACTTATTCTGTATGTCAAAAA<br/> ATAC<br/> ATGACAGTAATGGCATAGTACTTTTGCTATTtCTATAGATAACATTGATTGCAA<br/> GGCT<br/> TAAGCAAGTCTCTCTATTAGTACAAAATTCATTT<br/> &gt;contig52685 length=350 numreads=17<br/> AGAGCTCGTAAAGTTAGATTGTGCGGATAATTGGAAAAACACTACTACTC<br/> ATGGAT<br/> GCGTGATTACAAGATTGGTGGTGTCAAGACAGCTTTGGTGGGTCATAGAAT<br/> ACCTGC<br/> TTGGTTTGATAATGATGGTAATGTATTTGGTGGCGAgTCAGAAACAATCCGT<br/> ACAAA<br/> GCATAAICTAGCTGAGAGCATAGAGCTTAATCAAGACAATGATGATTGATACA<br/> TGTT<br/> CTCATCTGATTGGCCATTTAGTACTAGTTGGCTGAGCAAACCTCTGAGC<br/> TAGC<br/> TAAACTACTCTCAACAGCTGCTGTAACAGTTTTGATATTCTCT</p> | <p>transcription termination factor Rho<br/> [Francisella tularensis subsp. holarctica<br/> F92] &gt;ref WP_015083803.1  transcription<br/> termination factor Rho [Francisella<br/> tularensis] &gt;gb AFX70309.1  transcription<br/> termination factor Rho [Francisella<br/> tularensis subsp. holarctica F92]</p> | 218  | 218  | 87% | 1,00E-68 | 100% | Francisella noatunensis subsp. orientalis LADL-07-285A, complete genome | 359 | 85% | 1,00E-95 | 87% |
| <p>&gt;contig90038 length=230 numreads=11<br/> AGCCTACATTACTGTCTATCAAAACGACCGGCTTAAAAAGTCATTATCTAGC<br/> ACAT<br/> CTGGTCTATTAGTAGCAGCAATTACAATTACACCTTATTATCTGCAAAACCATCC<br/> ATTT<br/> CTACAAGTAGTTGGTTAAGAGTTTGCTCAGCTCATCTATTACCACCCACCTACCT<br/> GAGC<br/> CACGATGACGACCAACTGCATCTATCTCATCAATAATACCAAGCATGGA<br/> ATAC<br/> &gt;contig151752 length=156 numreads=7<br/> CAGTGTCTAAATCAGATGCTGTTATTTTAACTTATTCTGTATGTCAAAAA<br/> ATAC<br/> ATGACAGTAATGGCATAGTACTTTTGCTATTtCTATAGATAACATTGATTGCAA<br/> GGCT<br/> TAAGCAAGTCTCTCTATTAGTACAAAATTCATTT<br/> &gt;contig52685 length=350 numreads=17<br/> AGAGCTCGTAAAGTTAGATTGTGCGGATAATTGGAAAAACACTACTACTC<br/> ATGGAT<br/> GCGTGATTACAAGATTGGTGGTGTCAAGACAGCTTTGGTGGGTCATAGAAT<br/> ACCTGC<br/> TTGGTTTGATAATGATGGTAATGTATTTGGTGGCGAgTCAGAAACAATCCGT<br/> ACAAA<br/> GCATAAICTAGCTGAGAGCATAGAGCTTAATCAAGACAATGATGATTGATACA<br/> TGTT<br/> CTCATCTGATTGGCCATTTAGTACTAGTTGGCTGAGCAAACCTCTGAGC<br/> TAGC<br/> TAAACTACTCTCAACAGCTGCTGTAACAGTTTTGATATTCTCT</p>                                                                                                                                                                                                                                                                                                                                                                                                                                 | <p>ATP-dependent metalloprotease<br/> [Francisella philomiragia] &gt;gb EET21773.1 <br/> ATP-dependent metalloprotease<br/> [Francisella philomiragia subsp.<br/> philomiragia ATCC 25015]</p>                                                                                                                        | 125  | 125  | 75% | 3,00E-31 | 97%  | Francisella noatunensis subsp. orientalis LADL-07-285A, complete genome | 254 | 72% | 5,00E-64 | 88% |
| <p>&gt;contig132923 length=173<br/> numreads=6GTGCAAATGAAGCTGTTCTAAAATGCTTGCTGAAATAGAGAGTG<br/> TTGAAAATATTGATA<br/> AATTTATAGCAaaAGCAAAAGATAAGAATGATCCATTTAGACTAATGGGCTTTG<br/> GTCATA<br/> GAGTTTACAAAAACACTGACCCAAGAGCTACAGCTATGAAAGAAAATTGCGAA<br/> &gt;contig78870 length=254 numreads=10<br/> ATCGTTGCTAAAATAATATCAGGATTTGAGTATGAGTAAGATAATAGATGTAG<br/> AAACAA<br/> GCATAAATAAACACCTTTAAAAGAACCTTTACAACAGCGGTAAGAAGTACTA<br/> ACCATA<br/> TAGACTCTAGCTTAAAGATAACTACTGATGATGgTTTAGTTGGTTTTGGAGTT<br/> GCTC<br/> caGCTACTACGGCGATTACTGGTGATACCCTtGAGGGATGAAGTATATTGCTGA<br/> AGAAC<br/> TTTTACACCTGTT<br/> &gt;contig66992 length=288 numreads=12<br/> CTCTTAGAGCTAAAAGTTTAGGATGTCTGTATAGAGCATTTGAATCAAGATTGAT<br/> TTTAC<br/> CATCAACACATACGATCTCACCATTTCTCTACAGCAAGGGTTAATCTCAaAT<br/> AGTG<br/> CAAAGTCACATTCACAAAATGCTTTGTAaGCACCTATCATAGCTTTGTGAAGTC<br/> GTTGA<br/> TTgTtGCTTCTAAGCCTAGTTGAAAAGCAACATCACGAGCTTGAATGGTTG<br/> AAGGC<br/> CTACTAATGGATCTACTCTACTTTAAGAAATTTTTCTGGAGTTAT</p>                                                                                                                                                                                                                                                                                                                                                                                                                                          | <p>DNA polymerase III subunit beta<br/> [Francisella tularensis] &gt;gb EET20098.1 <br/> DNA polymerase III [Francisella tularensis<br/> subsp. tularensis MA00-2987]</p>                                                                                                                                             | 94.4 | 94.4 | 82% | 9,00E-22 | 92%  | Francisella noatunensis subsp. orientalis LADL-07-285A, complete genome | 132 | 78% | 1,00E-27 | 83% |
| <p>&gt;contig132923 length=173<br/> numreads=6GTGCAAATGAAGCTGTTCTAAAATGCTTGCTGAAATAGAGAGTG<br/> TTGAAAATATTGATA<br/> AATTTATAGCAaaAGCAAAAGATAAGAATGATCCATTTAGACTAATGGGCTTTG<br/> GTCATA<br/> GAGTTTACAAAAACACTGACCCAAGAGCTACAGCTATGAAAGAAAATTGCGAA<br/> &gt;contig78870 length=254 numreads=10<br/> ATCGTTGCTAAAATAATATCAGGATTTGAGTATGAGTAAGATAATAGATGTAG<br/> AAACAA<br/> GCATAAATAAACACCTTTAAAAGAACCTTTACAACAGCGGTAAGAAGTACTA<br/> ACCATA<br/> TAGACTCTAGCTTAAAGATAACTACTGATGATGgTTTAGTTGGTTTTGGAGTT<br/> GCTC<br/> caGCTACTACGGCGATTACTGGTGATACCCTtGAGGGATGAAGTATATTGCTGA<br/> AGAAC<br/> TTTTACACCTGTT<br/> &gt;contig66992 length=288 numreads=12<br/> CTCTTAGAGCTAAAAGTTTAGGATGTCTGTATAGAGCATTTGAATCAAGATTGAT<br/> TTTAC<br/> CATCAACACATACGATCTCACCATTTCTCTACAGCAAGGGTTAATCTCAaAT<br/> AGTG<br/> CAAAGTCACATTCACAAAATGCTTTGTAaGCACCTATCATAGCTTTGTGAAGTC<br/> GTTGA<br/> TTgTtGCTTCTAAGCCTAGTTGAAAAGCAACATCACGAGCTTGAATGGTTG<br/> AAGGC<br/> CTACTAATGGATCTACTCTACTTTAAGAAATTTTTCTGGAGTTAT</p>                                                                                                                                                                                                                                                                                                                                                                                                                                          | <p>valyl-tRNA synthetase [Francisella<br/> tularensis subsp. tularensis WY96-3418]</p>                                                                                                                                                                                                                                | 215  | 215  | 89% | 1,00E-62 | 81%  | Francisella noatunensis subsp. orientalis LADL-07-285A, complete genome | 241 | 84% | 5,00E-60 | 80% |
| <p>&gt;contig132923 length=173<br/> numreads=6GTGCAAATGAAGCTGTTCTAAAATGCTTGCTGAAATAGAGAGTG<br/> TTGAAAATATTGATA<br/> AATTTATAGCAaaAGCAAAAGATAAGAATGATCCATTTAGACTAATGGGCTTTG<br/> GTCATA<br/> GAGTTTACAAAAACACTGACCCAAGAGCTACAGCTATGAAAGAAAATTGCGAA<br/> &gt;contig78870 length=254 numreads=10<br/> ATCGTTGCTAAAATAATATCAGGATTTGAGTATGAGTAAGATAATAGATGTAG<br/> AAACAA<br/> GCATAAATAAACACCTTTAAAAGAACCTTTACAACAGCGGTAAGAAGTACTA<br/> ACCATA<br/> TAGACTCTAGCTTAAAGATAACTACTGATGATGgTTTAGTTGGTTTTGGAGTT<br/> GCTC<br/> caGCTACTACGGCGATTACTGGTGATACCCTtGAGGGATGAAGTATATTGCTGA<br/> AGAAC<br/> TTTTACACCTGTT<br/> &gt;contig66992 length=288 numreads=12<br/> CTCTTAGAGCTAAAAGTTTAGGATGTCTGTATAGAGCATTTGAATCAAGATTGAT<br/> TTTAC<br/> CATCAACACATACGATCTCACCATTTCTCTACAGCAAGGGTTAATCTCAaAT<br/> AGTG<br/> CAAAGTCACATTCACAAAATGCTTTGTAaGCACCTATCATAGCTTTGTGAAGTC<br/> GTTGA<br/> TTgTtGCTTCTAAGCCTAGTTGAAAAGCAACATCACGAGCTTGAATGGTTG<br/> AAGGC<br/> CTACTAATGGATCTACTCTACTTTAAGAAATTTTTCTGGAGTTAT</p>                                                                                                                                                                                                                                                                                                                                                                                                                                          | <p>GlhA [Francisella sp. TX119]</p>                                                                                                                                                                                                                                                                                   | 112  | 112  | 87% | 3,00E-29 | 88%  | Francisella noatunensis subsp. orientalis LADL-07-285A, complete genome | 176 | 87% | 6,00E-41 | 85% |
| <p>&gt;contig132923 length=173<br/> numreads=6GTGCAAATGAAGCTGTTCTAAAATGCTTGCTGAAATAGAGAGTG<br/> TTGAAAATATTGATA<br/> AATTTATAGCAaaAGCAAAAGATAAGAATGATCCATTTAGACTAATGGGCTTTG<br/> GTCATA<br/> GAGTTTACAAAAACACTGACCCAAGAGCTACAGCTATGAAAGAAAATTGCGAA<br/> &gt;contig78870 length=254 numreads=10<br/> ATCGTTGCTAAAATAATATCAGGATTTGAGTATGAGTAAGATAATAGATGTAG<br/> AAACAA<br/> GCATAAATAAACACCTTTAAAAGAACCTTTACAACAGCGGTAAGAAGTACTA<br/> ACCATA<br/> TAGACTCTAGCTTAAAGATAACTACTGATGATGgTTTAGTTGGTTTTGGAGTT<br/> GCTC<br/> caGCTACTACGGCGATTACTGGTGATACCCTtGAGGGATGAAGTATATTGCTGA<br/> AGAAC<br/> TTTTACACCTGTT<br/> &gt;contig66992 length=288 numreads=12<br/> CTCTTAGAGCTAAAAGTTTAGGATGTCTGTATAGAGCATTTGAATCAAGATTGAT<br/> TTTAC<br/> CATCAACACATACGATCTCACCATTTCTCTACAGCAAGGGTTAATCTCAaAT<br/> AGTG<br/> CAAAGTCACATTCACAAAATGCTTTGTAaGCACCTATCATAGCTTTGTGAAGTC<br/> GTTGA<br/> TTgTtGCTTCTAAGCCTAGTTGAAAAGCAACATCACGAGCTTGAATGGTTG<br/> AAGGC<br/> CTACTAATGGATCTACTCTACTTTAAGAAATTTTTCTGGAGTTAT</p>                                                                                                                                                                                                                                                                                                                                                                                                                                          | <p>Muconate cycloisomerase [Francisella cf.<br/> novicida 3523] &gt;ref WP_014547998.1 <br/> mandelate racemase [Francisella novicida]<br/> &gt;gb AEB28546.1  Muconate<br/> cycloisomerase [Francisella cf. novicida<br/> 3523]</p>                                                                                  | 119  | 119  | 79% | 3,00E-30 | 76%  | Francisella noatunensis subsp. orientalis LADL-07-285A, complete genome | 134 | 82% | 6,00E-28 | 77% |
| <p>&gt;contig132923 length=173<br/> numreads=6GTGCAAATGAAGCTGTTCTAAAATGCTTGCTGAAATAGAGAGTG<br/> TTGAAAATATTGATA<br/> AATTTATAGCAaaAGCAAAAGATAAGAATGATCCATTTAGACTAATGGGCTTTG<br/> GTCATA<br/> GAGTTTACAAAAACACTGACCCAAGAGCTACAGCTATGAAAGAAAATTGCGAA<br/> &gt;contig78870 length=254 numreads=10<br/> ATCGTTGCTAAAATAATATCAGGATTTGAGTATGAGTAAGATAATAGATGTAG<br/> AAACAA<br/> GCATAAATAAACACCTTTAAAAGAACCTTTACAACAGCGGTAAGAAGTACTA<br/> ACCATA<br/> TAGACTCTAGCTTAAAGATAACTACTGATGATGgTTTAGTTGGTTTTGGAGTT<br/> GCTC<br/> caGCTACTACGGCGATTACTGGTGATACCCTtGAGGGATGAAGTATATTGCTGA<br/> AGAAC<br/> TTTTACACCTGTT<br/> &gt;contig66992 length=288 numreads=12<br/> CTCTTAGAGCTAAAAGTTTAGGATGTCTGTATAGAGCATTTGAATCAAGATTGAT<br/> TTTAC<br/> CATCAACACATACGATCTCACCATTTCTCTACAGCAAGGGTTAATCTCAaAT<br/> AGTG<br/> CAAAGTCACATTCACAAAATGCTTTGTAaGCACCTATCATAGCTTTGTGAAGTC<br/> GTTGA<br/> TTgTtGCTTCTAAGCCTAGTTGAAAAGCAACATCACGAGCTTGAATGGTTG<br/> AAGGC<br/> CTACTAATGGATCTACTCTACTTTAAGAAATTTTTCTGGAGTTAT</p>                                                                                                                                                                                                                                                                                                                                                                                                                                          | <p>succinyl-CoA synthetase subunit beta<br/> [Francisella philomiragia subsp.<br/> philomiragia ATCC 25017]</p>                                                                                                                                                                                                       | 193  | 193  | 84% | 1,00E-57 | 96%  | Francisella noatunensis subsp. orientalis LADL-07-285A, complete genome | 307 | 84% | 4,00E-80 | 86% |

|                                                                                                                                                                                                                                                                                                                                                                                                                                                                                                                                                                                                                                                                                                                                                                          |                                                                                                                                                                                                                                                                                             |                  |              |                    |                |                 |                                                                         |              |                    |                |                 |
|--------------------------------------------------------------------------------------------------------------------------------------------------------------------------------------------------------------------------------------------------------------------------------------------------------------------------------------------------------------------------------------------------------------------------------------------------------------------------------------------------------------------------------------------------------------------------------------------------------------------------------------------------------------------------------------------------------------------------------------------------------------------------|---------------------------------------------------------------------------------------------------------------------------------------------------------------------------------------------------------------------------------------------------------------------------------------------|------------------|--------------|--------------------|----------------|-----------------|-------------------------------------------------------------------------|--------------|--------------------|----------------|-----------------|
| >contig77912 length=256 numreads=10<br>ATGATGCATGCTCAAGTGGTGGCAGCTGCAAAACCTTTAGAAGCTCATCATA<br>ATGCC<br>TTAGATATGCCGTTGACTTGGTGTATAGCTCCAGAGCTTTATCTAAAAAGATTAG<br>TTGTT<br>GGTGGTTTTGAGCGTGTTCAGAAATAAACCCGTAATTCCTGAATGAAGGTGAT<br>CTCA<br>AGACATAATCTGAAATTTACTATGTCTAGAGTTTTACATGGCGTATGCTGATTATA<br>ATGAT<br>CTTATGGATCTAACAG<br>>contig153082 length=155 numreads=8<br>AAAAAGAGCAAGgTATAGATCTTCATAATGATAAGCTAGCTCTACAAAGAGTAA<br>GAGAAG<br>CAGCTGAAAAAGCTAAAGTAGAATGCTCTCTGCTCAGCAAAACAGATGTAACCT<br>TACCTT<br>ATGTAACAGCTGATGCTACAGGACCTAACATTTA<br>>contig155456 length=153 numreads=8<br>GCTAGATCTCATGCTAACTATGCTTTTACTTAGGTGCTACAAATGACAATGCTGG<br>AAGAG<br>CTAAAACCGCTGAAACCAATGATGCTTGCTATTAAAGATTTCAATGGGTGCTT<br>CAACT<br>GGTAATATGCTAGTCAATAACAAAGAACTCTT | lysyl-tRNA synthetase [Francisella cf. novicida 3523] >ref WP_014547489.1  lysyl-tRNA synthetase [Francisella novicida] >gb AE828010.1  Lysyl-tRNA synthetase (class II) [Francisella cf. novicida 3523]                                                                                    | 182              | 182          | 90%                | 2,00E-52       | 99%             | Francisella noatunensis subsp. orientalis LADL-07-285A, complete genome | 302          | 90%                | 2,00E-78       | 88%             |
| >contig153082 length=155 numreads=8<br>AAAAAGAGCAAGgTATAGATCTTCATAATGATAAGCTAGCTCTACAAAGAGTAA<br>GAGAAG<br>CAGCTGAAAAAGCTAAAGTAGAATGCTCTCTGCTCAGCAAAACAGATGTAACCT<br>TACCTT<br>ATGTAACAGCTGATGCTACAGGACCTAACATTTA<br>>contig155456 length=153 numreads=8<br>GCTAGATCTCATGCTAACTATGCTTTTACTTAGGTGCTACAAATGACAATGCTGG<br>AAGAG<br>CTAAAACCGCTGAAACCAATGATGCTTGCTATTAAAGATTTCAATGGGTGCTT<br>CAACT<br>GGTAATATGCTAGTCAATAACAAAGAACTCTT                                                                                                                                                                                                                                                                                                                                       | chaperone protein DnaK [Francisella guangzhouensis]                                                                                                                                                                                                                                         | 106              | 106          | 79%                | 5,00E-25       | 96%             | Francisella noatunensis subsp. orientalis LADL-07-285A, complete genome | 209          | 79%                | 6,00E-51       | 91%             |
| >contig155456 length=153 numreads=8<br>GCTAGATCTCATGCTAACTATGCTTTTACTTAGGTGCTACAAATGACAATGCTGG<br>AAGAG<br>CTAAAACCGCTGAAACCAATGATGCTTGCTATTAAAGATTTCAATGGGTGCTT<br>CAACT<br>GGTAATATGCTAGTCAATAACAAAGAACTCTT                                                                                                                                                                                                                                                                                                                                                                                                                                                                                                                                                            | dihydroorotase [Francisella sp. TX077308] >ref WP_013921817.1  dihydroorotase [Francisella sp. TX077308] >gb AEI34954.1  Dihydroorotase [Francisella sp. TX077308]                                                                                                                          | 106              | 106          | 81%                | 9,00E-26       | 98%             | Francisella noatunensis subsp. orientalis LADL-07-285A, complete genome | 182          | 71%                | 1,00E-42       | 91%             |
| <b>Contigs</b>                                                                                                                                                                                                                                                                                                                                                                                                                                                                                                                                                                                                                                                                                                                                                           | <b>Blastx</b>                                                                                                                                                                                                                                                                               | <b>Max score</b> | <b>Score</b> | <b>Query Cover</b> | <b>e-value</b> | <b>Identity</b> | <b>Blastn</b>                                                           | <b>Score</b> | <b>Query Cover</b> | <b>e-value</b> | <b>Identity</b> |
| >contig98282 length=216 numreads=9<br>CCCATAGCGGATAGTTCTAACTACACCATCACCGATTTGTTGGTCACTCTAGTAC<br>AAGA<br>GATGCCCTCTCTACTTTAATGCTTCATATATCTTTGGTATTATCGCGTGA<br>CTCC<br>ACATCGATAACAGGACCAATTACTTGAATAATTTTACCAGTACTATTATCTCTC<br>CTAA<br>ACTGCTGCTGCACCTGAACAAATTCAGCAAGCTCT<br>>contig100997 length=212 numreads=8<br>ACTGATAGTTTACTGGGCTAGTTCTACTTGTAGCTTACCTCATGAGTTTTAGCC<br>CTTA<br>ATGAAAAATTTCAAGAAATAAGCTAGTTCTATCaTGATTTTACACTCAAGAAAT<br>TTTT<br>CAATAATTTCTCTCTTGAGATGGCTTAATGGgTGGTTAAAAACAACACTACATCAGC<br>ATCCA<br>ACTCATCGCGTTGTTTTTATCATTCCATT                                                                                                                                                                                                           | FOF1 ATP synthase subunit beta [Francisella philomiragia subsp. philomiragia ATCC 25017]                                                                                                                                                                                                    | 102              | 102          | 63%                | 5,00E-24       | 91%             | Francisella noatunensis subsp. orientalis LADL-07-285A, complete genome | 261          | 82%                | 2,00E-66       | 88%             |
| >contig100997 length=212 numreads=8<br>ACTGATAGTTTACTGGGCTAGTTCTACTTGTAGCTTACCTCATGAGTTTTAGCC<br>CTTA<br>ATGAAAAATTTCAAGAAATAAGCTAGTTCTATCaTGATTTTACACTCAAGAAAT<br>TTTT<br>CAATAATTTCTCTCTTGAGATGGCTTAATGGgTGGTTAAAAACAACACTACATCAGC<br>ATCCA<br>ACTCATCGCGTTGTTTTTATCATTCCATT                                                                                                                                                                                                                                                                                                                                                                                                                                                                                           | GTP-binding protein HflX [Francisella sp. TX077308] >ref WP_013923337.1  protease [Francisella sp. TX077308] >gb AEI36505.1  GTP-binding protein HflX [Francisella sp. TX077308]                                                                                                            | 142              | 142          | 82%                | 2,00E-38       | 97%             | Francisella noatunensis subsp. orientalis LADL-07-285A, complete genome | 231          | 83%                | 2,00E-57       | 86%             |
| >contig155433 length=153 numreads=6<br>TTGAGCTTGAGACTAGCCATTTGTTTACAACAAATCTCATGTTTCAACGG<br>TTAT<br>AAAACCTATTGATAACATTACACGAATCTGCTTATCATTTGACTTTAAAAGTGT<br>GAAA<br>ATGCAGTTTGTGGTCTGCTCATATTATCAGCAT<br>>contig65820 length=291 numreads=14<br>CGATTTACTCTCTGATAACTCGGTATCATGGTTTATACTTTGCGTGAATGAG<br>AAAT<br>ACTATCGATAATCTTGTAGTACAAAAAGATATTATCGAAGATAGAGTAAAGGGT<br>ACAAGT<br>GCATACCTATCAAGCTTCTACCTACACTCTTGATGCAAAACACTgAGTTTATGCG<br>TGAA<br>GATTGCTACAAAATCgTACAGCAAGTAGCATTTGAGCTTAAAGCTGGCGAATCAT<br>TCTCA<br>CAAAAGCTACAAGCTATTATGAAGTctGAGCATGATGATCGACTAAGCGTT                                                                                                                                                                                        | aminopeptidase N [Francisella philomiragia subsp. philomiragia ATCC 25017] >ref WP_012280259.1  aminopeptidase [Francisella philomiragia] >gb AB287056.1  aminopeptidase N [Francisella philomiragia subsp. philomiragia ATCC 25017]                                                        | 102              | 102          | 80%                | 1,00E-23       | 94%             | Francisella noatunensis subsp. orientalis LADL-07-285A, complete genome | 204          | 81%                | 3,00E-49       | 91%             |
| >contig155433 length=153 numreads=6<br>TTGAGCTTGAGACTAGCCATTTGTTTACAACAAATCTCATGTTTCAACGG<br>TTAT<br>AAAACCTATTGATAACATTACACGAATCTGCTTATCATTTGACTTTAAAAGTGT<br>GAAA<br>ATGCAGTTTGTGGTCTGCTCATATTATCAGCAT<br>>contig65820 length=291 numreads=14<br>CGATTTACTCTCTGATAACTCGGTATCATGGTTTATACTTTGCGTGAATGAG<br>AAAT<br>ACTATCGATAATCTTGTAGTACAAAAAGATATTATCGAAGATAGAGTAAAGGGT<br>ACAAGT<br>GCATACCTATCAAGCTTCTACCTACACTCTTGATGCAAAACACTgAGTTTATGCG<br>TGAA<br>GATTGCTACAAAATCgTACAGCAAGTAGCATTTGAGCTTAAAGCTGGCGAATCAT<br>TCTCA<br>CAAAAGCTACAAGCTATTATGAAGTctGAGCATGATGATCGACTAAGCGTT                                                                                                                                                                                        | adenylosuccinate lyase [Francisella novicida] >gb EDN36974.1  adenylosuccinate lyase [Francisella novicida GA99-3549]                                                                                                                                                                       | 174              | 174          | 92%                | 4,00E-50       | 81%             | Francisella noatunensis subsp. orientalis LADL-07-285A, complete genome | 198          | 72%                | 2,00E-47       | 82%             |
| >contig119776 length=186 numreads=6<br>CAATCCCTGTGCTTCAATATCATCTTAAAAGTACAAAGCTTTCTTTATATTCT<br>CAA<br>GAATACAGTAGCATATTACACGCAATATCTCCAGTCAAAAACACATTTGG<br>GAATC<br>TATTTTTAGCTTGAACATAAATCTCTATAAACTCATCaGTTTACCTGAGAGA<br>CTC<br>TTGGTA                                                                                                                                                                                                                                                                                                                                                                                                                                                                                                                              | malate dehydrogenase [Francisella philomiragia subsp. philomiragia ATCC 25017] >ref WP_012279885.1  malate dehydrogenase [Francisella philomiragia] >gb AB286612.1  Malate dehydrogenase (oxaloacetate-decarboxylating) (NADP(+)) [Francisella philomiragia subsp. philomiragia ATCC 25017] | 126              | 126          | 88%                | 2,00E-32       | 89%             | Francisella noatunensis subsp. orientalis LADL-07-285A, complete genome | 196          | 88%                | 5,00E-47       | 86%             |

|                                                                                                                                                                                                                                                                                                                                                                                                                                                                                                                                                                                                                                                                                                                                                                                                                                                                                                                                                                                                                                                                                                                                                                                                                       |                                                                                                                                                                                                                                                                               |      |      |     |          |      |                                                                         |     |      |          |     |
|-----------------------------------------------------------------------------------------------------------------------------------------------------------------------------------------------------------------------------------------------------------------------------------------------------------------------------------------------------------------------------------------------------------------------------------------------------------------------------------------------------------------------------------------------------------------------------------------------------------------------------------------------------------------------------------------------------------------------------------------------------------------------------------------------------------------------------------------------------------------------------------------------------------------------------------------------------------------------------------------------------------------------------------------------------------------------------------------------------------------------------------------------------------------------------------------------------------------------|-------------------------------------------------------------------------------------------------------------------------------------------------------------------------------------------------------------------------------------------------------------------------------|------|------|-----|----------|------|-------------------------------------------------------------------------|-----|------|----------|-----|
| >contig104939 length=206 numreads=10<br>AaGCGATTGAAGTATAAAATCATTCCAGGGTTAGTTGCTGGAATTGTTGAACGA<br>GGAATA<br>TTTATTTTCATCAAATCATTATAAGTTGTGACCAAAAAACACTACCAATAGCATC<br>ATTA<br>AAAGAGTGTATATCATTTGgAACTTTCTTTAAAGTATTTTTTAACTCAATTTCA<br>CAT<br>TGATCACAATAACACATACACTTGT<br>>contig109684 length=199 numreads=8<br>TGTTGCTTAATLAgGTTATTTCTAAAAGATATGCTCATAATCACTTGGTGAAT<br>AGTT<br>ATCTCTATTTCTCAACTGTGATGCCATTAGTAAAGTTTTATTATCTTTCGCACCT<br>TTT<br>GAGAAATAGCTATTTACCCGGTTTTGAGATTTTTGCTTACCAACATAGATTAT<br>CTCA<br>CCATTAGCATCAATCATT                                                                                                                                                                                                                                                                                                                                                                                                                                                                                                                                                                                                                                                                            | beta-galactosidase [Francisella cf. novicida 3523] >ref WP_014547803.1  beta-galactosidase [Francisella novicida] >gb AEI28345.1  Beta-galactosidase [Francisella cf. novicida 3523]                                                                                          | 133  | 133  | 90% | 1,00E-34 | 86%  | Francisella noatunensis subsp. orientalis LADL-07-285A, complete genome | 183 | 88%  | 5,00E-43 | 83% |
| >contig182245 length=129 numreads=6<br>CTCTTTGAAAAGTCCAGCAACCATAGTTTCCATCGTAGACATAATGATTCTTCAT<br>CAAT<br>AAATGAAGCCTCGATCTATTTGTGTAATCTGGCTGTCTATGCTCTCTAAAT<br>CTTC<br>ATCACGGAA                                                                                                                                                                                                                                                                                                                                                                                                                                                                                                                                                                                                                                                                                                                                                                                                                                                                                                                                                                                                                                    | Aspartyl-tRNA(Asn) synthetase [Francisella sp. TX077308] >ref WP_013921913.1  aspartyl-tRNA synthetase [Francisella sp. TX077308] >gb AEI35052.1  Aspartyl-tRNA synthetase / Aspartyl-tRNA(Asn) synthetase unambiguous [Francisella sp. TX077308]                             | 82.8 | 82.8 | 81% | 5,00E-17 | 91%  | Francisella noatunensis subsp. orientalis LADL-07-285A, complete genome | 159 | 75%  | 5,00E-36 | 91% |
| >contig154187 length=154 numreads=8<br>CTGTAAACTATAGCTGGAGCGTGGGACGTTTGTACTACTGCTCAAGAgTA<br>agAA<br>GCCATTGTGATGCTCTAGTACAGATATAAGGCCTTCAACTAATGGTAAG<br>CCAGC<br>AGGTGCTTTAAAGTAACTACCTTCTTTCTTCC<br>>contig148550 length=159 numreads=6<br>AAATCCAAATGCCAAACTACTTGGTGTGGCTCATCTTTTCTGTATAATAAT<br>CTTA<br>CATATTTTTTCAAAGAACATTTAATGAGAGTACTATGAAAAATTGCAAAATTT<br>GAAG<br>TAGGTAaTGGTAAACCATTTTTTTAATGtCTGGACCAT<br>>contig85088 length=240 numreads=8<br>AAATTTGATGAGTtHCTTTCGCAAAAAGGGTATAGCTATTAATAATCAATCTC<br>TCAA<br>GATTTATCAGTGATGAGACAGtCACTATACCAGGGCTTTGAATGCTTTTAAAGC<br>AAAT<br>GTAACCTGCCAAACCAAGGAGGTTAGATGTTTGAAGGAGGCTGTTTTAAA<br>CTTGAG<br>AATGGTACTAGAAAACAGTTTATAGAAATGCAAGGCTAGCATTTGGTGAGCTA<br>AATAGC<br>>contig90173 length=230 numreads=9<br>TTCACATAATTTTTATTTAATCATGTACACAGACTGTAGCTTCTCTCAACTTGC<br>TCA<br>TCTATAAACCATTTGAAAAAGCTTTAGTTGCATGCTCTTCTCATCTAAAGCAAT<br>ATCC<br>ATTAGGTGATAAAGTTTTgATGTTATATCTTCTCAgTCTTAATGTTCTCGAAA<br>ACT<br>TCAAGTAGCGAGTTAAATGATTTTGAAGGAGCAGCAGTTGCTTGAACCTC<br>>contig185798 length=125 numreads=6<br>TAGCTTTCAAATAAGCTCAATTGCAAGCTTCAATTTGATGGAAGGCTGGGGCATA<br>ACCA<br>CCTCATCAACCAACAGCAACACTATAACCATCTGTTAACTAACACTTTTTTAAGT<br>GTAT<br>GGAAT | dihydroorotase [Francisella sp. TX077308] >ref WP_013921817.1  dihydroorotase [Francisella sp. TX077308] >gb AEI34954.1  Dihydroorotase [Francisella sp. TX077308]                                                                                                            | 103  | 103  | 89% | 7,00E-25 | 98%  | Francisella noatunensis subsp. orientalis LADL-07-285A, complete genome | 156 | 87%  | 7,00E-35 | 85% |
| >contig149725 length=158 numreads=7<br>TAGCTAATGATAAAGGTGACTTGGGCGTAATGCTACTAGCAACAGCTG<br>ATTTGA<br>TGAAATATCAGGTTTAAATAGTCTGTTTATGTGAGCTGATGAATAAAAA<br>TGTTA<br>CTATGATGAATGGTACGAACTTGAACGATTTGCTAA                                                                                                                                                                                                                                                                                                                                                                                                                                                                                                                                                                                                                                                                                                                                                                                                                                                                                                                                                                                                               | 2-dehydro-3-deoxyphosphoconate aldolase [Francisella tularensis subsp. tularensis SCHU 54]                                                                                                                                                                                    | 45.4 | 45.4 | 28% | 6,00E-04 | 100% | Francisella noatunensis subsp. orientalis LADL-07-285A, complete genome | 150 | 100% | 3,00E-33 | 85% |
|                                                                                                                                                                                                                                                                                                                                                                                                                                                                                                                                                                                                                                                                                                                                                                                                                                                                                                                                                                                                                                                                                                                                                                                                                       | phenylalanyl-tRNA synthetase subunit beta [Francisella cf. novicida 3523] >ref WP_014548208.1  phenylalanyl-tRNA synthetase subunit beta [Francisella novicida] >gb AEE26207.1  Phenylalanyl-tRNA synthetase beta chain [Francisella cf. novicida 3523]                       | 124  | 124  | 72% | 7,00E-31 | 82%  | Francisella noatunensis subsp. orientalis LADL-07-285A, complete genome | 150 | 64%  | 6,00E-33 | 82% |
|                                                                                                                                                                                                                                                                                                                                                                                                                                                                                                                                                                                                                                                                                                                                                                                                                                                                                                                                                                                                                                                                                                                                                                                                                       | ferritin [Francisella sp. TX077308] >ref WP_013923318.1  ferritin [Francisella sp. TX077308] >gb AEI36486.1  Ferritin [Francisella sp. TX077308]                                                                                                                              | 129  | 129  | 95% | 7,00E-36 | 78%  | Francisella noatunensis subsp. orientalis LADL-07-285A, complete genome | 147 | 89%  | 6,00E-32 | 79% |
|                                                                                                                                                                                                                                                                                                                                                                                                                                                                                                                                                                                                                                                                                                                                                                                                                                                                                                                                                                                                                                                                                                                                                                                                                       | phosphopyruvate hydratase [Francisella novicida U112] >ref WP_003035924.1  enolase [Francisella novicida]                                                                                                                                                                     | 68.2 | 68.2 | 90% | 4,00E-12 | 95%  | Francisella noatunensis subsp. orientalis LADL-07-285A, complete genome | 137 | 89%  | 2,00E-29 | 87% |
|                                                                                                                                                                                                                                                                                                                                                                                                                                                                                                                                                                                                                                                                                                                                                                                                                                                                                                                                                                                                                                                                                                                                                                                                                       | GTP cyclohydrolase II [Francisella philomiragia subsp. philomiragia ATCC 25017] >ref WP_012280147.1  3,4-dihydroxy-2-butanone 4-phosphate synthase [Francisella philomiragia] >gb ABZ86936.1  GTP cyclohydrolase II [Francisella philomiragia subsp. philomiragia ATCC 25017] | 99.4 | 99.4 | 83% | 2,00E-23 | 89%  | Francisella noatunensis subsp. orientalis LADL-07-285A, complete genome | 137 | 68%  | 3,00E-29 | 86% |



|                                                                                                                                                                                                                                                                                                                                                                                                                                                                                                                                                                                                                                                                                                                                                                                                                                                                                                                                                                                                                                                                                                                                                                                                                                                                                                                                                                                                                                                                                                                                                                                                                                    |                                                                                                                       |      |     |          |          |                                                                                                  |                                                                         |     |          |          |     |
|------------------------------------------------------------------------------------------------------------------------------------------------------------------------------------------------------------------------------------------------------------------------------------------------------------------------------------------------------------------------------------------------------------------------------------------------------------------------------------------------------------------------------------------------------------------------------------------------------------------------------------------------------------------------------------------------------------------------------------------------------------------------------------------------------------------------------------------------------------------------------------------------------------------------------------------------------------------------------------------------------------------------------------------------------------------------------------------------------------------------------------------------------------------------------------------------------------------------------------------------------------------------------------------------------------------------------------------------------------------------------------------------------------------------------------------------------------------------------------------------------------------------------------------------------------------------------------------------------------------------------------|-----------------------------------------------------------------------------------------------------------------------|------|-----|----------|----------|--------------------------------------------------------------------------------------------------|-------------------------------------------------------------------------|-----|----------|----------|-----|
| <p>&gt;contig72436 length=271 numreads=8<br/>CACACTTACATATTTCAACTACAAAGTTtCAACTAACTGTTGCCATGTTCTGTAT<br/>GAG<br/>TAGTTTCAGGATGGAAGCTGCACACCATAAAAAGTTTATGTTTTATGAGATACAG<br/>CTGCAA<br/>TTGGAGACTTTATAGATGAAGCAATATCTCAAAATGTTCCCGGTATCTGTAAC<br/>TTTAT<br/>CGCTATGGCTCATCAAACAAGTTGTTTCAGAACCTAGCTTTGCAAAATACTTATT<br/>TCAT<br/>CTGTGCTATATTTATAGCTTTACCAA<br/>&gt;contig117242 length=190 numreads=12<br/>TTTCTTAAAATCATAAGTTTTCTCATCATCACAGAAGACCAACGAGCTTGAA<br/>CCAC<br/>ATTACACCTTCGTACGAGCATTTTACATTGTACTACTAGCTAAGCGTTGTGCTA<br/>CTAC<br/>ATCAAACCTGAAGTACACCTACCGACCAAGCAGATCATTGAAATCATTGGT<br/>TTAAA<br/>CACTTGCCTA<br/>&gt;contig81714 length=247 numreads=11<br/>TCCCATTTCAAACACATTAGCTCTACCTCTTCTCTTAGGATCATTTCATAACTC<br/>TTA<br/>AGAGCATTTGAAATACTTCAAACCTAATACCTAATTTAAATGATAAAGCTATAG<br/>CAACT<br/>AATGCATTTTCAATATATGCTAGCAAACCTTTAACAGTAGAGTGATGCATCAA<br/>CCAAT<br/>TTTAAAAGAGATTTTTTAAACACCCTTTCAATCCATATAAACTCTCCATCTCAACA<br/>ACA<br/>CTCGCAT<br/>&gt;contig83316 length=244 numreads=11<br/>TAGAGCTATCTCTCAAAAACTTAGCTGGAAGATAAATCATATCATATAAGT<br/>TATTG<br/>CTTTTGATTTCTCACACTCTTTTAAAAGCTTCAAAACCTTATCCAGTAATTTTT<br/>TAT<br/>CTTACTATTTATAGCAAGATTTTTTATTTGAAAGCTTAGGTGAGATTTAAA<br/>AGAG<br/>AGATATATCTTTAAAAGTTCAACTCTTTCAGTATCAATATCTTTGATTATCTTCA<br/>GCT<br/>CTTT<br/>&gt;contig84437 length=241<br/>numreads=8CCATTAATGAAGTACTTATAAAGGAACCAACGGAATAATGATT<br/>TCGCTATATTAAT<br/>GACACCTTCGTGATGCTGTAAGAGAAATAATGCTCCAGGAAATGGTTTATT<br/>AATGGT<br/>TCAACTCATAATAGTAATTAATGGGTAAGTTGTTGAAGTTTATATGGCTCAG<br/>TTAC<br/>ACACTAACCGCTAACGCAATGAATCAGTAACTATGTTGATGCTCATGATAACT<br/>ATACT<br/>C</p> | <p>GMP synthase [Francisella novicida]<br/>&gt;gb EDN36210.1  GMP synthetase<br/>[Francisella novicida GA99-3549]</p> | 125  | 125 | 92%      | 8,00E-32 | 76%                                                                                              | Francisella noatunensis subsp. orientalis LADL-07-285A, complete genome | 134 | 61%      | 6,00E-28 | 80% |
| <p>peptide chain release factor 3 [Francisella philomiragia] &gt;gb EET20777.1  peptide chain release factor [Francisella philomiragia subsp. philomiragia ATCC 25015]</p>                                                                                                                                                                                                                                                                                                                                                                                                                                                                                                                                                                                                                                                                                                                                                                                                                                                                                                                                                                                                                                                                                                                                                                                                                                                                                                                                                                                                                                                         | 130                                                                                                                   | 130  | 87% | 6,00E-34 | 95%      | Francisella noatunensis subsp. orientalis LADL-07-285A, complete genome                          | 130                                                                     | 88% | 6,00E-27 | 79%      |     |
| <p>Mur ligase [Francisella novicida]<br/>&gt;gb EDN37892.1  conserved hypothetical protein [Francisella novicida GA99-3548]</p>                                                                                                                                                                                                                                                                                                                                                                                                                                                                                                                                                                                                                                                                                                                                                                                                                                                                                                                                                                                                                                                                                                                                                                                                                                                                                                                                                                                                                                                                                                    | 129                                                                                                                   | 129  | 93% | 2,00E-33 | 72%      | Francisella noatunensis subsp. orientalis LADL-07-285A, complete genome                          | 126                                                                     | 66% | 9,00E-26 | 80%      |     |
| <p>ATP-dependent DNA helicase UvrD/PcrA/Rep family, Francisella type [Francisella cf. novicida 3523]<br/>&gt;ref WP_014548398.1  DNA helicase [Francisella novicida] &gt;gb AE26402.1  ATP-dependent DNA helicase UvrD/PcrA/Rep family, Francisella type [Francisella cf. novicida 3523]</p>                                                                                                                                                                                                                                                                                                                                                                                                                                                                                                                                                                                                                                                                                                                                                                                                                                                                                                                                                                                                                                                                                                                                                                                                                                                                                                                                       | 100                                                                                                                   | 100  | 84% | 1,00E-22 | 77%      | Francisella noatunensis subsp. orientalis LADL-07-285A, complete genome                          | 108                                                                     | 76% | 4,00E-20 | 76%      |     |
| <p>pullulanase [Francisella philomiragia] &gt;gb EET21947.1  pullulanase [Francisella philomiragia subsp. philomiragia ATCC 25015]</p>                                                                                                                                                                                                                                                                                                                                                                                                                                                                                                                                                                                                                                                                                                                                                                                                                                                                                                                                                                                                                                                                                                                                                                                                                                                                                                                                                                                                                                                                                             | 125                                                                                                                   | 125  | 92% | 3,00E-31 | 69%      | Francisella noatunensis subsp. orientalis LADL-07-285A, complete genome                          | 91.6                                                                    | 87% | 3,00E-15 | 74%      |     |
| <p>glucose-6-phosphate isomerase [Glaciecola psychrophila 170] &gt;ref WP_007636341.1  glucose-6-phosphate isomerase [Glaciecola psychrophila] &gt;dbj GAC36712.1  glucose-6-phosphate isomerase [Glaciecola psychrophila 170] &gt;gb AGH42824.1  glucose-6-phosphate isomerase [Glaciecola psychrophila 170]</p>                                                                                                                                                                                                                                                                                                                                                                                                                                                                                                                                                                                                                                                                                                                                                                                                                                                                                                                                                                                                                                                                                                                                                                                                                                                                                                                  | 127                                                                                                                   | 127  | 80% | 7,00E-33 | 80%      | Francisella noatunensis subsp. orientalis LADL-07-285A, complete genome                          | 60.2                                                                    | 19% | 8,00E-06 | 89%      |     |
| <p>GroEL, partial [Francisella sp. LA112445]</p>                                                                                                                                                                                                                                                                                                                                                                                                                                                                                                                                                                                                                                                                                                                                                                                                                                                                                                                                                                                                                                                                                                                                                                                                                                                                                                                                                                                                                                                                                                                                                                                   | 83.6                                                                                                                  | 83.6 | 62% | 8,00E-18 | 95%      | Francisella philomiragia strain CCUG 19701 GroEL (groEL) gene, partial cds                       | 220                                                                     | 73% | 3,00E-54 | 93%      |     |
| <p>replication initiator [Francisella tularensis subsp. holarctica] &gt;emb CAJ98758.1  replication initiator [Francisella tularensis subsp. holarctica]</p>                                                                                                                                                                                                                                                                                                                                                                                                                                                                                                                                                                                                                                                                                                                                                                                                                                                                                                                                                                                                                                                                                                                                                                                                                                                                                                                                                                                                                                                                       | 119                                                                                                                   | 119  | 74% | 8,00E-32 | 84%      | Francisella philomiragia subsp. noatunensis strain 2005/50/F292-6C DnaA (dnaA) gene, partial cds | 196                                                                     | 61% | 7,00E-47 | 88%      |     |

|                                                                                                                                                                                                                                                                                                                                                                                                                                                                                                                                                                                                                                                                                                                                                                                                                                                                                                                                                                                                                                                                                                                                                                                                                                                                                                                                                                                                                                                                                                                                                                                                                                                                                                                                                                                                                                                                                                                                                                                                                                                                                                                                                                                                                                                                                                                                                                                      |                                                                                                                                                                                                                                                                                                               |      |      |          |          |                                                                             |                                                                                                     |     |           |          |     |
|--------------------------------------------------------------------------------------------------------------------------------------------------------------------------------------------------------------------------------------------------------------------------------------------------------------------------------------------------------------------------------------------------------------------------------------------------------------------------------------------------------------------------------------------------------------------------------------------------------------------------------------------------------------------------------------------------------------------------------------------------------------------------------------------------------------------------------------------------------------------------------------------------------------------------------------------------------------------------------------------------------------------------------------------------------------------------------------------------------------------------------------------------------------------------------------------------------------------------------------------------------------------------------------------------------------------------------------------------------------------------------------------------------------------------------------------------------------------------------------------------------------------------------------------------------------------------------------------------------------------------------------------------------------------------------------------------------------------------------------------------------------------------------------------------------------------------------------------------------------------------------------------------------------------------------------------------------------------------------------------------------------------------------------------------------------------------------------------------------------------------------------------------------------------------------------------------------------------------------------------------------------------------------------------------------------------------------------------------------------------------------------|---------------------------------------------------------------------------------------------------------------------------------------------------------------------------------------------------------------------------------------------------------------------------------------------------------------|------|------|----------|----------|-----------------------------------------------------------------------------|-----------------------------------------------------------------------------------------------------|-----|-----------|----------|-----|
| <p>&gt;contig154340 length=154 numreads=8<br/> CCACATCTCCATCGGAGACATCATCAACAGCTCACTTTAAAACCGACTACTGCTCC<br/> CCAAC<br/> GCATATACATACGCTCAGCAGCTTTACGCCAATCTTGTCTTCTACCTCCAGAA<br/> CCTG<br/> ACTGTATTCTAGAAAACGATTATTGCACTCCAT<br/> &gt;contig27632 length=704 numreads=67<br/> AGATAATATATGGTAGGGGAGCGTCTGTAAAGCCGATGAAGGTGTGTGGAA<br/> GCATGCT<br/> GGAGGTATCAGAAGTGCAGATGCTGACATGAGTAACGTAATAAAGTGAAGT<br/> CTTATTG<br/> GCCGAATACCCAAGGATTCTACGCAATGTTAATCAACGTAGGGTAAGCCGGCA<br/> CCTAAG<br/> GCGTAGCTGAAGAGTGAAGTCGATGGAAAACAGGTTAATATCTGTGCTGCTT<br/> ATATGA<br/> ATGATGGAGGACGGAGAAAGGCTAGGTAGGCCCGGCAATGGTTGCCGGGT<br/> GAAAAGTAA<br/> GTAGGTAGATATGCTAGGTAATCCGGTGTATTGTTGATGCTGAGATACGAGACG<br/> AAGTCA<br/> AACTGTTTACGAAGCTATTGATGCCATGCTCCAGAAAATCTTCAAGTATAT<br/> TGTA<br/> TAGGTAACCGTACTGTAACCGACACTGGTGGTAGGTAGAGAATACTAAGGCT<br/> ATGAGA<br/> CAACTCTGGTGAAGGAAGTACGCAAAATAACCCGTAACCTTGGAAAGAGGTGT<br/> GCCCAT<br/> GTTATGTGAAGGACTGCTCTGGAGCAGAGTGGTTGCAATTATCAGGTGG<br/> CTGCGA<br/> CTGTTTATCAAAAACACGCACTCTGCGAAATCGTAAGATGAAGTATAGGGTGT<br/> GACGCC<br/> TGCCCGGTGCTGGAAGGTTAATTGAAGTGGTTAGCGCAAGCGAA<br/> &gt;contig52227 length=353<br/> numreads=13CTTCATTACAAAAGTTTGCAATTTCCATTTTCAATTTGAAAA<br/> AGgAATAGAAACCA<br/> CTTCCTTCTGTGCAAGAACCGTTTCTCACTTTGTAACATATCCGCTATAGGA<br/> TCTT<br/> GCATACATAACTTAAATCTTATTACCAACTAGCTTTTTCAACAGGAACA<br/> TCAC<br/> CTGCCATTGCATCTCTAAGTTTATTACGGCATAAGCCAACTTTCTGTATACA<br/> GCGT<br/> GTGGTCTACCTGTAACCTTACATCTTCTTGCACACGAGTCTGAAGAGTTTACT<br/> GGTA<br/> GTTTTGACAGCTTGATATTAGCTTCCATCTTCTTCTCAGTAGAATTACA<br/> &gt;contig117077 length=190 numreads=9<br/> GCCAGGATATACATCCATATCTAAGCCATCTATAAGTAATTTCTCAAACTGACT<br/> TAAC<br/> AAGATCTTAACTTTGATGACATTGTTACCAAGTCTTCCACAGTGGGATATAT<br/> AAGTC<br/> TTGAGTTTCATTCGTTTTGGAACTCTTGAGAGCTTAACCTCAAACTTAGCTA<br/> ATCT<br/> TGATTTAGAT<br/> &gt;contig123706 length=183 numreads=6<br/> TAAGATCTTCATCAAACTCAATAAGAGCTCTAGTTACACCAAGCGCAATTGCACC<br/> AGCTT<br/> GACCAAGTAGTACCCACCTTTAACTGTTACTTAAAGTCAAAGTTTTCAGCATT<br/> TCAG<br/> TAAGAACTAGAGGTTGCTTAAACATCATGCAATCAGTTTACGACATAAATACTG<br/> CTCTA<br/> ATG<br/> &gt;contig142976 length=164 numreads=6<br/> AGTGTAACAACAAGCAAGGTTTGAATTTGCTGCGCATAAAaTcATTCTTAag<br/> ACAA<br/> GATCCAGATATAATCATGTTGGTGAAGTACAGGgATATCGAAACTGGATCTATT<br/> GGTATT<br/> AAAGCATCTCAAAACAGGTCACTTAGTTATGTCACGCTACATAC</p> | <p>peptide chain release factor 2 [Francisella<br/> tularensis subsp. tularensis NE061598]<br/> &gt;ref WP_014551162.1  peptide chain<br/> release factor 2 [Francisella tularensis]<br/> &gt;gb ADA77879.1  peptide chain release<br/> factor 2 [Francisella tularensis subsp.<br/> tularensis NE061598]</p> | 87.4 | 87.4 | 62%      | 2,00E-19 | 98%                                                                         | Francisella philomiragia subsp. noatunensis strain<br>2005/50/F292-6C PrfB (prfB) gene, partial cds | 171 | 79%       | 3,00E-39 | 87% |
| <p>30S ribosomal protein S14 [Francisella<br/> philomiragia subsp. philomiragia ATCC<br/> 25017]</p>                                                                                                                                                                                                                                                                                                                                                                                                                                                                                                                                                                                                                                                                                                                                                                                                                                                                                                                                                                                                                                                                                                                                                                                                                                                                                                                                                                                                                                                                                                                                                                                                                                                                                                                                                                                                                                                                                                                                                                                                                                                                                                                                                                                                                                                                                 | 143                                                                                                                                                                                                                                                                                                           | 143  | 52%  | 4,00E-41 | 97%      | Francisella philomiragia subsp. philomiragia ATCC<br>25017, complete genome | 473                                                                                                 | 90% | 4,00E-130 | 91%      |     |
| <p>hypothetical protein [Francisella cf.<br/> novicida Fx1] &gt;ref WP_014550345.1  heme<br/> ABC transporter ATP-binding protein<br/> [Francisella novicida] &gt;gb AEE88185.1  ABC<br/> transporter, ATP-binding family protein<br/> [Francisella cf. novicida Fx1]</p>                                                                                                                                                                                                                                                                                                                                                                                                                                                                                                                                                                                                                                                                                                                                                                                                                                                                                                                                                                                                                                                                                                                                                                                                                                                                                                                                                                                                                                                                                                                                                                                                                                                                                                                                                                                                                                                                                                                                                                                                                                                                                                            | 125                                                                                                                                                                                                                                                                                                           | 125  | 84%  | 2,00E-32 | 95%      | Francisella philomiragia subsp. philomiragia ATCC<br>25017, complete genome | 239                                                                                                 | 83% | 9,00E-60  | 90%      |     |
| <p>30S ribosomal protein S9 [Francisella<br/> philomiragia] &gt;gb EET21162.1  30S<br/> ribosomal protein S9 [Francisella<br/> philomiragia subsp. philomiragia ATCC<br/> 25015]</p>                                                                                                                                                                                                                                                                                                                                                                                                                                                                                                                                                                                                                                                                                                                                                                                                                                                                                                                                                                                                                                                                                                                                                                                                                                                                                                                                                                                                                                                                                                                                                                                                                                                                                                                                                                                                                                                                                                                                                                                                                                                                                                                                                                                                 | 84.3                                                                                                                                                                                                                                                                                                          | 84.3 | 85%  | 7,00E-19 | 93%      | Francisella philomiragia subsp. philomiragia ATCC<br>25017, complete genome | 209                                                                                                 | 86% | 7,00E-51  | 87%      |     |
| <p>type II secretion system protein/type IV-A<br/> pilus assembly ATPase PilB, partial<br/> [Francisella tularensis]</p>                                                                                                                                                                                                                                                                                                                                                                                                                                                                                                                                                                                                                                                                                                                                                                                                                                                                                                                                                                                                                                                                                                                                                                                                                                                                                                                                                                                                                                                                                                                                                                                                                                                                                                                                                                                                                                                                                                                                                                                                                                                                                                                                                                                                                                                             | 110                                                                                                                                                                                                                                                                                                           | 110  | 79%  | 2,00E-27 | 98%      | Francisella philomiragia subsp. philomiragia ATCC<br>25017, complete genome | 172                                                                                                 | 79% | 9,00E-40  | 86%      |     |

|                                                                                                                                                                                                                                                                                                                                                                                                                                                                                                                                                                                                                                                                                                                                                                                                                                                                                                                                                                                                                                                                                                                                                                                                                                                                                                                                                                                                                                                                                                                                                                                                                                                                                                                                                                                                                                                                                                                                                                                                                                                                                                                                                                                                                                                                                                                                 |                                                                                                                                                                                                                                                                        |      |      |          |          |                                                                             |                                                                             |     |          |          |     |
|---------------------------------------------------------------------------------------------------------------------------------------------------------------------------------------------------------------------------------------------------------------------------------------------------------------------------------------------------------------------------------------------------------------------------------------------------------------------------------------------------------------------------------------------------------------------------------------------------------------------------------------------------------------------------------------------------------------------------------------------------------------------------------------------------------------------------------------------------------------------------------------------------------------------------------------------------------------------------------------------------------------------------------------------------------------------------------------------------------------------------------------------------------------------------------------------------------------------------------------------------------------------------------------------------------------------------------------------------------------------------------------------------------------------------------------------------------------------------------------------------------------------------------------------------------------------------------------------------------------------------------------------------------------------------------------------------------------------------------------------------------------------------------------------------------------------------------------------------------------------------------------------------------------------------------------------------------------------------------------------------------------------------------------------------------------------------------------------------------------------------------------------------------------------------------------------------------------------------------------------------------------------------------------------------------------------------------|------------------------------------------------------------------------------------------------------------------------------------------------------------------------------------------------------------------------------------------------------------------------|------|------|----------|----------|-----------------------------------------------------------------------------|-----------------------------------------------------------------------------|-----|----------|----------|-----|
| >contig116307 length=191 numreads=8<br>AAATCTGTACACCAAGAGGCTTTCCGAGTCCCATATAGAGCATHCCATAGTT<br>TCCC<br>AATGTCATCTGTACACCTTTGTTATTACCATTTCAGTGATATCAATCCAGCA<br>CCAT<br>GCTCTTtgCAAAGAGCTCAAATGCACACTCACAAAAGCCTGCCATAGGAGCTAG<br>CACTA<br>CATTATTTCT<br>>contig46381 length=392 numreads=19<br>ATTTAGCTATAAGTTTTGTCAACAAGTTGGTGATGAAGGTAAGGTTATTTAAG<br>TggTA<br>TTAACTCATCAAGTCTAGAAGTTGGTAAAGAAAACTACTAATAGAGGTTGGT<br>TGCTA<br>ATATCGAaTATGTACAAGCAAAATCGGAAAGCTTGCCTTTCTGACAACTATTT<br>TGATT<br>GCATAACAATCTCTTTGGCTTAAGAAATGTTACAGATAAGGCAAAAGCACTAG<br>CTTCGA<br>TATGTAGAGTATTAACCAGGTGGTAGGTTACTAGTCTAGAGTTCTTAAGC<br>CTATAG<br>TACCAATGCTTTCTAAAATACAGATGAATCACTATTTAAAGCTTACCATTATG<br>GGTA<br>AAATCATCACTCAAGTCTGAAAGTTACAAA<br>>contig84512 length=241 numreads=10<br>ATACACCAAACTCAGTGATAGATCTGATTTTACCATGAACCTTATCACCAACTTG<br>AAAT<br>TATCTTCAAAGAAATCCCAAGGTTAGCTTACATTGCTTAATCACTAGAGAAAT<br>TCTGT<br>GTTTCTGAGCATCAACTCAAGTACGATACTCAACTCTTGCCAAATGATACA<br>GCTT<br>TGTGAGGGTTAACTCTTGTAGTCCAATCCATTCAGATGTGTAACAAGACC<br>TTCTA<br>T<br>>contig112895 length=195 numreads=10<br>GCTATAGCTAATGTCATGTTGCTAGCTgCAGCATTAACTAcGAAaCAATCCATAAAG<br>ATCT<br>AAATGTTCTTTCTTATTTTGGCATCTCTGTAAGCATATTGACCTGCTTAAATAC<br>CGC<br>TTGTTTAGCTACTATATACTCTGAAAGCAGCACCATAAACCCTTTGCTGTTT<br>TAA<br>GACTTCTTATGTCT<br>>contig128384 length=178 numreads=6<br>ATAGCGGATTGCTAGGAAATAAGTTGTTTAGATATTGATGATAGAAAAGCC<br>TATCT<br>ATTCTTTGGGGTATGCTAATAGGGGATAGTGAACAGGGAAAACCCCTAGATC<br>AATGAA<br>CCTATGAAACCAATTAAGAAATAGATAAACAGCTTTTATGATGATTATTTAAAG<br>ACT<br>>contig170526 length=140 numreads=6<br>ATTGAAAACTCTAGAAATTGGAGTTGATAGAGTAGTTGTLGGTAGTTTAGCTG<br>TTAAG<br>GATACAGCATTAAACGAAGAAAGTTTTTgAgAaATATGGCGCTGAAAAGATGTT<br>TAGCT<br>TTAGATGTTTTATCAAAGA<br>>contig146987 length=160 numreads=7<br>TTAACTATACAGCTTTAAGTGATGAAGATCACAAGTTGCTGAACATTTGGTG<br>TATGG<br>ggTGAAGAAATTTATgGgTAAAGTATATGATGGTATCCATAGAATAGCTTTT<br>TaTA<br>GACAAAGAAGGTAAGATTGATCATGCTTTAATAAGTTTA<br>>contig73718 length=267 numreads=12<br>TTAGCGAAACGATTTTGTGTTAGTTATCACTGATTCCTATAGTACAGACTAC<br>CATA<br>ATCTAGCTTTHCAACACCCATAAACTCAGCAATAGTTGGCCTATATCTGCAAAATG<br>TATC<br>TCTTGGGCAACAAATCTGATCAATATTTTACCACCAATAAGAACGGTACG<br>CAATC<br>ACGTGTGGTGCAGTACCAGGTGCAGTTGGATCACAACCATGGTCTGCTGCTAA<br>AATCAC<br>GATAGTATCTCATCTAAATATTTATC | tRNA-dihydrouridine synthase [Francisella<br>tularensis subsp. mediasiatica FSC147]<br>>ref WP_012429621.1  hypothetical<br>protein [Francisella tularensis]<br>>gb ACD31045.1  tRNA-dihydrouridine<br>synthase [Francisella tularensis subsp.<br>mediasiatica FSC147] | 124  | 124  | 84%      | 2,00E-32 | 87%                                                                         | Francisella philomiragia subsp. philomiragia ATCC<br>25017, complete genome | 159 | 85%      | 7,00E-36 | 82% |
| Ubiquinone/menaquinone biosynthesis<br>methyltransferase UbiE [Francisella sp.<br>TX077308] >ref WP_013922247.1 <br>ubiquinone/menaquinone biosynthesis<br>methyltransferase [Francisella sp.<br>TX077308] >gb AEI35399.1 <br>Ubiquinone/menaquinone biosynthesis<br>methyltransferase UbiE [Francisella sp.<br>TX077308]                                                                                                                                                                                                                                                                                                                                                                                                                                                                                                                                                                                                                                                                                                                                                                                                                                                                                                                                                                                                                                                                                                                                                                                                                                                                                                                                                                                                                                                                                                                                                                                                                                                                                                                                                                                                                                                                                                                                                                                                       | 256                                                                                                                                                                                                                                                                    | 256  | 90%  | 4,00E-83 | 93%      | Francisella philomiragia subsp. philomiragia ATCC<br>25017, complete genome | 326                                                                         | 90% | 1,00E-85 | 82%      |     |
| 30S ribosomal protein S1 [Francisella sp.<br>TX077308] >ref WP_013921941.1  30S<br>ribosomal protein S1 [Francisella sp.<br>TX077308] >gb AEI35080.1  SSU ribosomal<br>protein S1p [Francisella sp. TX077308]                                                                                                                                                                                                                                                                                                                                                                                                                                                                                                                                                                                                                                                                                                                                                                                                                                                                                                                                                                                                                                                                                                                                                                                                                                                                                                                                                                                                                                                                                                                                                                                                                                                                                                                                                                                                                                                                                                                                                                                                                                                                                                                   | 150                                                                                                                                                                                                                                                                    | 298  | 92%  | 4,00E-41 | 89%      | Francisella philomiragia subsp. philomiragia ATCC<br>25017, complete genome | 279                                                                         | 91% | 6,00E-72 | 88%      |     |
| 50S ribosomal protein L20 [Francisella<br>noatunensis subsp. orientalis str. Toba 04]                                                                                                                                                                                                                                                                                                                                                                                                                                                                                                                                                                                                                                                                                                                                                                                                                                                                                                                                                                                                                                                                                                                                                                                                                                                                                                                                                                                                                                                                                                                                                                                                                                                                                                                                                                                                                                                                                                                                                                                                                                                                                                                                                                                                                                           | 126                                                                                                                                                                                                                                                                    | 126  | 83%  | 3,00E-35 | 98%      | Francisella philomiragia subsp. philomiragia ATCC<br>25017, complete genome | 261                                                                         | 82% | 2,00E-66 | 91%      |     |
| hypothetical protein [Francisella novicida]<br>>gb EDN38529.1  predicted protein<br>[Francisella novicida GA99-3548]                                                                                                                                                                                                                                                                                                                                                                                                                                                                                                                                                                                                                                                                                                                                                                                                                                                                                                                                                                                                                                                                                                                                                                                                                                                                                                                                                                                                                                                                                                                                                                                                                                                                                                                                                                                                                                                                                                                                                                                                                                                                                                                                                                                                            | 119                                                                                                                                                                                                                                                                    | 119  | 88%  | 2,00E-30 | 93%      | Francisella philomiragia subsp. philomiragia ATCC<br>25017, complete genome | 257                                                                         | 89% | 2,00E-65 | 93%      |     |
| phosphoribosylformimino-5-<br>aminoimidazole carboxamide ribotide<br>isomerase [Francisella sp. TX077308]                                                                                                                                                                                                                                                                                                                                                                                                                                                                                                                                                                                                                                                                                                                                                                                                                                                                                                                                                                                                                                                                                                                                                                                                                                                                                                                                                                                                                                                                                                                                                                                                                                                                                                                                                                                                                                                                                                                                                                                                                                                                                                                                                                                                                       | 85.9                                                                                                                                                                                                                                                                   | 85.9 | 76%  | 6,00E-19 | 98%      | Francisella philomiragia subsp. philomiragia ATCC<br>25017, complete genome | 191                                                                         | 76% | 2,00E-45 | 91%      |     |
| thioredoxin-dependent thiol peroxidase<br>[Francisella philomiragia] >gb EET20615.1 <br>bacterioferritin comigratory protein<br>[Francisella philomiragia subsp.<br>philomiragia ATCC 25015]                                                                                                                                                                                                                                                                                                                                                                                                                                                                                                                                                                                                                                                                                                                                                                                                                                                                                                                                                                                                                                                                                                                                                                                                                                                                                                                                                                                                                                                                                                                                                                                                                                                                                                                                                                                                                                                                                                                                                                                                                                                                                                                                    | 106                                                                                                                                                                                                                                                                    | 106  | 86%  | 4,00E-27 | 93%      | Francisella philomiragia subsp. philomiragia ATCC<br>25017, complete genome | 211                                                                         | 84% | 2,00E-51 | 91%      |     |
| phosphopentomutase [Francisella<br>philomiragia] >gb EET20772.1 <br>phosphopentomutase [Francisella<br>philomiragia subsp. philomiragia ATCC<br>25015]                                                                                                                                                                                                                                                                                                                                                                                                                                                                                                                                                                                                                                                                                                                                                                                                                                                                                                                                                                                                                                                                                                                                                                                                                                                                                                                                                                                                                                                                                                                                                                                                                                                                                                                                                                                                                                                                                                                                                                                                                                                                                                                                                                          | 130                                                                                                                                                                                                                                                                    | 130  | 100% | 2,00E-34 | 86%      | Francisella philomiragia subsp. philomiragia ATCC<br>25017, complete genome | 165                                                                         | 72% | 2,00E-37 | 81%      |     |

|                                                                                                                                                                                                                                                                                                    |                                                                                                                                                                                                                                                                                                                                                   |      |      |     |          |      |                                                                             |      |     |          |     |
|----------------------------------------------------------------------------------------------------------------------------------------------------------------------------------------------------------------------------------------------------------------------------------------------------|---------------------------------------------------------------------------------------------------------------------------------------------------------------------------------------------------------------------------------------------------------------------------------------------------------------------------------------------------|------|------|-----|----------|------|-----------------------------------------------------------------------------|------|-----|----------|-----|
| >contig191739 length=118 numreads=6<br>CTCTTGCTCTACCTGACCTTCTGCTCCAAGGTTTTGCACCCACCACGACACT<br>TCTG<br>ATCTAGTTTTTTCGCTTTAGTTCCTGACGACACCTgCCATATAGGCACTACA<br>AC                                                                                                                                  | 50S ribosomal protein L4 [Francisella<br>noatunensis subsp. orientalis str. Toba 04]                                                                                                                                                                                                                                                              | 80.9 | 80.9 | 75% | 2,00E-17 | 100% | Francisella philomiragia subsp. philomiragia ATCC<br>25017, complete genome | 169  | 75% | 8,00E-39 | 92% |
| >contig97494 length=217 numreads=8<br>CCGACAAATAGCTTCGTTAAAATGACCTTAAATTCGTTAAAAGATGGAACCAT<br>AGCAG<br>AGGATACGAAAATAACAGACACTTTTGTATTCAAATGGGTCAAGGATGCTT<br>TACCG<br>ATAAAGTTGAAAATGAACTTATAGTTCGAAATGGTGACAGTAAACGAGTGG<br>TGTTAA<br>TGCCAGATGAAGCTTTTGGTGAAAAACATCCTTCTAG                     | peptidyl-prolyl cis-trans isomerase<br>[Francisella philomiragia] >gb EET20256.1 <br>peptidyl-prolyl cis-trans isomerase<br>[Francisella philomiragia subsp.<br>philomiragia ATCC 25015]                                                                                                                                                          | 139  | 139  | 87% | 1,00E-39 | 88%  | Francisella philomiragia subsp. philomiragia ATCC<br>25017, complete genome | 193  | 83% | 8,00E-46 | 84% |
| >contig87198 length=236 numreads=8<br>AAAAGAATTTGTATAGCAGGAATGAATGTTATACCGGCCAGATTTTAAAGAAA<br>CTGATA<br>AATAATCTCAAAATTTTGAGCTAGTTGGAAGCTAGGTCTATCAATAAATAA<br>AAGAT<br>CAATATAGATATTTTGGTAGCTAAATAGTGAATTTCCAGATGGATTTTTT<br>ATTA<br>TTAGCTACACCTGCAGATATTTCTATAGAAATCGTAGATAAGATCAATCAAAGA<br>A | N-acetyl-gamma-glutamyl-phosphate<br>reductase [Francisella philomiragia subsp.<br>philomiragia ATCC 25017]<br>>ref WP_012280023.1  N-acetyl-gamma-<br>glutamyl-phosphate reductase [Francisella<br>philomiragia] >gb ABZ86774.1  N-acetyl-<br>gamma-glutamyl-phosphate reductase<br>[Francisella philomiragia subsp.<br>philomiragia ATCC 25017] | 115  | 115  | 79% | 8,00E-29 | 68%  | Francisella philomiragia subsp. philomiragia ATCC<br>25017, complete genome | 161  | 70% | 3,00E-36 | 81% |
| >contig136666 length=169 numreads=7<br>TTTGATTATAGTATCATCTATAGCTCCAGCATATAGTTGTACCAGCAACCACT<br>CAA<br>CATCATCATGTATCACAACACGGCCAAAGCTGGAAATTTTGTCCAACCATC<br>ATCAT<br>CTCtGgCATTACCAAAACCcTACAACCAACTTACTGAGTTTTGATGAAT                                                                           | UDP-3-O-[3-hydroxymyristoyl] glucosamine<br>N-acyltransferase [Francisella sp. TX077308]<br>>ref WP_013922561.1  UDP-3-O-(3-<br>hydroxymyristoyl) glucosamine N-<br>acyltransferase [Francisella sp. TX077308]<br>>gb AEI35721.1  UDP-3-O-(3-<br>hydroxymyristoyl) glucosamine N-<br>acyltransferase [Francisella sp. TX077308]                   | 110  | 110  | 80% | 2,00E-27 | 91%  | Francisella philomiragia subsp. philomiragia                                | 132  | 79% | 1,00E-27 | 81% |
| >contig122027 length=185 numreads=9<br>CTATGGTATTAGAAAATATTGATATGAAGAAATCTAAGTACATCCCTGCTAG<br>CTTGT<br>TTACCAAGTCAAGCTACTTTTTCCTTCTAGCAATATCTCAGCTTTTCAATCAc<br>ACT<br>TTGTATCTTGCTGTTTATATGCTTTTGTAGCTGATTGCTGATGCTTTGATGGC<br>AAGG<br>TTGCT                                                     | CDP-alcohol phosphatidyltransferase<br>[Francisella philomiragia subsp.<br>philomiragia ATCC 25017]<br>>ref WP_012279958.1  CDP-alcohol<br>phosphatidyltransferase [Francisella<br>philomiragia] >gb ABZ86691.1  CDP-<br>alcohol phosphatidyltransferase<br>[Francisella philomiragia subsp.<br>philomiragia ATCC 25017]                          | 75.5 | 75.5 | 79% | 9,00E-15 | 90%  | Francisella philomiragia subsp. philomiragia ATCC<br>25017, complete genome | 128  | 75% | 2,00E-26 | 80% |
| >contig157653 length=150 numreads=6<br>CTTTACCTGGTGCAAGGTAAATACCACTAccttGTAGTAAAGTAATAGCTTCATTA<br>GTCA<br>CAGGCAATGTAGATGCTTCAACAACATATTAACACCGTTGCTTAATGTCTCT<br>GCTT<br>CTTTTTCAAAATTCATTTTGTGGTGCAG                                                                                            | NADP-specific glutamate dehydrogenase<br>[Francisella sp. TX077308]<br>>ref WP_013922474.1  glutamate<br>dehydrogenase [Francisella sp. TX077308]<br>>gb AEI35633.1  NADP-specific glutamate<br>dehydrogenase [Francisella sp. TX077308]                                                                                                          | 79.0 | 79.0 | 81% | 1,00E-15 | 82%  | Francisella philomiragia subsp. philomiragia ATCC<br>25017, complete genome | 82.4 | 29% | 1,00E-12 | 94% |
| >contig95932 length=220 numreads=7<br>CATCTTTTTCTTAAACAAGTATCTCTTAAATGTAGTCCAGGAGTTTCAGGTATC<br>ATCT<br>TGCCAATCATATCACCAGCAATCAACTTCCGCCATCACACGCACACTACCTCG<br>TACTA<br>CACCCCTAGCTGCCATAGTACCGTAAGTATACTGTCCAACACTTGTCTACC<br>GTACT<br>TCTGCTCTACATTTGATAACTCTATCACGACCCTCTAT                   | DNA-directed DNA polymerase [Francisella<br>philomiragia subsp. philomiragia ATCC<br>25017] >ref WP_012279847.1  DNA<br>polymerase III subunit alpha [Francisella<br>philomiragia] >gb ABZ86566.1  DNA-<br>directed DNA polymerase [Francisella<br>philomiragia subsp. philomiragia ATCC<br>25017]                                                | 132  | 132  | 77% | 2,00E-33 | 93%  | Francisella philomiragia subsp. philomiragia ATCC<br>25017, complete genome | 211  | 73% | 2,00E-51 | 87% |
| >contig146290 length=159 numreads=6<br>GCTAAACTATTAATCTTATGAGTAATGCAATGATCTACTTATAATGACCGAAA<br>CTCA<br>GATCTTGGAGATCCAGATTTTGTAAAATGGATATTAaGgTCTTGTCTAAAA<br>AGTAT<br>GCAAAACAAGTAGCAGAAAAATAACGACAGATAAACAT                                                                                     | gamma-glutamyltransferase [Francisella<br>novicida] >gb EDX19567.1  gamma-<br>glutamyltransferase [Francisella tularensis<br>subsp. novicida FTE]                                                                                                                                                                                                 | 104  | 104  | 79% | 2,00E-24 | 89%  | Francisella philomiragia subsp. philomiragia ATCC<br>25017, complete genome | 156  | 77% | 9,00E-35 | 84% |
| >contig140924 length=166 numreads=7<br>AAAGAAGTTGATGGCGTAATGCACGAACCACTTgAGCAAGCTATTATTGATGT<br>GATGAC<br>ACTTCCAAAGTGTGTGATGGAGAGAATGGTCTCGCTCAAGGTGAGCTTAAA<br>AATATG<br>GAACCTGATGGTAAAGCTGTGTAACCTGAGTTTATAATTCAT                                                                              | GTP-binding protein TypA [Fangia<br>hongkongensis and Francisella philomiragia<br>subsp. philomiragia ATCC 25017]                                                                                                                                                                                                                                 | 97.4 | 97.4 | 85% | 7,00E-22 | 82%  | Francisella philomiragia subsp. philomiragia ATCC<br>25017, complete genome | 141  | 86% | 2,00E-30 | 82% |

|                                                                                                                                                                                                                                                                                                                                                                                                                                                                                                                                                                                                                                                                                                                                                                                                                                                                                                                                                                                                                                                                                                                                                                                                      |                                                                                                                                                                                                                                                                                                                       |                  |              |                    |                |                 |                                                                          |              |                    |                |                 |
|------------------------------------------------------------------------------------------------------------------------------------------------------------------------------------------------------------------------------------------------------------------------------------------------------------------------------------------------------------------------------------------------------------------------------------------------------------------------------------------------------------------------------------------------------------------------------------------------------------------------------------------------------------------------------------------------------------------------------------------------------------------------------------------------------------------------------------------------------------------------------------------------------------------------------------------------------------------------------------------------------------------------------------------------------------------------------------------------------------------------------------------------------------------------------------------------------|-----------------------------------------------------------------------------------------------------------------------------------------------------------------------------------------------------------------------------------------------------------------------------------------------------------------------|------------------|--------------|--------------------|----------------|-----------------|--------------------------------------------------------------------------|--------------|--------------------|----------------|-----------------|
| >contig43527 length=417 numreads=24<br>TATTACAATAaTGGTGAGAAAAAGACATTGAGTCATTAACCTGTGTATATG<br>ATGGC<br>TAATTCTGGTGCaaGGgTTCTTATAACCAATGCGTCAGTTAGCAGGTATGCGT<br>GGATT<br>GATGGCTAAACAGATGGTACGATGACGAGACTGCTATTACTGCAAACCTTAG<br>AgAAGG<br>CTGTGCACTACTCAACTACTTACATCTACGCATGGTCTGCTAAAGGCTTGCCG<br>ATAC<br>AGCTCTTAAGACTGCTAACGCAGGTTACTTAACGCGTAGACTAGTAGATGATG<br>TCAAGA<br>TTTAGTTATCATCGAAGAAGATTGGTACAGAAAGACGGACTTATGTTCTCAGCT<br>ATTGT<br>TGAAGACGGTGAAGTTAAAGTACCTAGCTGAAAGAGCGTTAGGTAGAACCTT<br>AGC                                                                                                                                                                                                                                                                                                                                                                                                                                                                                                                                                                                                                                                                                        | DNA-directed RNA polymerase subunit beta' [Francisella cf. novicida 3523]<br>>ref WP_014548914.1  DNA-directed RNA polymerase subunit beta' [Francisella novicida] >gb AEE26935.1  DNA-directed RNA polymerase beta' subunit [Francisella cf. novicida 3523]                                                          | 275              | 275          | 91%                | 8,00E-83       | 96%             | Francisella philomiragia subsp. philomiragia ATCC 25017, complete genome | 446          | 90%                | 1,00E-121      | 86%             |
| <b>Contigs</b>                                                                                                                                                                                                                                                                                                                                                                                                                                                                                                                                                                                                                                                                                                                                                                                                                                                                                                                                                                                                                                                                                                                                                                                       | <b>Blastx</b>                                                                                                                                                                                                                                                                                                         | <b>Max score</b> | <b>Score</b> | <b>Query Cover</b> | <b>e-value</b> | <b>Identity</b> | <b>Blastn</b>                                                            | <b>Score</b> | <b>Query Cover</b> | <b>e-value</b> | <b>Identity</b> |
| >contig79157 length=253 numreads=13<br>CTTCAGGATCATGAGTAAAACATTTGTGCGACCTAGTTCTCAAAGCAATTTT<br>ACAG<br>AGGCCAAATTAACCCACAACAATCTTATTGCTCATATAAATCCCTTTTGAGC<br>TTGG<br>AATCTCACCTATACCCTTTAGCAACCTGCTTTAAGAACTTCACTAAACCTT<br>TAAA<br>GCAAAGCTTCTATCTTATGATGCGTATTTCCAGCACTTGTATGATGATGTTG<br>CCTT<br>TAGACCTTCAGCA                                                                                                                                                                                                                                                                                                                                                                                                                                                                                                                                                                                                                                                                                                                                                                                                                                                                                  | imidazole glycerol-phosphate dehydratase/histidinol phosphatase [Francisella philomiragia subsp. philomiragia ATCC 25017]<br>>ref WP_012279625.1  imidazoleglycerol-phosphate dehydratase [Francisella philomiragia] >gb AB286286.1  Histidinol-phosphatase [Francisella philomiragia subsp. philomiragia ATCC 25017] | 96.7             | 96.7         | 49%                | 8,00E-22       | 92%             | Francisella philomiragia subsp. philomiragia ATCC 25017, complete genome | 274          | 81%                | 4,00E-70       | 86%             |
| >contig180890 length=130 numreads=6<br>TGTCAGCATAGATGAAATTAATCTACTATGATGATAATCCACATCTTTCTCTAT<br>AAGC<br>TTCTATTTCTGCTGACGCGAAGATCTTAATTTCTGTAACGAGCTCTGTAAG<br>GAGG<br>ATTAACCTTC<br>>contig61537 length=308 numreads=11<br>TTCAGCTAAAGATTTTGAAGCATGCACACAAGCATAATCAAACCTTATACCTTGA<br>CCAAAT<br>AGGATTTGGCCCTCCGCAAGTATTACTTTTTGTTATCAGTAATATCAGATT<br>CACA<br>ATCTCTTATGATCTCTTATGAGAAAATGCTCATAAAGTGGATACATATAGAA<br>GATGA<br>AGAATCAAACCTCAGCTGCACAAGATCAaCCTTCTATATGTTGGATAAATCTCTT<br>TACC<br>ATAACGATAGTTACGTACATATTTTTCTGTTCTACCAACTAGCTTTGCAATTTCTG<br>CATC<br>AGAAAAAC<br>>contig117499 length=190 numreads=7<br>CCACTCTATCTGTCATCAAGATTAATCTGATACCTTTTTCTTGAAGACTTCAAGCT<br>GAG<br>GGTTGTTAAAGCTGCTTATAGCTATCTGCTGTGATGATGATAGATAGTATCCTG<br>CTCT<br>CTTTCATACGAGAGATATAGTCTGCTAAAGAACTGTTGCTTAGCATCAGTACT<br>CTCTG<br>TAGTTGTA<br>>contig70644 length=276 numreads=13<br>CAGTATGATCTCCTGGATGTTAGTGTATCTGTTATGATGACACCTAATCCTGAC<br>GCTT<br>GAATTATAGAGTTTTTACCCCAATTAATATATTACAAACGATACTAGCATTCCAA<br>GCAC<br>CACAGCAGCAGTAATGACCAAGTACATAGTATGCACTTACAGCTGGGAATA<br>AGAATT<br>TTTTCCATTTGTGAAACCTTTTAGCTGCATATTAAGCTGCGCCGAAGCTTTAGCTCA<br>TCTG<br>GAATTGCTGAAGCACGGCAATCACATTGAATAATA | hypothetical protein Fphi_1895 [Francisella philomiragia subsp. philomiragia ATCC 25017] >ref WP_012281160.1  hypothetical protein [Francisella philomiragia]<br>>gb AB288119.1  conserved hypothetical protein [Francisella philomiragia subsp. philomiragia ATCC 25017]                                             | 89.0             | 89.0         | 77%                | 5,00E-19       | 98%             | Francisella philomiragia subsp. philomiragia ATCC 25017, complete genome | 226          | 78%                | 5,00E-56       | 98%             |
| >contig61537 length=308 numreads=11<br>TTCAGCTAAAGATTTTGAAGCATGCACACAAGCATAATCAAACCTTATACCTTGA<br>CCAAAT<br>AGGATTTGGCCCTCCGCAAGTATTACTTTTTGTTATCAGTAATATCAGATT<br>CACA<br>ATCTCTTATGATCTCTTATGAGAAAATGCTCATAAAGTGGATACATATAGAA<br>GATGA<br>AGAATCAAACCTCAGCTGCACAAGATCAaCCTTCTATATGTTGGATAAATCTCTT<br>TACC<br>ATAACGATAGTTACGTACATATTTTTCTGTTCTACCAACTAGCTTTGCAATTTCTG<br>CATC<br>AGAAAAAC<br>>contig117499 length=190 numreads=7<br>CCACTCTATCTGTCATCAAGATTAATCTGATACCTTTTTCTTGAAGACTTCAAGCT<br>GAG<br>GGTTGTTAAAGCTGCTTATAGCTATCTGCTGTGATGATGATAGATAGTATCCTG<br>CTCT<br>CTTTCATACGAGAGATATAGTCTGCTAAAGAACTGTTGCTTAGCATCAGTACT<br>CTCTG<br>TAGTTGTA<br>>contig70644 length=276 numreads=13<br>CAGTATGATCTCCTGGATGTTAGTGTATCTGTTATGATGACACCTAATCCTGAC<br>GCTT<br>GAATTATAGAGTTTTTACCCCAATTAATATATTACAAACGATACTAGCATTCCAA<br>GCAC<br>CACAGCAGCAGTAATGACCAAGTACATAGTATGCACTTACAGCTGGGAATA<br>AGAATT<br>TTTTCCATTTGTGAAACCTTTTAGCTGCATATTAAGCTGCGCCGAAGCTTTAGCTCA<br>TCTG<br>GAATTGCTGAAGCACGGCAATCACATTGAATAATA                                                                                                                                                                                       | carbamoyl phosphate synthase large subunit [Francisella philomiragia]<br>>gb EET20567.1  carbamoyl-phosphate synthase large chain [Francisella philomiragia subsp. philomiragia ATCC 25015]                                                                                                                           | 191              | 231          | 84%                | 7,00E-54       | 82%             | Francisella philomiragia subsp. philomiragia ATCC 25017, complete genome | 198          | 82%                | 3,00E-47       | 79%             |
| >contig117499 length=190 numreads=7<br>CCACTCTATCTGTCATCAAGATTAATCTGATACCTTTTTCTTGAAGACTTCAAGCT<br>GAG<br>GGTTGTTAAAGCTGCTTATAGCTATCTGCTGTGATGATGATAGATAGTATCCTG<br>CTCT<br>CTTTCATACGAGAGATATAGTCTGCTAAAGAACTGTTGCTTAGCATCAGTACT<br>CTCTG<br>TAGTTGTA<br>>contig70644 length=276 numreads=13<br>CAGTATGATCTCCTGGATGTTAGTGTATCTGTTATGATGACACCTAATCCTGAC<br>GCTT<br>GAATTATAGAGTTTTTACCCCAATTAATATATTACAAACGATACTAGCATTCCAA<br>GCAC<br>CACAGCAGCAGTAATGACCAAGTACATAGTATGCACTTACAGCTGGGAATA<br>AGAATT<br>TTTTCCATTTGTGAAACCTTTTAGCTGCATATTAAGCTGCGCCGAAGCTTTAGCTCA<br>TCTG<br>GAATTGCTGAAGCACGGCAATCACATTGAATAATA                                                                                                                                                                                                                                                                                                                                                                                                                                                                                                                                                                                      | heat shock protein 90 [Francisella noatunensis subsp. orientalis str. Toba 04]                                                                                                                                                                                                                                        | 118              | 118          | 82%                | 4,00E-29       | 89%             | Francisella philomiragia subsp. philomiragia ATCC 25017, complete genome | 195          | 78%                | 2,00E-46       | 86%             |
| >contig132469 length=174 numreads=6<br>AAAGCTCTAGCAATGTTAATAGAGTGTGAGACTCTGGAAGcAaCTGGTGAGTT<br>GATGG<br>ATGAGATCAATGTAATGAACATGATTACCAAGTGGTTGGGGTACAGGTTCC<br>CTGCAT<br>ATTTCCAGGCATCTACAACCTTCCCTGAGCAAAACCACTACTCAAATAGAGTAT                                                                                                                                                                                                                                                                                                                                                                                                                                                                                                                                                                                                                                                                                                                                                                                                                                                                                                                                                                     | ABC transporter permease [Francisella sp. TX077308] >ref WP_013921923.1  ABC transporter permease [Francisella sp. TX077308] >gb AEI35062.1  ABC transporter, permease protein [Francisella sp. TX077308]                                                                                                             | 166              | 166          | 91%                | 4,00E-46       | 87%             | Francisella philomiragia subsp. philomiragia ATCC 25017, complete genome | 180          | 66%                | 8,00E-42       | 83%             |
| >contig132469 length=174 numreads=6<br>AAAGCTCTAGCAATGTTAATAGAGTGTGAGACTCTGGAAGcAaCTGGTGAGTT<br>GATGG<br>ATGAGATCAATGTAATGAACATGATTACCAAGTGGTTGGGGTACAGGTTCC<br>CTGCAT<br>ATTTCCAGGCATCTACAACCTTCCCTGAGCAAAACCACTACTCAAATAGAGTAT                                                                                                                                                                                                                                                                                                                                                                                                                                                                                                                                                                                                                                                                                                                                                                                                                                                                                                                                                                     | glycosyl hydrolase family chitinase [Francisella philomiragia subsp. philomiragia ATCC 25017]                                                                                                                                                                                                                         | 97.8             | 97.8         | 75%                | 7,00E-22       | 90%             | Francisella philomiragia subsp. philomiragia ATCC 25017, complete genome | 152          | 81%                | 1,00E-33       | 84%             |

|                                                                                                                                                                                                                                                                                                                                                                                                                                                                                                                                                                                                                                                                                                                                                                                                                                                                                                                                                                                                                                                            |                                                                                                                                                                                                                                                                                                                       |      |      |     |          |     |                                                                             |      |     |          |     |
|------------------------------------------------------------------------------------------------------------------------------------------------------------------------------------------------------------------------------------------------------------------------------------------------------------------------------------------------------------------------------------------------------------------------------------------------------------------------------------------------------------------------------------------------------------------------------------------------------------------------------------------------------------------------------------------------------------------------------------------------------------------------------------------------------------------------------------------------------------------------------------------------------------------------------------------------------------------------------------------------------------------------------------------------------------|-----------------------------------------------------------------------------------------------------------------------------------------------------------------------------------------------------------------------------------------------------------------------------------------------------------------------|------|------|-----|----------|-----|-----------------------------------------------------------------------------|------|-----|----------|-----|
| >contig100652 length=212 numreads=10<br>TTTTAGCTATATCTGCCATAGTTATGCTAAAACCTGCTTTTCTCTATCTATGT<br>CAA<br>TATCAACAACCTGGTGTCAAACTTAAGTCACTTTGCGCAAAAAACAACATACC<br>ACTGC<br>TCATCATTTTATCTATCAGCTATTTGTTGGTTTGTATAGCTTCATAGTCATTAA<br>CAC<br>TTTGAATAACAAGAGACATTGGTGACACGCA<br>>contig67462 length=286 numreads=14<br>CTTTGTAATTACAGAAGACTTTACTCATTAAACAACAAACCAAGTGTACTA<br>GCAGC<br>AGGGTAACTCTGGCATTAGTCGTATAGTCGGCAAGCAACTCATGCAGGACA<br>TATAGT<br>CGCTGCTAATTTGATCATATCATGTTGAGTAGTGGTGGCTTTTATTCTTAA<br>TGGT<br>CGCGATGGCATACATCAATCTTATGGAAGATCgTAATGATTTGAAAACTCAA<br>AGCAT<br>ACTAGTCCGAGCAGGGTTAGTATCTGGAGTTTTTGGCTTACA<br>>contig125719 length=181 numreads=8<br>CGATAACTTGTATAGGGGAAGTCTCTTCAACCCATCAACCATATAGCAC<br>ACCTT<br>GAGAAAGACCATGAGCAGTAtcAACTACAACACATCAACCTCTCTGCAAG<br>AGCTG<br>TAACTCTTCTTAGTATTTGACAGCAGTACCAACAGCAGCAGCTCTCAAGCG<br>ACCAA<br>G                                                                                                                                                                                  | multidrug transporter AcrB [Francisella<br>philomiragia] >gb EET20764.1  RND efflux<br>transporter [Francisella philomiragia subsp.<br>philomiragia ATCC 25015]                                                                                                                                                       | 134  | 134  | 86% | 4,00E-34 | 88% | Francisella philomiragia subsp. philomiragia ATCC<br>25017, complete genome | 147  | 76% | 7,00E-32 | 81% |
| >contig148374 length=157 numreads=7<br>AGCGTATGGTGTGACATAAAGATAACCTGGTATTTGGCATGATAAACAATACC<br>AAAGC<br>AATATTTGgATTATCTACAGCATTGGTGAGCTAGATATGTGACAAAGATTGC<br>ATTAT<br>GTATATCCATACCCCTCATGTTGATAAAAATTGTACCAC                                                                                                                                                                                                                                                                                                                                                                                                                                                                                                                                                                                                                                                                                                                                                                                                                                          | sodium:proton antiporter [Francisella<br>philomiragia] >gb EET20661.1  Na <sup>+</sup> :H <sup>+</sup><br>antiporter [Francisella philomiragia subsp.<br>philomiragia ATCC 25015]                                                                                                                                     | 156  | 156  | 88% | 5,00E-43 | 79% | Francisella philomiragia subsp. philomiragia ATCC<br>25017, complete genome | 145  | 88% | 3,00E-31 | 76% |
| >contig167076 length=143 numreads=7<br>TTTGGCCTTTTACCAGTCTGATGAGCTGTTGGCAAACTATTGAACAA<br>TTTAT<br>TCCTGCTTTAAAAAATGAAGTACGCAATATGCTTGGTTCATTTGCTGCTCGTG<br>AAGG<br>TATTTCATAAAGACTTACGCC<br>>contig140594 length=165 numreads=8<br>TTCAGTGGCTATCATAAGGcAGTTTTGAAgGTGGTCAAATGCCTTTGCAAAGA<br>AGATT<br>ACCAAAATTTGGTTTACTTCCCACTAAAAGATTTCAGCTGAAGTTAGGCTA<br>CATGA<br>ATTAATAATGTAGATGCTGATGTTGAACAATGATGTGCTTAA<br>>contig174035 length=137 numreads=6<br>ATGAATTAATAAATACTAAAGAAAGATTATGAGCTAGAAAATATAGagCTgTATAT<br>GGTG<br>GTCACAAGATATTGAACAAGCTACTAAAATTTGGTTAGCAATTGCTTGGTCA<br>AAATT<br>ATGCTAAAGATTTACAA<br>>contig166790 length=143 numreads=6<br>AGTTGTTGATAAAGTCAAGGTTAAAGTGAACAATGAGGTCCTTGGTAA<br>TCCTGC<br>AGCAGAGGTTGTAGCTATGAGAAGAAAGCGCATGTGATGTAATTGTGCTAG<br>GTTCTCA<br>TGCAACTCATGGTATAAATTTAC<br>>contig124775 length=180 numreads=6<br>TAATCAAAGGAGAGATATAAGTGAAGTATAAATCAGGGTTTAAAGGTTTGG<br>GTTACG<br>AGTTAAGGATATATGTTTTTATGTTGCTCTAaGATATTAAGTACTGCTTATA<br>AAAC<br>TTAGGTTCAAATCTACACCGTATTTTACATTCACCATCTACTGATAAaaCTT<br>TGC | inosine-5'-monophosphate dehydrogenase<br>[Francisella cf. novicida 3523]                                                                                                                                                                                                                                             | 113  | 113  | 84% | 6,00E-28 | 90% | Francisella philomiragia subsp. philomiragia ATCC<br>25017, complete genome | 141  | 71% | 3,00E-30 | 84% |
| >contig174035 length=137 numreads=6<br>ATGAATTAATAAATACTAAAGAAAGATTATGAGCTAGAAAATATAGagCTgTATAT<br>GGTG<br>GTCACAAGATATTGAACAAGCTACTAAAATTTGGTTAGCAATTGCTTGGTCA<br>AAATT<br>ATGCTAAAGATTTACAA<br>>contig166790 length=143 numreads=6<br>AGTTGTTGATAAAGTCAAGGTTAAAGTGAACAATGAGGTCCTTGGTAA<br>TCCTGC<br>AGCAGAGGTTGTAGCTATGAGAAGAAAGCGCATGTGATGTAATTGTGCTAG<br>GTTCTCA<br>TGCAACTCATGGTATAAATTTAC<br>>contig124775 length=180 numreads=6<br>TAATCAAAGGAGAGATATAAGTGAAGTATAAATCAGGGTTTAAAGGTTTGG<br>GTTACG<br>AGTTAAGGATATATGTTTTTATGTTGCTCTAaGATATTAAGTACTGCTTATA<br>AAAC<br>TTAGGTTCAAATCTACACCGTATTTTACATTCACCATCTACTGATAAaaCTT<br>TGC                                                                                                                                                                                                                                                                                                                                                                                                                     | ribosomal protein S12p Asp88<br>methylthiotransferase [Francisella sp.<br>TX077308] >ref WP_013922163.1 <br>ribosomal protein S12<br>methylthiotransferase [Francisella sp.<br>TX077308] >gb AEI35313.1  Ribosomal<br>protein S12p Asp88 methylthiotransferase<br>[Francisella sp. TX077308]                          | 90.9 | 90.9 | 61% | 6,00E-20 | 93% | Francisella philomiragia subsp. philomiragia ATCC<br>25017, complete genome | 130  | 73% | 5,00E-27 | 82% |
| >contig167076 length=143 numreads=7<br>TTTGGCCTTTTACCAGTCTGATGAGCTGTTGGCAAACTATTGAACAA<br>TTTAT<br>TCCTGCTTTAAAAAATGAAGTACGCAATATGCTTGGTTCATTTGCTGCTCGTG<br>AAGG<br>TATTTCATAAAGACTTACGCC<br>>contig140594 length=165 numreads=8<br>TTCAGTGGCTATCATAAGGcAGTTTTGAAgGTGGTCAAATGCCTTTGCAAAGA<br>AGATT<br>ACCAAAATTTGGTTTACTTCCCACTAAAAGATTTCAGCTGAAGTTAGGCTA<br>CATGA<br>ATTAATAATGTAGATGCTGATGTTGAACAATGATGTGCTTAA<br>>contig174035 length=137 numreads=6<br>ATGAATTAATAAATACTAAAGAAAGATTATGAGCTAGAAAATATAGagCTgTATAT<br>GGTG<br>GTCACAAGATATTGAACAAGCTACTAAAATTTGGTTAGCAATTGCTTGGTCA<br>AAATT<br>ATGCTAAAGATTTACAA<br>>contig166790 length=143 numreads=6<br>AGTTGTTGATAAAGTCAAGGTTAAAGTGAACAATGAGGTCCTTGGTAA<br>TCCTGC<br>AGCAGAGGTTGTAGCTATGAGAAGAAAGCGCATGTGATGTAATTGTGCTAG<br>GTTCTCA<br>TGCAACTCATGGTATAAATTTAC<br>>contig124775 length=180 numreads=6<br>TAATCAAAGGAGAGATATAAGTGAAGTATAAATCAGGGTTTAAAGGTTTGG<br>GTTACG<br>AGTTAAGGATATATGTTTTTATGTTGCTCTAaGATATTAAGTACTGCTTATA<br>AAAC<br>TTAGGTTCAAATCTACACCGTATTTTACATTCACCATCTACTGATAAaaCTT<br>TGC | ribonucleotide reductase of class la<br>(aerobic) subunit beta [Francisella sp.<br>TX077308] >ref WP_013923022.1 <br>ribonucleoside diphosphate reductase<br>subunit beta [Francisella sp. TX077308]<br>>gb AEI36188.1  Ribonucleotide reductase<br>of class la (aerobic), beta subunit<br>[Francisella sp. TX077308] | 99.8 | 99.8 | 77% | 2,00E-23 | 98% | Francisella philomiragia subsp. philomiragia ATCC<br>25017, complete genome | 126  | 72% | 6,00E-26 | 84% |
| >contig166790 length=143 numreads=6<br>AGTTGTTGATAAAGTCAAGGTTAAAGTGAACAATGAGGTCCTTGGTAA<br>TCCTGC<br>AGCAGAGGTTGTAGCTATGAGAAGAAAGCGCATGTGATGTAATTGTGCTAG<br>GTTCTCA<br>TGCAACTCATGGTATAAATTTAC<br>>contig124775 length=180 numreads=6<br>TAATCAAAGGAGAGATATAAGTGAAGTATAAATCAGGGTTTAAAGGTTTGG<br>GTTACG<br>AGTTAAGGATATATGTTTTTATGTTGCTCTAaGATATTAAGTACTGCTTATA<br>AAAC<br>TTAGGTTCAAATCTACACCGTATTTTACATTCACCATCTACTGATAAaaCTT<br>TGC                                                                                                                                                                                                                                                                                                                                                                                                                                                                                                                                                                                                                      | 50S ribosomal protein L15 [Francisella<br>novicida U112]                                                                                                                                                                                                                                                              | 99.4 | 99.4 | 87% | 1,00E-24 | 81% | Francisella philomiragia subsp. philomiragia ATCC<br>25017, complete genome | 124  | 68% | 2,00E-25 | 84% |
| >contig174035 length=137 numreads=6<br>ATGAATTAATAAATACTAAAGAAAGATTATGAGCTAGAAAATATAGagCTgTATAT<br>GGTG<br>GTCACAAGATATTGAACAAGCTACTAAAATTTGGTTAGCAATTGCTTGGTCA<br>AAATT<br>ATGCTAAAGATTTACAA<br>>contig166790 length=143 numreads=6<br>AGTTGTTGATAAAGTCAAGGTTAAAGTGAACAATGAGGTCCTTGGTAA<br>TCCTGC<br>AGCAGAGGTTGTAGCTATGAGAAGAAAGCGCATGTGATGTAATTGTGCTAG<br>GTTCTCA<br>TGCAACTCATGGTATAAATTTAC<br>>contig124775 length=180 numreads=6<br>TAATCAAAGGAGAGATATAAGTGAAGTATAAATCAGGGTTTAAAGGTTTGG<br>GTTACG<br>AGTTAAGGATATATGTTTTTATGTTGCTCTAaGATATTAAGTACTGCTTATA<br>AAAC<br>TTAGGTTCAAATCTACACCGTATTTTACATTCACCATCTACTGATAAaaCTT<br>TGC                                                                                                                                                                                                                                                                                                                                                                                                                     | hypothetical protein [Francisella cf.<br>novicida Fx1] >ref WP_014549578.1 <br>cytochrome C oxidase subunit II<br>[Francisella novicida] >gb AEB27615.1 <br>Cytosol aminopeptidase PepA [Francisella<br>cf. novicida Fx1]                                                                                             | 72.8 | 72.8 | 83% | 2,00E-13 | 76% | Francisella philomiragia subsp. philomiragia ATCC<br>25017, complete genome | 89.8 | 45% | 7,00E-15 | 88% |
| >contig166790 length=143 numreads=6<br>AGTTGTTGATAAAGTCAAGGTTAAAGTGAACAATGAGGTCCTTGGTAA<br>TCCTGC<br>AGCAGAGGTTGTAGCTATGAGAAGAAAGCGCATGTGATGTAATTGTGCTAG<br>GTTCTCA<br>TGCAACTCATGGTATAAATTTAC<br>>contig124775 length=180 numreads=6<br>TAATCAAAGGAGAGATATAAGTGAAGTATAAATCAGGGTTTAAAGGTTTGG<br>GTTACG<br>AGTTAAGGATATATGTTTTTATGTTGCTCTAaGATATTAAGTACTGCTTATA<br>AAAC<br>TTAGGTTCAAATCTACACCGTATTTTACATTCACCATCTACTGATAAaaCTT<br>TGC                                                                                                                                                                                                                                                                                                                                                                                                                                                                                                                                                                                                                      | universal stress protein [Francisella<br>tularensis subsp. holarctica PHIT-F049]                                                                                                                                                                                                                                      | 51.6 | 51.6 | 59% | 3,00E-06 | 92% | Francisella philomiragia subsp. philomiragia ATCC<br>25017, complete genome | 86.1 | 66% | 1,00E-13 | 79% |
| >contig166790 length=143 numreads=6<br>AGTTGTTGATAAAGTCAAGGTTAAAGTGAACAATGAGGTCCTTGGTAA<br>TCCTGC<br>AGCAGAGGTTGTAGCTATGAGAAGAAAGCGCATGTGATGTAATTGTGCTAG<br>GTTCTCA<br>TGCAACTCATGGTATAAATTTAC<br>>contig124775 length=180 numreads=6<br>TAATCAAAGGAGAGATATAAGTGAAGTATAAATCAGGGTTTAAAGGTTTGG<br>GTTACG<br>AGTTAAGGATATATGTTTTTATGTTGCTCTAaGATATTAAGTACTGCTTATA<br>AAAC<br>TTAGGTTCAAATCTACACCGTATTTTACATTCACCATCTACTGATAAaaCTT<br>TGC                                                                                                                                                                                                                                                                                                                                                                                                                                                                                                                                                                                                                      | putrescine/spermidine ABC transporter<br>substrate-binding protein [Francisella<br>philomiragia] >gb EET21885.1  putrescine-<br>binding periplasmic protein [Francisella<br>philomiragia subsp. philomiragia ATCC<br>25015]                                                                                           | 49.3 | 49.3 | 32% | 5,00E-05 | 80% | Francisella philomiragia subsp. philomiragia ATCC<br>25017, complete genome | 75.0 | 30% | 3,00E-10 | 86% |

|                                                                                                                                                                                                                                                                                                                                                                                                                                                                                                                                                                                                                                                                                                                                                                                                                                                                                                                                                                                                                                                                                                                                                                                                                                                                                                                                                                                                                                                                                                                                                                                                                                                                                                                                          |                                                                                                                                                                                                                                                                                         |      |      |     |          |     |                                                                             |      |     |           |     |
|------------------------------------------------------------------------------------------------------------------------------------------------------------------------------------------------------------------------------------------------------------------------------------------------------------------------------------------------------------------------------------------------------------------------------------------------------------------------------------------------------------------------------------------------------------------------------------------------------------------------------------------------------------------------------------------------------------------------------------------------------------------------------------------------------------------------------------------------------------------------------------------------------------------------------------------------------------------------------------------------------------------------------------------------------------------------------------------------------------------------------------------------------------------------------------------------------------------------------------------------------------------------------------------------------------------------------------------------------------------------------------------------------------------------------------------------------------------------------------------------------------------------------------------------------------------------------------------------------------------------------------------------------------------------------------------------------------------------------------------|-----------------------------------------------------------------------------------------------------------------------------------------------------------------------------------------------------------------------------------------------------------------------------------------|------|------|-----|----------|-----|-----------------------------------------------------------------------------|------|-----|-----------|-----|
| <p>&gt;contig172525 length=138 numreads=11<br/> TTACTCTATAGTTACTAACTATAGCCTATATGGTCTCTCAAATCAATTCTAACCT<br/> TTT<br/> TATAAAAAATCAGTATTATCGTATCTGCTAAAAGCTTATTTCAAAGTCTATT<br/> CTGA<br/> GCAATATCCCGATCGTAT<br/> &gt;contig188530 length=121 numreads=7<br/> AAAGGAAATACGAAAAATAGAAATAAACTTTAACTGTTGTTCTCAAGTATTAA<br/> ACTTA<br/> GTGTTGTAGATAATATATTTTAGTGTAAATAAATaCGGGTCTGTAGCTCAGCTG<br/> GTTAG<br/> A<br/> &gt;contig69877 length=279 numreads=32<br/> TGTGGATCGGAGTGAAGGCTAATCAAGCAGGAGATAGCTGGTTCTCCCGGA<br/> AAACTAT<br/> TTAGGTAGTGCCTCGGTATAACTGATTGGGGTAAAGCACTGTTTCGACTAGGG<br/> GGGTTT<br/> TACGACCTTACCGACTCGATGCAAACTCAGAATACGATCAAGTCAATCACGGG<br/> AGACAC<br/> ACTGCGGGTCTAAGGTCGTAGTGAGAGGGAAACAGCCAGACCCCAACT<br/> AAGGTCC<br/> CAAAGTCATaGcTAAGTGGGAACGAaGTGGGAAGGCC</p>                                                                                                                                                                                                                                                                                                                                                                                                                                                                                                                                                                                                                                                                                                                                                                                                                                                                                                                                           | <p>cell division protein FtsW [Francisella<br/> novicida] &gt;gb EDX19776.1  cell division<br/> protein FtsW [Francisella tularensis subsp.<br/> novicida FTE]</p>                                                                                                                      | 55.8 | 55.8 | 54% | 1,00E-07 | 83% | Francisella philomiragia subsp. philomiragia ATCC<br>25017, complete genome | 71.3 | 35% | 2,00E-09  | 89% |
| <p>&gt;contig65400 length=293 numreads=26<br/> GCTATCTCCGGCTTGATTAGCCTTCACTCCGATCCaCACTCATCCcGTAATTT<br/> GCA<br/> ACATtAGTGGGTTCCGGTCTCCAGTTAGTATTACCTAACCTCAACCTGGTCATGG<br/> ATAG<br/> ATCGCGCCGGTTCCGGTCTACTCCTAGCAACTATACgCCCTATTAAGACTCGCTT<br/> TCGC<br/> TACGGATCCCTTATTCAAGTATCCTTGCTACTAAAAGTAACTCgCTGACCCATTAT<br/> ACAA<br/> AAGGTACGCACTCACATAACTAAATTTGCTCCTACTGCTTGTATGCAAGTGG<br/> &gt;contig42998 length=422 numreads=20<br/> AAAAGTTGGCAAGACcATTAGATAAACATCTAACTTTAGAAcAAGAAAAAGA<br/> TTTTCC<br/> AAATATCCCACTTATTGAATTAAGTAAATTTGCTGTaGcCCCTGAGAAAGATTTG<br/> ACAC<br/> TACAGTTTATCTTTCAAAGATACTCATGATAcATATCATCAGCTACTAGCACTT<br/> CTGG<br/> CTGGGGTTGGCGATATCCTGGTAGCCTGGAGATAGCCCTATAAATCGGAGCTGg<br/> CTCGTA<br/> TGCAGACTCTGTTATGGTGCCTGTGCTTACTACTACTGGTGGAGATGGCTaTtC<br/> GCTG<br/> TGGTACCCTCGCTCTGTGgTtHtATATATGAAAATGGGAATGCTGTAAGAAAG<br/> GCTGT<br/> ACTTGAAGCTGCTAAAGATTTACGCCATCTAAAAACTGGTTACTTATGATGAGCTA<br/> ACTAT<br/> TC<br/> &gt;contig90118 length=229 numreads=9<br/> CATCACACCcCAATAGTCTCAATACCTACAGATAGAGGAGTTACATCAAGAAGC<br/> AATAC<br/> ATCTTTAAcATCTCCTGTAATACACCACTTGAATAGCTGCACCAACTGCCACAG<br/> CTTC<br/> ATCAGGGTtHACATCTTtACCGGGCTCTTACCAAAAGAACTCTTTACTTTTCTTG<br/> TAC<br/> TAGAGGCATACGAGTTTGTCCACCTACTAAAAGCACTTCTGTAATATCA<br/> &gt;contig55868 length=334 numreads=22<br/> TCCTtAAGATTAGATATCCAGGTCTTAGACCTGTAAAGGAACGTTGGAGACTAC<br/> GACGT<br/> TGATAGGCTGGGTGTGAAGTACAGCAATGTATGAAGCTTACCACTACTAATGA<br/> TCCGAG<br/> AGACTTAAGTCTATTCTATGCTGAATTGTTAAATATCTTTATGATATGCAATTA<br/> AAC<br/> GTAAATACAAAACAAaCATTAGAGATTAAGTTTGGCGATGATAGCTGT<br/> AGGTAC<br/> CACCTGATCCcATTCCGAACCTCAGAAGTGAACCTATAACACGCgATGATAGTTT<br/> AGCAT<br/> TCGCTAAGTGAAGTAGGTAGTGCCTTTTATT</p> | <p>N(4)-(beta-N-acetylglucosaminy)-L-<br/> asparaginase [Francisella sp. TX077308]<br/> &gt;ref WP_013923506.1  asparaginase<br/> [Francisella sp. TX077308] &gt;gb AEI36677.1 <br/> N(4)-(Beta-N-acetylglucosaminy)-L-<br/> asparaginase precursor [Francisella sp.<br/> TX077308]</p> | 274  | 274  | 92% | 1,00E-89 | 93% | Francisella sp. TX077308, complete genome                                   | 1410 | 98% | 4,00E-129 | 96% |
| <p>&gt;contig90118 length=229 numreads=9<br/> CATCACACCcCAATAGTCTCAATACCTACAGATAGAGGAGTTACATCAAGAAGC<br/> AATAC<br/> ATCTTTAAcATCTCCTGTAATACACCACTTGAATAGCTGCACCAACTGCCACAG<br/> CTTC<br/> ATCAGGGTtHACATCTTtACCGGGCTCTTACCAAAAGAACTCTTTACTTTTCTTG<br/> TAC<br/> TAGAGGCATACGAGTTTGTCCACCTACTAAAAGCACTTCTGTAATATCA<br/> &gt;contig55868 length=334 numreads=22<br/> TCCTtAAGATTAGATATCCAGGTCTTAGACCTGTAAAGGAACGTTGGAGACTAC<br/> GACGT<br/> TGATAGGCTGGGTGTGAAGTACAGCAATGTATGAAGCTTACCACTACTAATGA<br/> TCCGAG<br/> AGACTTAAGTCTATTCTATGCTGAATTGTTAAATATCTTTATGATATGCAATTA<br/> AAC<br/> GTAAATACAAAACAAaCATTAGAGATTAAGTTTGGCGATGATAGCTGT<br/> AGGTAC<br/> CACCTGATCCcATTCCGAACCTCAGAAGTGAACCTATAACACGCgATGATAGTTT<br/> AGCAT<br/> TCGCTAAGTGAAGTAGGTAGTGCCTTTTATT</p>                                                                                                                                                                                                                                                                                                                                                                                                                                                                                                                                                                                                                                                                                                                                                                                                                                                                                                                                                                     | <p>molecular chaperone DnaK [Francisella sp.<br/> TX077308] &gt;ref WP_013922807.1 <br/> molecular chaperone DnaK [Francisella sp.<br/> TX077308] &gt;gb AEI35971.1  Chaperone<br/> protein DnaK [Francisella sp. TX077308]</p>                                                         | 117  | 117  | 90% | 8,00E-29 | 99% | Francisella sp. TX077308, complete genome                                   | 315  | 91% | 2,00E-82  | 91% |
| <p>&gt;contig90118 length=229 numreads=9<br/> CATCACACCcCAATAGTCTCAATACCTACAGATAGAGGAGTTACATCAAGAAGC<br/> AATAC<br/> ATCTTTAAcATCTCCTGTAATACACCACTTGAATAGCTGCACCAACTGCCACAG<br/> CTTC<br/> ATCAGGGTtHACATCTTtACCGGGCTCTTACCAAAAGAACTCTTTACTTTTCTTG<br/> TAC<br/> TAGAGGCATACGAGTTTGTCCACCTACTAAAAGCACTTCTGTAATATCA<br/> &gt;contig55868 length=334 numreads=22<br/> TCCTtAAGATTAGATATCCAGGTCTTAGACCTGTAAAGGAACGTTGGAGACTAC<br/> GACGT<br/> TGATAGGCTGGGTGTGAAGTACAGCAATGTATGAAGCTTACCACTACTAATGA<br/> TCCGAG<br/> AGACTTAAGTCTATTCTATGCTGAATTGTTAAATATCTTTATGATATGCAATTA<br/> AAC<br/> GTAAATACAAAACAAaCATTAGAGATTAAGTTTGGCGATGATAGCTGT<br/> AGGTAC<br/> CACCTGATCCcATTCCGAACCTCAGAAGTGAACCTATAACACGCgATGATAGTTT<br/> AGCAT<br/> TCGCTAAGTGAAGTAGGTAGTGCCTTTTATT</p>                                                                                                                                                                                                                                                                                                                                                                                                                                                                                                                                                                                                                                                                                                                                                                                                                                                                                                                                                                     | <p>Francisella sp. TX0773083-dehydroquinato<br/> synthase and 23S ribosomal RNA gene (by<br/> blastn)</p>                                                                                                                                                                               | 43.1 | 43.1 | 27% | 0.001    | 57% | Francisella sp. TX077308, complete genome                                   | 996  | 88% | 2,00E-78  | 84% |

|                                                                                                                                                                                                                                                                                                                                                                                                                                                                                                                                                                                                                                                                                                                                                                                                                                                                                                                                                                                                                                                                                                                                                         |                                                                                                                                                                                                                                                                         |      |      |     |          |      |                                                |     |     |          |     |
|---------------------------------------------------------------------------------------------------------------------------------------------------------------------------------------------------------------------------------------------------------------------------------------------------------------------------------------------------------------------------------------------------------------------------------------------------------------------------------------------------------------------------------------------------------------------------------------------------------------------------------------------------------------------------------------------------------------------------------------------------------------------------------------------------------------------------------------------------------------------------------------------------------------------------------------------------------------------------------------------------------------------------------------------------------------------------------------------------------------------------------------------------------|-------------------------------------------------------------------------------------------------------------------------------------------------------------------------------------------------------------------------------------------------------------------------|------|------|-----|----------|------|------------------------------------------------|-----|-----|----------|-----|
| >contig95299 length=221 numreads=8<br>CCTGCTAAGATAACAAGGAATACCTTTTCTTATCTCATAGCAGCATCAA<br>ATACA<br>TACTGTTGTGAACCACTAAAATGATACTAGTATACCCGCTTACACCGTCAA<br>GAAGT<br>AAGTTACGGATACGAATATTTGCAAATGTACCAGCATCATCTTCATGGTTAC<br>CACGA<br>CGAGAACCGTAAAGGTTAAAGCTTTTTCTACACCGTG<br>>contig171333 length=139 numreads=24<br>ATTCAGACAAGGTTTCTCGTCCCGCCCTACTTGTTCGTATgtCTAGTCCACTAA<br>GAT<br>TATTTGCTATACGGGACTATCACCTCTATCGTCAAGCTTCCCACTGTTCTACT<br>ATAA<br>TTCTAGCTATATCATACCA<br>>contig159845 length=149 numreads=6<br>AAATATCTAAGAGTGAAGCAAAAATTACTCAAGCTAAAAAGAGATGATTGAAG<br>CAAACT<br>TAAGATTGGTTGTTCTGAAGCTAAAAATATACAAACAGAGTTTACACTTCT<br>AGATA<br>TTATCCAAGAGGGTAATATTGGTCTAATG<br>>contig161267 length=148 numreads=7<br>TTAAATTAGATAATAATGGAAGTCCCGCTATTGAGAAGATTACTTAAAT<br>GGGTG<br>TTGGTGATGCTGCAAAAGACAAAAGTTAgtACTTTGTGTAATGATTGAC<br>TGCAA<br>TtGCTGGTCAAAAGCCAGTTGTTACTAA                                                                                                                                                                                                                                                               | Aconitate hydratase [Francisella sp.<br>TX077308] >ref WP_013922367.1 <br>aconitate hydratase [Francisella sp.<br>TX077308] >gb AEI35524.1  Aconitate<br>hydratase [Francisella sp. TX077308]                                                                           | 155  | 155  | 91% | 9,00E-42 | 97%  | Francisella sp. TX077308, complete genome      | 287 | 86% | 4,00E-74 | 91% |
| >contig195973 length=111 numreads=6<br>CATGGGTAATAGCACTACTGACTCTTGTACTCTGTAAGAATTTCTCAACCAT<br>GCTA<br>CAGATTACAGCTAAAGTGGTTAGTAGGCTCATCTAGTAGTATATCAG<br>>contig85008 length=240 numreads=11<br>GGAAAGCTTCTTTGTCATACCATATCAGTGAAGTAAACGATAAAGCACTT<br>GATAA<br>TTCCATGATACACCACCAAGTAAACACCTCTTTACCAAAAGATATCAGAGCGATA<br>TTCCA<br>TTTCCATAGTTTGGGAATACAAATGTGCGCCACAAGCTATAGCCAGCCTA<br>GAGCTT<br>GTTCAAGTTGTTTACCGTAAATATCTTGATAAACCACTACTACTATTGATACCA<br>GCAC<br>>contig64191 length=298 numreads=15<br>TACGAAGATCTGTATCGATATTTACTTTACGCACACCGTACTTAATAGCTTACG<br>ATTT<br>CACTTACAGGTACGCCGTAAGTTTCAACCATAGAAcCACCGTAATTATTGATAACT<br>TCTA<br>ACCAAGCTTGAAGTACAGATGAAGAACCATGCAATACaAGGTGAGTGTAGGGA<br>TTCTAG<br>CGTGAATCTCTTTACTCTGCTTATAGATAAAACATCACCTGTAGGTGGCTTAGT<br>GAACT<br>TATAAGCACCGTGAGAAGTACCTATAGCAATTGCTAAAGCATCAACCTTAGTTTT<br>CTT<br>>contig86933 length=236 numreads=14<br>TCATCATACCAGGAATAATAGTCAATACCTTCAGGTTTGAGTTAGTATCTA<br>CAacA<br>GACACTACTTAATACCTAATTTTTGAGCTTCTGAATAGcGATGTGCTCTTTATTA<br>CTA<br>TCAATAACAACGATTGCATCAGGAATACCCACCTTCTTAATACCAACGA<br>CTTTT<br>TCAAGCTTCTCGATGTTCTCATGTTTTGTAGCATTCTTTTTAGTTAAAGATTC | RNA polymerase sigma-70 factor<br>[Francisella noatunensis subsp. orientalis<br>str. Toba 04]                                                                                                                                                                           | 100  | 100  | 77% | 4,00E-23 | 98%  | Francisella cf. novicida 3523, complete genome | 182 | 74% | 1,00E-42 | 89% |
|                                                                                                                                                                                                                                                                                                                                                                                                                                                                                                                                                                                                                                                                                                                                                                                                                                                                                                                                                                                                                                                                                                                                                         | 50S ribosomal protein L5 [Francisella sp.<br>TX077308] >ref WP_013922028.1  50S<br>ribosomal protein L5 [Francisella sp.<br>TX077308] >gb AEI35172.1  LSU ribosomal<br>protein L5p [L11e] [Francisella sp.<br>TX077308]                                                 | 90.9 | 90.9 | 85% | 3,00E-21 | 94%  | Francisella sp. TX077308, complete genome      | 198 | 84% | 1,00E-47 | 92% |
|                                                                                                                                                                                                                                                                                                                                                                                                                                                                                                                                                                                                                                                                                                                                                                                                                                                                                                                                                                                                                                                                                                                                                         | ABC transporter ATP-binding family protein<br>[Francisella sp. TX077308]<br>>ref WP_013923710.1  heme ABC<br>transporter ATP-binding protein<br>[Francisella sp. TX077308] >gb AEI36885.1 <br>ABC transporter, ATP-binding family<br>protein [Francisella sp. TX077308] | 76.3 | 113  | 75% | 8,00E-15 | 100% | Francisella sp. TX077308, complete genome      | 163 | 78% | 3,00E-37 | 93% |
|                                                                                                                                                                                                                                                                                                                                                                                                                                                                                                                                                                                                                                                                                                                                                                                                                                                                                                                                                                                                                                                                                                                                                         | Ketol-acid reductoisomerase [Francisella<br>sp. TX077308] >ref WP_013923608.1  ketol-<br>acid reductoisomerase [Francisella sp.<br>TX077308] >gb AEI36780.1  Ketol-acid<br>reductoisomerase [Francisella sp.<br>TX077308]                                               | 164  | 164  | 90% | 3,00E-46 | 96%  | Francisella sp. TX077308, complete genome      | 364 | 90% | 2,00E-97 | 94% |
|                                                                                                                                                                                                                                                                                                                                                                                                                                                                                                                                                                                                                                                                                                                                                                                                                                                                                                                                                                                                                                                                                                                                                         | fructose-1,6-bisphosphate aldolase<br>[Francisella philomiragia subsp.<br>philomiragia ATCC 25017]                                                                                                                                                                      | 197  | 197  | 86% | 1,00E-59 | 95%  | Francisella sp. TX077308, complete genome      | 348 | 87% | 2,00E-92 | 88% |
|                                                                                                                                                                                                                                                                                                                                                                                                                                                                                                                                                                                                                                                                                                                                                                                                                                                                                                                                                                                                                                                                                                                                                         | RecName: Full=30S ribosomal protein<br>S2Francisella philomiragia subsp.<br>philomiragia ATCC 25017                                                                                                                                                                     | 153  | 153  | 87% | 3,00E-44 | 95%  | Francisella sp. TX077308, complete genome      | 292 | 84% | 9,00E-76 | 90% |



|                                                                                                                                                                                                                                                                                                                                                                                                                                                                                                                                                                                                                                                                                                                                                                                                                                                                                                                                                                                                                                                                                                                                                                                                                                                                                                                                                                                                                                                                                                                                                                                                                                                                                                                                                                                                                                                                                                                                                                                                                                                                                                                                                                                                                                                                                                                                                                                                                                                                                                                                                                                                                |                                                                                                                                                                                                                                                                                                                                                                                                                                                                                                                                                                                                                                                                                                                                                                                                                                                                                                                                                                                                                                                                                                                                                                                                                                                                                                                                                                                              |                                                                                         |                                                                                         |                                                                                         |                                                                                                                                 |                                                                                          |                                                                                                                                                                                                                                                                                                                                                                                                        |                                                                                         |                                                                                         |                                                                                                                                 |                                                                                         |
|----------------------------------------------------------------------------------------------------------------------------------------------------------------------------------------------------------------------------------------------------------------------------------------------------------------------------------------------------------------------------------------------------------------------------------------------------------------------------------------------------------------------------------------------------------------------------------------------------------------------------------------------------------------------------------------------------------------------------------------------------------------------------------------------------------------------------------------------------------------------------------------------------------------------------------------------------------------------------------------------------------------------------------------------------------------------------------------------------------------------------------------------------------------------------------------------------------------------------------------------------------------------------------------------------------------------------------------------------------------------------------------------------------------------------------------------------------------------------------------------------------------------------------------------------------------------------------------------------------------------------------------------------------------------------------------------------------------------------------------------------------------------------------------------------------------------------------------------------------------------------------------------------------------------------------------------------------------------------------------------------------------------------------------------------------------------------------------------------------------------------------------------------------------------------------------------------------------------------------------------------------------------------------------------------------------------------------------------------------------------------------------------------------------------------------------------------------------------------------------------------------------------------------------------------------------------------------------------------------------|----------------------------------------------------------------------------------------------------------------------------------------------------------------------------------------------------------------------------------------------------------------------------------------------------------------------------------------------------------------------------------------------------------------------------------------------------------------------------------------------------------------------------------------------------------------------------------------------------------------------------------------------------------------------------------------------------------------------------------------------------------------------------------------------------------------------------------------------------------------------------------------------------------------------------------------------------------------------------------------------------------------------------------------------------------------------------------------------------------------------------------------------------------------------------------------------------------------------------------------------------------------------------------------------------------------------------------------------------------------------------------------------|-----------------------------------------------------------------------------------------|-----------------------------------------------------------------------------------------|-----------------------------------------------------------------------------------------|---------------------------------------------------------------------------------------------------------------------------------|------------------------------------------------------------------------------------------|--------------------------------------------------------------------------------------------------------------------------------------------------------------------------------------------------------------------------------------------------------------------------------------------------------------------------------------------------------------------------------------------------------|-----------------------------------------------------------------------------------------|-----------------------------------------------------------------------------------------|---------------------------------------------------------------------------------------------------------------------------------|-----------------------------------------------------------------------------------------|
| <p>&gt;contig40455 length=449 numreads=28</p> <p>ATGCAAGAAGTCTCCATCTGTAAGAGCTTCTTTCTCGCTCCATCATCTTAG<br/>AAAC<br/>TGGAAATACCTGTAGCTTTTGAACCTACATCTGCAATCTCAATTTCTGTAACCTGACG<br/>TTCT<br/>AACTAGCTTATTTTCACTTAAATCAGAAGCTGTCTCTCTATCTGCTTAATCTGAG<br/>CTTC<br/>AAGCTCTGGAATTTACCGTATTGACAGTTCTGACATCTTTAATGACGCTGCTC<br/>TTTG<br/>ATACTTTTCAAGCTCAAACTAGCTTTCTCAAGTTTTTCTTCAGCTGCTGTGATACC<br/>TTG<br/>CATTTTTAGCTTCTCTGCTTTCAAATCTCCCTAAGCCCTGTACTCAGAATCCAG<br/>ACC<br/>TTTTATTTCAATCTCAAgTATCTCAAACGCTTCTCGTAGCATCATCTTTTCTTTT<br/>TT<br/>AAAGTTGCTCGCGCTGCATTTTTAGCTGGA<br/>&gt;contig55745 length=334 numreads=11<br/>CCTATAACACCTTTTCAaCTACTGTGTAATAGCATCACAGTGATCTGCACATA<br/>TAAC<br/>CAGTCACGGATATTTGAACCATCTCCATATACAGGAATAAGTTTTGATTAATAC<br/>AACTT<br/>TTGATAACTACAGGTATTAGCTTCTGCTGATGCTGATGACCATAGTTGTTG<br/>AACAG<br/>TTAGATATAGTTACAGGTAGCTTAAAGTATGTAATAGGCTTCTATATAGGT<br/>CAGAA<br/>CCTGCTTTACTAGCTGAGTATGGTGAATTTGGTTCATAAGCCTTATCTCTGTAAA<br/>TGCT<br/>GGATCATCTTTATCAAGAGTACCAAACTCAT<br/>&gt;contig97732 length=217 numreads=7<br/>ATTGATTAGTTTTAATTGTTGGTTTGGAGGCACGGTTAAGCCATTTTGTAT<br/>CTGC<br/>ATGACGATTACCGAGCATTTGAAATCAGCAGTCAGTACTAATgCACTACAACCA<br/>GCATG<br/>CTTGCATCTGCTATGAGATTTGCCATAAATTTCTATCTTTCATATACAGCTG<br/>GAA<br/>CCAAAATGGCTGGTTGTGTGTTTGGCACTCTCA<br/>&gt;contig93736 length=222 numreads=9<br/>CAGCTTactAaaGtttAGAGAATATCTTCTTACACATCCGCTTATTCCATTT<br/>AT<br/>TACAGAGAGTATTATCAGCAGTAAAAGCTCATCTGATaTGCTCAAACTTCA<br/>ATTAT<br/>GGATGTTAGCTACCTGAACTACTCAAGATTAGAAGCTCCAGAGGCTGAGAA<br/>AGCTAT<br/>CAGATGGTTACAGAACATCGTAACAACCTCTAGAAATATGCG</p> <p>&gt;contig13396 length=173 numreads=7<br/>TTATCGAGAGAAATACGACTATACCTACTAAGAAATCACAAGTATTCTACAGC<br/>TGAAG<br/>ATAATCAGCCTGAGTTACAATACATGTAATGCAAGGTGAGCGTAAATGGCGT<br/>CAGCAA<br/>ATAAATCTTTAGGTAGATTTGACTAGCTGATATCCACAGCACCTCGTGGT<br/>&gt;contig111355 length=197 numreads=8<br/>TTAATAGTAGCTAAGCCTGCTGCACAAGTACTGGGTGCCATATATGATGCTC<br/>CAAGC<br/>ACGAATGCTGATCTTGGAAATTTAGCCATGATTTATCAGATAACATACAGCAAC<br/>CTAGA<br/>GGTAAATATGATGATGTAATACCTTTTCCATCTTACGATATCAGGCACGATAT<br/>CATAA<br/>TTCATAAAACCAACCA<br/>&gt;contig141672 length=165 numreads=8<br/>TTCGTTTTGATTTTGGTGATGGTGAATGAGCTGTA AACATTCTTACGCTTT<br/>TAGC<br/>AGGTACGATAGTAAATAGCATGCTTATAAACCAATTTGGTTTACAGTATTTCTG<br/>AGTAC<br/>GATACAAAATTGATCAAAAGCTTCTACTTGACCTGTAGTTAAT</p> <p>&gt;contig129053 length=176 numreads=7<br/>CTGCTTTGGGATATCATATATGTA AACCATCACCAACTGAAATGCTAATAT<br/>CATAA<br/>GCTGCTTTTCTACTCATCATCTGCAACAGGAATCAAAATAGGCATAGTAGC<br/>TAAAG<br/>CTTGACCTGACCCACAGGTATAAAGAAGTTTTAAACGCTTTgggCTAGTGTCAATT</p> | <p>protein disaggregation chaperone<br/>[Francisella novicida] &gt;gb EDN38479.1 <br/>hypothetical protein FTDG_01296<br/>[Francisella novicida GA99-3548]</p> <p>dTDP-glucose 4,6-dehydratase [Francisella<br/>sp. TX077308] &gt;ref WP_013922615.1  dTDP-<br/>glucose 4,6-dehydratase [Francisella sp.<br/>TX077308] &gt;gb AEI35776.1  dTDP-glucose<br/>4,6-dehydratase [Francisella sp. TX077308]</p> <p>L-lactate dehydrogenase, partial<br/>[Francisella tularensis]</p> <p>valyl-tRNA synthetase [Francisella sp.<br/>TX077308] &gt;ref WP_013921990.1  valyl-<br/>tRNA synthetase [Francisella sp. TX077308]<br/>&gt;gb AEI35130.1  Valyl-tRNA synthetase<br/>[Francisella sp. TX077308]</p> <p>molecular chaperone DnaK [Francisella<br/>tularensis subsp. mediasiatica FSC147]</p> <p>adenosylmethionine-8-amino-7-<br/>oxononanoate aminotransferase<br/>[Francisella sp. TX077308]</p> <p>RNA-binding protein Hfq [Francisella sp.<br/>TX077308] &gt;ref WP_013923338.1  RNA-<br/>binding protein Hfq [Francisella sp.<br/>TX077308] &gt;gb AEI36506.1  RNA-binding<br/>protein Hfq [Francisella sp. TX077308]</p> <p>Arginine/ornithine antiporter ArcD<br/>[Francisella sp. TX077308]<br/>&gt;ref WP_013922004.1  C4-dicarboxylate<br/>ABC transporter [Francisella sp. TX077308]<br/>&gt;gb AEI35144.1  Arginine/ornithine<br/>antiporter ArcD [Francisella sp. TX077308]</p> | <p>214</p> <p>217</p> <p>151</p> <p>132</p> <p>122</p> <p>140</p> <p>114</p> <p>119</p> | <p>214</p> <p>217</p> <p>151</p> <p>132</p> <p>122</p> <p>140</p> <p>114</p> <p>119</p> | <p>93%</p> <p>93%</p> <p>87%</p> <p>89%</p> <p>87%</p> <p>82%</p> <p>89%</p> <p>85%</p> | <p>7,00E-62</p> <p>2,00E-67</p> <p>1,00E-42</p> <p>7,00E-34</p> <p>1,00E-30</p> <p>7,00E-38</p> <p>5,00E-31</p> <p>4,00E-30</p> | <p>91%</p> <p>94%</p> <p>97%</p> <p>88%</p> <p>97%</p> <p>97%</p> <p>96%</p> <p>100%</p> | <p>Francisella sp. TX077308, complete genome</p> <p>Francisella sp. TX077308 complete genome</p> | <p>287</p> <p>276</p> <p>248</p> <p>237</p> <p>226</p> <p>226</p> <p>213</p> <p>207</p> | <p>92%</p> <p>93%</p> <p>85%</p> <p>88%</p> <p>86%</p> <p>83%</p> <p>86%</p> <p>92%</p> | <p>8,00E-74</p> <p>1,00E-70</p> <p>2,00E-62</p> <p>4,00E-59</p> <p>6,00E-56</p> <p>8,00E-56</p> <p>4,00E-52</p> <p>2,00E-50</p> | <p>78%</p> <p>82%</p> <p>88%</p> <p>86%</p> <p>90%</p> <p>87%</p> <p>91%</p> <p>88%</p> |
|----------------------------------------------------------------------------------------------------------------------------------------------------------------------------------------------------------------------------------------------------------------------------------------------------------------------------------------------------------------------------------------------------------------------------------------------------------------------------------------------------------------------------------------------------------------------------------------------------------------------------------------------------------------------------------------------------------------------------------------------------------------------------------------------------------------------------------------------------------------------------------------------------------------------------------------------------------------------------------------------------------------------------------------------------------------------------------------------------------------------------------------------------------------------------------------------------------------------------------------------------------------------------------------------------------------------------------------------------------------------------------------------------------------------------------------------------------------------------------------------------------------------------------------------------------------------------------------------------------------------------------------------------------------------------------------------------------------------------------------------------------------------------------------------------------------------------------------------------------------------------------------------------------------------------------------------------------------------------------------------------------------------------------------------------------------------------------------------------------------------------------------------------------------------------------------------------------------------------------------------------------------------------------------------------------------------------------------------------------------------------------------------------------------------------------------------------------------------------------------------------------------------------------------------------------------------------------------------------------------|----------------------------------------------------------------------------------------------------------------------------------------------------------------------------------------------------------------------------------------------------------------------------------------------------------------------------------------------------------------------------------------------------------------------------------------------------------------------------------------------------------------------------------------------------------------------------------------------------------------------------------------------------------------------------------------------------------------------------------------------------------------------------------------------------------------------------------------------------------------------------------------------------------------------------------------------------------------------------------------------------------------------------------------------------------------------------------------------------------------------------------------------------------------------------------------------------------------------------------------------------------------------------------------------------------------------------------------------------------------------------------------------|-----------------------------------------------------------------------------------------|-----------------------------------------------------------------------------------------|-----------------------------------------------------------------------------------------|---------------------------------------------------------------------------------------------------------------------------------|------------------------------------------------------------------------------------------|--------------------------------------------------------------------------------------------------------------------------------------------------------------------------------------------------------------------------------------------------------------------------------------------------------------------------------------------------------------------------------------------------------|-----------------------------------------------------------------------------------------|-----------------------------------------------------------------------------------------|---------------------------------------------------------------------------------------------------------------------------------|-----------------------------------------------------------------------------------------|

|                                                                                                                                                                                                                                                                                                                                                                                                                                                                                                                                                                                                                                                                                                                                                                                                                                                                                                                                                                                                                                                                                                                                                                                                                                                                                                                                                                                                                                                                                                                                                                                                                                                                                                                                                                                                                                                                                                                                                                                                                        |                                                                                                                                                                                                                                                                                                                                                                                                                                                                                                                                                                                                                                                                                                                                                                                                                                                                                                                                                                                                                                                                        |                                                               |                                                        |                                                      |                                                                                              |                                                      |                                                                                                                                                                                                                                                                                                                                                |                                                      |                                                      |                                                                                              |                                                      |
|------------------------------------------------------------------------------------------------------------------------------------------------------------------------------------------------------------------------------------------------------------------------------------------------------------------------------------------------------------------------------------------------------------------------------------------------------------------------------------------------------------------------------------------------------------------------------------------------------------------------------------------------------------------------------------------------------------------------------------------------------------------------------------------------------------------------------------------------------------------------------------------------------------------------------------------------------------------------------------------------------------------------------------------------------------------------------------------------------------------------------------------------------------------------------------------------------------------------------------------------------------------------------------------------------------------------------------------------------------------------------------------------------------------------------------------------------------------------------------------------------------------------------------------------------------------------------------------------------------------------------------------------------------------------------------------------------------------------------------------------------------------------------------------------------------------------------------------------------------------------------------------------------------------------------------------------------------------------------------------------------------------------|------------------------------------------------------------------------------------------------------------------------------------------------------------------------------------------------------------------------------------------------------------------------------------------------------------------------------------------------------------------------------------------------------------------------------------------------------------------------------------------------------------------------------------------------------------------------------------------------------------------------------------------------------------------------------------------------------------------------------------------------------------------------------------------------------------------------------------------------------------------------------------------------------------------------------------------------------------------------------------------------------------------------------------------------------------------------|---------------------------------------------------------------|--------------------------------------------------------|------------------------------------------------------|----------------------------------------------------------------------------------------------|------------------------------------------------------|------------------------------------------------------------------------------------------------------------------------------------------------------------------------------------------------------------------------------------------------------------------------------------------------------------------------------------------------|------------------------------------------------------|------------------------------------------------------|----------------------------------------------------------------------------------------------|------------------------------------------------------|
| >contig102038 length=210 numreads=11<br>CTGTAATTTGCTAGACGAAGTTGAgAAAGCTCAGCAGATGATTTAACATACT<br>TCTAC<br>AAGTATTAGATGATGGTCTGCTTACAGATGGACAGGACGTACAGTGGATTTA<br>AAAAACA<br>CTGTAATGTTATGACTTCAAACCTGGTTCGCAATAAGATTCAAGAAATGCAGGG<br>TGATG<br>ACTATGAACTGTAAAATCTGCTGTGATGG<br>>contig119829 length=186 numreads=8<br>TTAAATTCATTATCAACTACATAAGGATTTCCGACAGTAAATCTAAACAGAGC<br>AGCA<br>TTACCTTCAACATGCATGATTATCAGGAATAGACATTCACCAACTTACCCAT<br>ACCT<br>TTCAITTTGCCGAAACGTTGGAAGTTAAGAAGCATGGCAAAATGATGCAATAAT<br>GCAACA<br>CCTTCA<br>>contig139909 length=167 numreads=7<br>ACCAACAACATTCCCTAAAGCATGATAGTGGTTCTAAaCctGCTTCTTGATCCA<br>ACT<br>ATCGATAACAGGAATAATTTGCTGTCTTTGCTCAAAAACAGGcGAGTAACTC<br>CCCT<br>TTCTGATGAGCTAAAAGTCGAGCTGATCAAAGTACTTTTTAACT<br>>contig164444 length=145 numreads=7<br>ATTATTAGTCAATAATCATTATGATCATTAGATTCAAAGTTATAAAaGATTTCC<br>AAAT<br>AAAGGAAGATACAAAGTAATAGTACCTCTGGGCTTAGTAGCTTTTTATCAAAA<br>GAGGG<br>TTTAGTAATGTAAGTAAATGAACT<br>>contig182212 length=129 numreads=7<br>TTATTCAAGTCAACAGAAGATTAGTTGGTGTGGTGGAGAATAAATGTATCTC<br>CTAAT<br>GCTGTTAATGTGATCTCTGATCATGATGGATAGCAGTAAATCACTGCTCCAC<br>ATAGT<br>CACCTAAGA<br>>contig92296 length=226 numreads=10<br>CAAAAGCTGGAGATTAGATTATTTTTATTGCTGGAGAAAAGATAGCAGAAG<br>TAACAG<br>AAACATTCAGCGGAATAACAGGTAAAGCAATCTCCACCATATTGGAGTTGTA<br>TTATT<br>CTGGTTCAACATGACTTACTGATTTACCTGATGCTCAGCATCAAAATGCAAA<br>TTTCA<br>TAAATGATTGTCAGCAGTATAATCCAATGGGATCATTTCAGCT<br>>contig103984 length=207 numreads=10<br>TTTAATCGTTCTTCAAAGTCACCTCTAAaTTTTTGCACTGCTAGcaGTGCCCCATA<br>TCT<br>AAGGATAGTACTTTTTCCCTTtCCcTtCAGGAACTTCACTTTGATTATCCTTT<br>GA<br>GCTAAGCCCTTACTATAGCTGTTTACCTACCCCTGGCTCACCATTAGTACAG<br>GATTA<br>TTCTTAGTACGCTGTAATACTGT<br>>contig90764 length=229 numreads=9<br>TAACAACACTTACGCCAGCCCTAGCTTTACCAAATTTGATTTTTCAcCtTCAACA<br>AGTA<br>TCACAACCTGAACCACTATACTACCCACTATAGCGATACCTGAGTATTCTAAA<br>AGCAA<br>CTAAAATCAGTGGTCAAATATACCAATGGTTCATAGATGGTAAAGGTGCCA<br>TACCTA<br>CGGTAGGAACCCCCATAAAGAATGCGGCTAAGCTAGAGCAGTTGTTCT | protein disaggregation chaperone<br>[Francisella novicida] >gb EDN38479.1 <br>hypothetical protein FTDG_01296<br>[Francisella novicida GA99-3548]<br><br>bifunctional gluaredoxin/ribonucleoside-<br>diphosphate reductase subunit beta<br>[Francisella tularensis subsp. holarctica<br>LVS]<br><br>N-carbamoyl-L-amino acid hydrolase<br>[Francisella sp. TX077308]<br><br>outer membrane protein romA [Francisella<br>sp. TX077308]<br><br>N-carbamoyl-L-amino acid hydrolase<br>[Francisella sp. TX077308]<br><br>Alpha-glucosidase [Francisella cf. novicida<br>3523] >ref WP_014548203.1  alpha-<br>glucosidase [Francisella novicida]<br>>gb AEE26202.1  Alpha-glucosidase<br>[Francisella cf. novicida 3523]<br><br>protein disaggregation chaperone<br>[Francisella philomiragia] >gb EET20631.1 <br>chaperone clpB [Francisella philomiragia<br>subsp. philomiragia ATCC 25015]<br><br>major facilitator transporter [Francisella<br>philomiragia] >gb EET20522.1 <br>metabolite:H+ symporter [Francisella<br>philomiragia subsp. philomiragia ATCC<br>25015] | 140<br>140<br>130<br>114<br>92.4<br>88.6<br>141<br>137<br>133 | 140<br>130<br>114<br>92.4<br>88.6<br>141<br>137<br>133 | 87%<br>72%<br>84%<br>85%<br>82%<br>90%<br>86%<br>88% | 2,00E-36<br>3,00E-34<br>7,00E-29<br>3,00E-21<br>2,00E-19<br>4,00E-37<br>1,00E-35<br>3,00E-35 | 96%<br>97%<br>95%<br>92%<br>98%<br>88%<br>97%<br>88% | Francisella sp. TX077308, complete genome<br><br>Francisella sp. TX077308, complete genom | 207<br>206<br>196<br>193<br>187<br>185<br>178<br>172 | 87%<br>72%<br>85%<br>86%<br>75%<br>91%<br>87%<br>83% | 3,00E-50<br>1,00E-49<br>5,00E-47<br>5,00E-46<br>2,00E-44<br>1,00E-43<br>2,00E-41<br>1,00E-39 | 85%<br>87%<br>88%<br>90%<br>95%<br>81%<br>82%<br>81% |
| <b>Contigs</b>                                                                                                                                                                                                                                                                                                                                                                                                                                                                                                                                                                                                                                                                                                                                                                                                                                                                                                                                                                                                                                                                                                                                                                                                                                                                                                                                                                                                                                                                                                                                                                                                                                                                                                                                                                                                                                                                                                                                                                                                         | <b>Blastx</b>                                                                                                                                                                                                                                                                                                                                                                                                                                                                                                                                                                                                                                                                                                                                                                                                                                                                                                                                                                                                                                                          | <b>Max score</b>                                              | <b>Score</b>                                           | <b>Query Cover</b>                                   | <b>e-value</b>                                                                               | <b>Identity</b>                                      | <b>Blastn</b>                                                                                                                                                                                                                                                                                                                                  | <b>Score</b>                                         | <b>Query Cover</b>                                   | <b>e-value</b>                                                                               | <b>Identity</b>                                      |
| >contig152012 length=156 numreads=7<br>GGTATTTCTGTGGTGTATAATGGCGAGCCAGTACTAGATCTTGACTATGATG<br>AAGAC<br>TCAAATGCTGAGACAGATATGAATGATGAATGAATCTGAAGGTGGTATGATT<br>GAGATT<br>CAAGGTACAGCAGAAGTAAAGCTTTTCAGAAGAA<br>>contig198083 length=107 numreads=6<br>CTGTAAGTGGTGAATGTTCCGTAAGCTTCTGATCGTGGAGAAGCTGGIGA<br>TAACG<br>TTGGGTaCTAGTTCGTGGTCTTAAGAGAGATGATGTTGAGCGTGGT                                                                                                                                                                                                                                                                                                                                                                                                                                                                                                                                                                                                                                                                                                                                                                                                                                                                                                                                                                                                                                                                                                                                                                                                                                                                                                                                                                                                                                                                                                                                                                                                                                                   | ribonuclease PH [Francisella philomiragia]<br>>gb EET20213.1  ribonuclease PH<br>[Francisella philomiragia subsp.<br>philomiragia ATCC 25015]<br><br>translation elongation factor Tu<br>[Francisella sp. TX077308]                                                                                                                                                                                                                                                                                                                                                                                                                                                                                                                                                                                                                                                                                                                                                                                                                                                    | 102<br>71.2                                                   | 102<br>71.2                                            | 88%<br>80%                                           | 6,00E-25<br>2,00E-13                                                                         | 94%<br>94%                                           | Francisella sp. TX077308, complete genome<br><br>Francisella sp. TX077308, complete genome                                                                                                                                                                                                                                                     | 167<br>150                                           | 85%<br>78%                                           | 3,00E-38<br>2,00E-33                                                                         | 87%<br>92%                                           |

|                                                                                                                                                                                                                                                                                                                                                                                                                                                                                                                                                                                                                                                                                                                                                                                                                                                                                                                                                                                                                                                                                                                                                                         |                                                                                                                                                                                                                                                  |      |      |     |          |     |                                                                                     |      |     |          |     |
|-------------------------------------------------------------------------------------------------------------------------------------------------------------------------------------------------------------------------------------------------------------------------------------------------------------------------------------------------------------------------------------------------------------------------------------------------------------------------------------------------------------------------------------------------------------------------------------------------------------------------------------------------------------------------------------------------------------------------------------------------------------------------------------------------------------------------------------------------------------------------------------------------------------------------------------------------------------------------------------------------------------------------------------------------------------------------------------------------------------------------------------------------------------------------|--------------------------------------------------------------------------------------------------------------------------------------------------------------------------------------------------------------------------------------------------|------|------|-----|----------|-----|-------------------------------------------------------------------------------------|------|-----|----------|-----|
| >contig163781 length=146 numreads=6<br>AATTAATACTCTGACGTAAACGCTAGCTTATGTAAACCCCTAAAGAGGAAACAAA<br>TATTT<br>GGTTTGATGCTTATGATTCCAAAGGTGCCAAAGATGTTGATAGTGCCTATGA<br>GCTTA<br>TGAACATATCATAGATCCTTATGTA<br>>contig145874 length=161 numreads=6<br>ATAGTTAATCCTCAAAAACCAATAAACAACAAAGTATAGATGGAAAAATAAACAA<br>TTCCA<br>ACCAAGTTGCCATTAAGACAACCTGAGAACCAAGATTGCTaccTGCAAGTA<br>AAGCC<br>CCACCAATATTATGAGACATATCCACAAACCTAAGAAGAA<br>>contig81334 length=248 numreads=8<br>GAGAAAAAGGGAACGCATAATACCTAaTGAAAAAATCTTTCTCAAGGATAT<br>ATAAGA<br>GTACGCATAAATGGCGAGTTTTATAACCTTGATGAGAGCACCCAGAATTAGAT<br>CGCTAT<br>AAGAAACATAATAGATAGTAGTGTGCATCGCTTAAACCTAAAAAGATAAT<br>GACCCAG<br>CGTATAGCTGAATCTATAGAAACGGCTTATAGACTGGGTAATGTTATTAAAG<br>TTGCA<br>AATATGAA                                                                                                                                                                                                                                                                                                                                                                                                                    | putrescine ABC transporter putrescine-binding protein PotF [Francisella sp. TX077308]                                                                                                                                                            | 92.0 | 92.0 | 75% | 1,00E-20 | 91% | Francisella sp. TX077308, complete genome                                           | 150  | 75% | 4,00E-33 | 86% |
| >contig130219 length=176 numreads=7<br>CTCTTTGCTTTGTGCAAAATTTATAAACCTAACTTTCTCATGCTCAAAATCAAATTC<br>ATC<br>ATCAGTAAACCAACTCTTTTTTAGTTAGTTCAGCAGGTAAGAGTGAAGAGTAGA<br>TCTCT<br>TGCTAATCCATAGCTCGTAAGCCAACATCTTTTTGCTTATTATAAACCATAT<br>>contig126294 length=180 numreads=10<br>CTATGATAAGTGCaaTGGCAGTTTTAAATGGCTTTGTTGGTATAAAATcATTCATA<br>AGCT<br>TTGGCCACTATATTTGATGAGTTACTGTGATGCActCAGTGGTGTAGCTAGTAT<br>TATG<br>GGACTGCAATGACATTAGTCAACCTATTGCTACTGTTATAGGATTACTTTAGTT<br>GATG                                                                                                                                                                                                                                                                                                                                                                                                                                                                                                                                                                                                                                                                                      | excinuclease ABC subunit A [Francisella cf. novicida 3523] >ref WP_014547926.1 <br>excinuclease ABC subunit A [Francisella novicida] >gb AEB28472.1 <br>excinuclease ABC subunit A [Francisella cf. novicida 3523]                               | 90.9 | 90.9 | 78% | 8,00E-20 | 78% | Francisella sp. TX077308, complete genome                                           | 143  | 75% | 7,00E-31 | 83% |
| >contig165644 length=144 numreads=6<br>AAAAGTACCTCACGCCCTTTGGGTAGTAAAGCCTCATCTATCTGCAATAAAA<br>TTATA<br>GATATTCGAAGGAGTAAATAGCATCGCTCGTCAAACTCAAAAACAAAC<br>TATCAA<br>CACAAATGCAACAAAGCAACTAC<br>>contig55685 length=334 numreads=15<br>AAACCTGAGCCTCGTATTGCTTGAAGTAAAGAGTTTCAGCTTGGTCATCTGGT<br>GATGT<br>CCTAACGATAAATAGGAGCAGGGTAGTTAGCCATTTGTTCAAAAAAGCT<br>ATTCGT<br>TGCTGCTTCCCAAGCTTCAAACTTTCTCCTTAGTACTTTTCAAGTTTATGT<br>GTA<br>ATAAATGCGATATTGTTATCATCAAAATATTGTTACAATACTGTTGCCAATATT<br>AGCA<br>TCAGAGTGAATAGCATGGTTTATATATAGTATgATGGAAATTTAATTTCTTT<br>GAAA<br>ATATCAACTAATACGCTAGAGTCAATGCCACCAC<br>>contig149397 length=158 numreads=10<br>CAAAGATTCTTCTTAAATCACCGTCAGTAAATATACCTAGTAGCTCATTGTTTCA<br>GTAA<br>TAAGAGTATTACCTATACCTTACTACTAATTTGCGATTTGCTTACGAATAGTG<br>TCTG<br>TTGGTTTATAGTGGGATTTCATTTCTCTACGCATA<br>>contig74482 length=266 numreads=14<br>cccccttgcctCCTaCTATGTCGAGTAGGTAACCAGACTGCTCGTTGGGTTCC<br>C<br>CCCATTCGAAATCTCCGGATCATAGGTCATTTACCACCTAACGAgAAGCTTATCGC<br>AGAT<br>TAACACGTCCTTCTCGCTCTGAATGCCAAGGCACTCCGCCACTTGCACTTATTTT<br>CTTA<br>AGTCTATCTTACTAAATGTTAAATATCTCTATCTCATGCAAAATAATATTG<br>GTGG<br>AGCCTAGCGGGATGAAACCGCTGACC | Cyanophycin synthase [Francisella cf. novicida 3523] >ref WP_014548065.1 <br>cyanophycin synthetase [Francisella novicida] >gb AEB28614.1 <br>Cyanophycin synthase [Francisella cf. novicida 3523]                                               | 73.9 | 73.9 | 85% | 2,00E-13 | 86% | Francisella sp. TX077308, complete genome                                           | 119  | 84% | 1,00E-23 | 79% |
| >contig165644 length=144 numreads=6<br>AAAAGTACCTCACGCCCTTTGGGTAGTAAAGCCTCATCTATCTGCAATAAAA<br>TTATA<br>GATATTCGAAGGAGTAAATAGCATCGCTCGTCAAACTCAAAAACAAAC<br>TATCAA<br>CACAAATGCAACAAAGCAACTAC<br>>contig55685 length=334 numreads=15<br>AAACCTGAGCCTCGTATTGCTTGAAGTAAAGAGTTTCAGCTTGGTCATCTGGT<br>GATGT<br>CCTAACGATAAATAGGAGCAGGGTAGTTAGCCATTTGTTCAAAAAAGCT<br>ATTCGT<br>TGCTGCTTCCCAAGCTTCAAACTTTCTCCTTAGTACTTTTCAAGTTTATGT<br>GTA<br>ATAAATGCGATATTGTTATCATCAAAATATTGTTACAATACTGTTGCCAATATT<br>AGCA<br>TCAGAGTGAATAGCATGGTTTATATATAGTATgATGGAAATTTAATTTCTTT<br>GAAA<br>ATATCAACTAATACGCTAGAGTCAATGCCACCAC<br>>contig149397 length=158 numreads=10<br>CAAAGATTCTTCTTAAATCACCGTCAGTAAATATACCTAGTAGCTCATTGTTTCA<br>GTAA<br>TAAGAGTATTACCTATACCTTACTACTAATTTGCGATTTGCTTACGAATAGTG<br>TCTG<br>TTGGTTTATAGTGGGATTTCATTTCTCTACGCATA<br>>contig74482 length=266 numreads=14<br>cccccttgcctCCTaCTATGTCGAGTAGGTAACCAGACTGCTCGTTGGGTTCC<br>C<br>CCCATTCGAAATCTCCGGATCATAGGTCATTTACCACCTAACGAgAAGCTTATCGC<br>AGAT<br>TAACACGTCCTTCTCGCTCTGAATGCCAAGGCACTCCGCCACTTGCACTTATTTT<br>CTTA<br>AGTCTATCTTACTAAATGTTAAATATCTCTATCTCATGCAAAATAATATTG<br>GTGG<br>AGCCTAGCGGGATGAAACCGCTGACC | Arabinose-proton symporter [Francisella cf. novicida 3523] >ref WP_014548791.1 <br>MFS transporter [Francisella novicida] >gb AEE26810.1 <br>Arabinose-proton symporter [Francisella cf. novicida 3523]                                          | 94.4 | 94.4 | 85% | 3,00E-21 | 76% | Francisella sp. TX077308, complete genome                                           | 108  | 74% | 2,00E-20 | 79% |
| >contig165644 length=144 numreads=6<br>AAAAGTACCTCACGCCCTTTGGGTAGTAAAGCCTCATCTATCTGCAATAAAA<br>TTATA<br>GATATTCGAAGGAGTAAATAGCATCGCTCGTCAAACTCAAAAACAAAC<br>TATCAA<br>CACAAATGCAACAAAGCAACTAC<br>>contig55685 length=334 numreads=15<br>AAACCTGAGCCTCGTATTGCTTGAAGTAAAGAGTTTCAGCTTGGTCATCTGGT<br>GATGT<br>CCTAACGATAAATAGGAGCAGGGTAGTTAGCCATTTGTTCAAAAAAGCT<br>ATTCGT<br>TGCTGCTTCCCAAGCTTCAAACTTTCTCCTTAGTACTTTTCAAGTTTATGT<br>GTA<br>ATAAATGCGATATTGTTATCATCAAAATATTGTTACAATACTGTTGCCAATATT<br>AGCA<br>TCAGAGTGAATAGCATGGTTTATATATAGTATgATGGAAATTTAATTTCTTT<br>GAAA<br>ATATCAACTAATACGCTAGAGTCAATGCCACCAC<br>>contig149397 length=158 numreads=10<br>CAAAGATTCTTCTTAAATCACCGTCAGTAAATATACCTAGTAGCTCATTGTTTCA<br>GTAA<br>TAAGAGTATTACCTATACCTTACTACTAATTTGCGATTTGCTTACGAATAGTG<br>TCTG<br>TTGGTTTATAGTGGGATTTCATTTCTCTACGCATA<br>>contig74482 length=266 numreads=14<br>cccccttgcctCCTaCTATGTCGAGTAGGTAACCAGACTGCTCGTTGGGTTCC<br>C<br>CCCATTCGAAATCTCCGGATCATAGGTCATTTACCACCTAACGAgAAGCTTATCGC<br>AGAT<br>TAACACGTCCTTCTCGCTCTGAATGCCAAGGCACTCCGCCACTTGCACTTATTTT<br>CTTA<br>AGTCTATCTTACTAAATGTTAAATATCTCTATCTCATGCAAAATAATATTG<br>GTGG<br>AGCCTAGCGGGATGAAACCGCTGACC | Rhamnogalacturonide transporter RhiT [Francisella cf. novicida 3523] >ref WP_014548204.1 <br>Rhamnogalacturonide transporter RhiT [Francisella novicida] >gb AEE26203.1 <br>Rhamnogalacturonide transporter RhiT [Francisella cf. novicida 3523] | 70.1 | 70.1 | 52% | 2,00E-12 | 97% | Francisella sp. TX077308, complete genome                                           | 106  | 62% | 7,00E-20 | 84% |
| >contig165644 length=144 numreads=6<br>AAAAGTACCTCACGCCCTTTGGGTAGTAAAGCCTCATCTATCTGCAATAAAA<br>TTATA<br>GATATTCGAAGGAGTAAATAGCATCGCTCGTCAAACTCAAAAACAAAC<br>TATCAA<br>CACAAATGCAACAAAGCAACTAC<br>>contig55685 length=334 numreads=15<br>AAACCTGAGCCTCGTATTGCTTGAAGTAAAGAGTTTCAGCTTGGTCATCTGGT<br>GATGT<br>CCTAACGATAAATAGGAGCAGGGTAGTTAGCCATTTGTTCAAAAAAGCT<br>ATTCGT<br>TGCTGCTTCCCAAGCTTCAAACTTTCTCCTTAGTACTTTTCAAGTTTATGT<br>GTA<br>ATAAATGCGATATTGTTATCATCAAAATATTGTTACAATACTGTTGCCAATATT<br>AGCA<br>TCAGAGTGAATAGCATGGTTTATATATAGTATgATGGAAATTTAATTTCTTT<br>GAAA<br>ATATCAACTAATACGCTAGAGTCAATGCCACCAC<br>>contig149397 length=158 numreads=10<br>CAAAGATTCTTCTTAAATCACCGTCAGTAAATATACCTAGTAGCTCATTGTTTCA<br>GTAA<br>TAAGAGTATTACCTATACCTTACTACTAATTTGCGATTTGCTTACGAATAGTG<br>TCTG<br>TTGGTTTATAGTGGGATTTCATTTCTCTACGCATA<br>>contig74482 length=266 numreads=14<br>cccccttgcctCCTaCTATGTCGAGTAGGTAACCAGACTGCTCGTTGGGTTCC<br>C<br>CCCATTCGAAATCTCCGGATCATAGGTCATTTACCACCTAACGAgAAGCTTATCGC<br>AGAT<br>TAACACGTCCTTCTCGCTCTGAATGCCAAGGCACTCCGCCACTTGCACTTATTTT<br>CTTA<br>AGTCTATCTTACTAAATGTTAAATATCTCTATCTCATGCAAAATAATATTG<br>GTGG<br>AGCCTAGCGGGATGAAACCGCTGACC | tRNA(Ile)-lysine synthetase [Francisella cf. novicida 3523] >ref WP_014548610.1 <br>tRNA(Ile)-lysine synthetase [Francisella novicida] >gb AEE26621.1 <br>tRNA(Ile)-lysine synthetase [Francisella cf. novicida 3523]                            | 134  | 134  | 91% | 5,00E-35 | 68% | Francisella sp. TX077308, complete genome                                           | 93.5 | 41% | 1,00E-15 | 78% |
| >contig165644 length=144 numreads=6<br>AAAAGTACCTCACGCCCTTTGGGTAGTAAAGCCTCATCTATCTGCAATAAAA<br>TTATA<br>GATATTCGAAGGAGTAAATAGCATCGCTCGTCAAACTCAAAAACAAAC<br>TATCAA<br>CACAAATGCAACAAAGCAACTAC<br>>contig55685 length=334 numreads=15<br>AAACCTGAGCCTCGTATTGCTTGAAGTAAAGAGTTTCAGCTTGGTCATCTGGT<br>GATGT<br>CCTAACGATAAATAGGAGCAGGGTAGTTAGCCATTTGTTCAAAAAAGCT<br>ATTCGT<br>TGCTGCTTCCCAAGCTTCAAACTTTCTCCTTAGTACTTTTCAAGTTTATGT<br>GTA<br>ATAAATGCGATATTGTTATCATCAAAATATTGTTACAATACTGTTGCCAATATT<br>AGCA<br>TCAGAGTGAATAGCATGGTTTATATATAGTATgATGGAAATTTAATTTCTTT<br>GAAA<br>ATATCAACTAATACGCTAGAGTCAATGCCACCAC<br>>contig149397 length=158 numreads=10<br>CAAAGATTCTTCTTAAATCACCGTCAGTAAATATACCTAGTAGCTCATTGTTTCA<br>GTAA<br>TAAGAGTATTACCTATACCTTACTACTAATTTGCGATTTGCTTACGAATAGTG<br>TCTG<br>TTGGTTTATAGTGGGATTTCATTTCTCTACGCATA<br>>contig74482 length=266 numreads=14<br>cccccttgcctCCTaCTATGTCGAGTAGGTAACCAGACTGCTCGTTGGGTTCC<br>C<br>CCCATTCGAAATCTCCGGATCATAGGTCATTTACCACCTAACGAgAAGCTTATCGC<br>AGAT<br>TAACACGTCCTTCTCGCTCTGAATGCCAAGGCACTCCGCCACTTGCACTTATTTT<br>CTTA<br>AGTCTATCTTACTAAATGTTAAATATCTCTATCTCATGCAAAATAATATTG<br>GTGG<br>AGCCTAGCGGGATGAAACCGCTGACC | arabinose phosphate isomerase [Francisella tularensis subsp. tularensis SCHU S4]                                                                                                                                                                 | 87.8 | 87.8 | 81% | 2,00E-19 | 77% | Francisella sp. TX077308, complete genome                                           | 62.1 | 20% | 2,00E-06 | 95% |
| >contig165644 length=144 numreads=6<br>AAAAGTACCTCACGCCCTTTGGGTAGTAAAGCCTCATCTATCTGCAATAAAA<br>TTATA<br>GATATTCGAAGGAGTAAATAGCATCGCTCGTCAAACTCAAAAACAAAC<br>TATCAA<br>CACAAATGCAACAAAGCAACTAC<br>>contig55685 length=334 numreads=15<br>AAACCTGAGCCTCGTATTGCTTGAAGTAAAGAGTTTCAGCTTGGTCATCTGGT<br>GATGT<br>CCTAACGATAAATAGGAGCAGGGTAGTTAGCCATTTGTTCAAAAAAGCT<br>ATTCGT<br>TGCTGCTTCCCAAGCTTCAAACTTTCTCCTTAGTACTTTTCAAGTTTATGT<br>GTA<br>ATAAATGCGATATTGTTATCATCAAAATATTGTTACAATACTGTTGCCAATATT<br>AGCA<br>TCAGAGTGAATAGCATGGTTTATATATAGTATgATGGAAATTTAATTTCTTT<br>GAAA<br>ATATCAACTAATACGCTAGAGTCAATGCCACCAC<br>>contig149397 length=158 numreads=10<br>CAAAGATTCTTCTTAAATCACCGTCAGTAAATATACCTAGTAGCTCATTGTTTCA<br>GTAA<br>TAAGAGTATTACCTATACCTTACTACTAATTTGCGATTTGCTTACGAATAGTG<br>TCTG<br>TTGGTTTATAGTGGGATTTCATTTCTCTACGCATA<br>>contig74482 length=266 numreads=14<br>cccccttgcctCCTaCTATGTCGAGTAGGTAACCAGACTGCTCGTTGGGTTCC<br>C<br>CCCATTCGAAATCTCCGGATCATAGGTCATTTACCACCTAACGAgAAGCTTATCGC<br>AGAT<br>TAACACGTCCTTCTCGCTCTGAATGCCAAGGCACTCCGCCACTTGCACTTATTTT<br>CTTA<br>AGTCTATCTTACTAAATGTTAAATATCTCTATCTCATGCAAAATAATATTG<br>GTGG<br>AGCCTAGCGGGATGAAACCGCTGACC | Francisella tularensis subsp. holarctica PHIT-FT049, complete genome ribosomal rRNA                                                                                                                                                              |      |      |     |          |     | Francisella tularensis subsp. holarctica PHIT-FT049, complete genome ribosomal rRNA | 1111 | 90% | 4,00E-99 | 92% |

|                                                                                                                                                                                                                                                                                                                                                                                                                                                                                                                                                                                                                                                                                                                                                                                                                                                                                                                                                                                                                                                                                                                                                                                                                                                                                                                                                                                                                                                                                                                                                                                                                                                                                                                                                                                                                                                                                                                                                                                                                                                                                                                                                                                                                                                                                                                                                                                                                                                                               |                                                                                                                                                                                                                                                                                                                                                                                                                                                                                                                                                                                                                                                                                                                                                                                                                                                                                                                                                                                                                                                                                                                                                                                                                                                                                                                                                                                                                                           |      |      |     |          |     |                                                                         |     |     |          |     |
|-------------------------------------------------------------------------------------------------------------------------------------------------------------------------------------------------------------------------------------------------------------------------------------------------------------------------------------------------------------------------------------------------------------------------------------------------------------------------------------------------------------------------------------------------------------------------------------------------------------------------------------------------------------------------------------------------------------------------------------------------------------------------------------------------------------------------------------------------------------------------------------------------------------------------------------------------------------------------------------------------------------------------------------------------------------------------------------------------------------------------------------------------------------------------------------------------------------------------------------------------------------------------------------------------------------------------------------------------------------------------------------------------------------------------------------------------------------------------------------------------------------------------------------------------------------------------------------------------------------------------------------------------------------------------------------------------------------------------------------------------------------------------------------------------------------------------------------------------------------------------------------------------------------------------------------------------------------------------------------------------------------------------------------------------------------------------------------------------------------------------------------------------------------------------------------------------------------------------------------------------------------------------------------------------------------------------------------------------------------------------------------------------------------------------------------------------------------------------------|-------------------------------------------------------------------------------------------------------------------------------------------------------------------------------------------------------------------------------------------------------------------------------------------------------------------------------------------------------------------------------------------------------------------------------------------------------------------------------------------------------------------------------------------------------------------------------------------------------------------------------------------------------------------------------------------------------------------------------------------------------------------------------------------------------------------------------------------------------------------------------------------------------------------------------------------------------------------------------------------------------------------------------------------------------------------------------------------------------------------------------------------------------------------------------------------------------------------------------------------------------------------------------------------------------------------------------------------------------------------------------------------------------------------------------------------|------|------|-----|----------|-----|-------------------------------------------------------------------------|-----|-----|----------|-----|
| >contig75395 length=263 numreads=9<br>GTCTCAGTCAACATCTAGAGGTAGAATTACTGCTCGTCAAATCGAAGCAGGAA<br>GAAGAG<br>CTATTAACCGTCATGTTAAGCGTGGTGAAGGTTGGATCAGAATTTTCCAGA<br>CAAGC<br>CTATTACTAAGAAACCTCTTGAaGTTCTGTATGGTAAAGTAAaGGTTCGGTTGA<br>GTATT<br>GGGTGCTCAAATCAACCAGTCTGTACTATATGAATAACTGGTGTAAAG<br>AAGAGC<br>TAGCACGTGAAGCTTCCAGAGA<br>>contig46885 length=388 numreads=16<br>TTCTACTATAGACAATTACATAGCAATCTAAAATGATAAAAATAAATAAGATT<br>CACT<br>AAACTTTAACTAAAATGATCAAAGTACTCATTAAACGCAAATGGTATCCGTGC<br>AGCTA<br>CTCGTaaGGGTTTTGGGATTTGGTTCAAACTCAAGATATCGACTTTTTATGTATC<br>CAAG<br>AAACAAAGGCTCAATTTCACTCACTGAGGAGATAGTCAGTACTTCCCGAAG<br>GTTATC<br>ATTATGACTTTAAAGATGCTGTTAAAAAGGCTATAGTGGTACTGCTATTATGC<br>AAAGA<br>AAAAAACCCTAAAAGTTATCAAAGAGCTTGGGTTGACTGGGCTGATAATGAAG<br>GTCGTT<br>ATATTCAATTTGATTATGAGAAtttAG<br>>contig100814 length=212 numreads=10<br>TATAACTTTTCTATAAGGTGCTTCTAAGAAACCATAAATCATTACACGACATAAC<br>TTGC<br>CAATGAGTTAATTAGACCAATATTGGACCTCTGGAGTTCAATCGGACATAAT<br>CTACC<br>ATAGTGAGTAGCATGATACACGCACTTCAAAGCCTGCTCTATCTAGATAAAC<br>CACC<br>TGGGCTTAAAGCTGAGATTCTACGCTTATGCG<br>>contig89845 length=230 numreads=9<br>ATCTCTCTACCAATGCAAACCAATTGGCTCCATACCCATAGACTCTAAAGATA<br>CCGT<br>ACCTGCTAGCACAAATCAATCAGACCATGAAACAGCATACCGTATTTTTTTTA<br>ATTGG<br>CCATAAAAGTTGACGGGCTTTATCAAGGTTTAcATTATCTGGCCAGCTGTTAAAT<br>GGAGA<br>GAACCTTTGTTGGCCACGGTTAGCTCTCCACGACCATCAGATACTCTAT<br>>contig137266 length=169 numreads=6<br>TACAAAACCTGCTGATTACCTAATGGTAAATCAGTACCAGAAAGTTTTGTATCA<br>GGCAA<br>CCATAAAATATAGCAAAATGGAGCGTAAACAAAAGTTAATAAGAACTATGA<br>GCGTCG<br>TAAAGATTTAATGAAGTGCCTATGCCTACCCAGAAGATAAGCAATTA<br>>contig116524 length=190 numreads=6<br>AATGTAAATaacTAGAGCAGGTTAGAGCTGTGATGGAAGCTGTGATAAAGTAA<br>acTCA<br>CCAGTTATCTCAAGGTTCTGACAGTGCAAGAAAGTACGAGGTGCTCCTTCA<br>TCAGA<br>CATCTTGATTAGTCTGCTATTGAAGAGTATCCACATCTGCTGTATATGCACCA<br>AGAT<br>CATGGTACAT<br>>contig83550 length=243 numreads=10<br>ATCAATGATAAAGGTTACAATCTCTCAAATAATAGTAAATTAAGTGTATGTC<br>ACTG<br>AATGCTGACAAATTTCTCTAGCAGATGGTAAACATTAAGAAGAGTCAAGTTTTG<br>ATCTA<br>TCTCAACAAGATTTTCATCATATTATTTCAAAAATTGATTTTCAATGGCAAATGA<br>TGAT<br>ACAAGATATTCTCTTAACGGAATGTTTTGGGAAGTGAATGTAATCTTTAAGAG<br>CGGTA<br>TCT<br>>contig153145 length=155 numreads=8<br>TTTCTGAGTGAACATCAATAAGCTTATGATCAAAGGCTTTTAATCTTATCTG<br>ATTC<br>TTTGATTTTTATAGCAATTTTATTTTATCTTAAATATGATGACGAGATTGG<br>ATG<br>ATATCTTCAGCGATATTGTTGGAACCTCAGCATAAaCcGGCGCGATGCAATCG<br>TACTCATGACCGAATGGAATCAGTACC | 50S ribosomal protein L16 [Halomonas]<br>>gb EGP19020.1  50S ribosomal protein<br>L16 [Halomonas sp. TD01]<br>>gb EHA14395.1  50S ribosomal protein<br>L16 [Halomonas sp. HAL1] >gb EHJ94064.1 <br>50S ribosomal protein L16 [Halomonas<br>boliviensis LC1] >gb EHK60828.1  50S<br>ribosomal protein L16 [Halomonas sp. GFAJ-<br>1] >emb CDG52359.1  50S ribosomal<br>protein L16 [Halomonas sp. A3H3]<br><br>hypothetical protein [Francisella cf.<br>novicida Fx1] >ref WP_014549715.1 <br>hypothetical protein [Francisella novicida]<br>>gb AEB27795.1  Exodeoxyribonuclease III<br>[Francisella cf. novicida Fx1]<br><br>DNA-directed RNA polymerase subunit<br>beta [Francisella tularensis subsp.<br>holarctica F92] >ref WP_015083882.1  DNA-<br>directed RNA polymerase subunit beta<br>[Francisella tularensis] >gb AFX71360.1 <br>DNA-directed RNA polymerase subunit<br>beta [Francisella tularensis subsp.<br>holarctica F92]<br><br>catalase/peroxidase HPI, partial [Francisella<br>tularensis]<br><br>hypothetical protein [Francisella cf.<br>novicida Fx1]<br><br>fructose-1,6-bisphosphate aldolase<br>[Francisella noatunensis subsp. orientalis<br>str. Toba 04]<br><br>DNA polymerase III subunit beta<br>[Francisella tularensis] >gb EET20098.1 <br>DNA polymerase III [Francisella tularensis<br>subsp. tularensis MA00-2987]<br><br>30S ribosomal protein S10 [Francisella<br>tularensis subsp. holarctica LVS] | 159  | 159  | 85% | 1,00E-47 | 88% | Francisella tularensis subsp. holarctica F92,<br>complete genome        | 313 | 85% | 8,00E-82 | 89% |
|                                                                                                                                                                                                                                                                                                                                                                                                                                                                                                                                                                                                                                                                                                                                                                                                                                                                                                                                                                                                                                                                                                                                                                                                                                                                                                                                                                                                                                                                                                                                                                                                                                                                                                                                                                                                                                                                                                                                                                                                                                                                                                                                                                                                                                                                                                                                                                                                                                                                               |                                                                                                                                                                                                                                                                                                                                                                                                                                                                                                                                                                                                                                                                                                                                                                                                                                                                                                                                                                                                                                                                                                                                                                                                                                                                                                                                                                                                                                           | 196  | 196  | 76% | 6,00E-60 | 88% | Francisella tularensis subsp. holarctica PHIT-FT049,<br>complete genome | 292 | 72% | 1,00E-75 | 85% |
|                                                                                                                                                                                                                                                                                                                                                                                                                                                                                                                                                                                                                                                                                                                                                                                                                                                                                                                                                                                                                                                                                                                                                                                                                                                                                                                                                                                                                                                                                                                                                                                                                                                                                                                                                                                                                                                                                                                                                                                                                                                                                                                                                                                                                                                                                                                                                                                                                                                                               |                                                                                                                                                                                                                                                                                                                                                                                                                                                                                                                                                                                                                                                                                                                                                                                                                                                                                                                                                                                                                                                                                                                                                                                                                                                                                                                                                                                                                                           | 156  | 156  | 80% | 5,00E-42 | 99% | Francisella tularensis subsp. holarctica PHIT-FT049,<br>complete genome | 278 | 79% | 2,00E-71 | 91% |
|                                                                                                                                                                                                                                                                                                                                                                                                                                                                                                                                                                                                                                                                                                                                                                                                                                                                                                                                                                                                                                                                                                                                                                                                                                                                                                                                                                                                                                                                                                                                                                                                                                                                                                                                                                                                                                                                                                                                                                                                                                                                                                                                                                                                                                                                                                                                                                                                                                                                               |                                                                                                                                                                                                                                                                                                                                                                                                                                                                                                                                                                                                                                                                                                                                                                                                                                                                                                                                                                                                                                                                                                                                                                                                                                                                                                                                                                                                                                           | 154  | 154  | 91% | 7,00E-45 | 96% | Francisella tularensis subsp. holarctica F92,<br>complete genome        | 248 | 91% | 2,00E-62 | 86% |
|                                                                                                                                                                                                                                                                                                                                                                                                                                                                                                                                                                                                                                                                                                                                                                                                                                                                                                                                                                                                                                                                                                                                                                                                                                                                                                                                                                                                                                                                                                                                                                                                                                                                                                                                                                                                                                                                                                                                                                                                                                                                                                                                                                                                                                                                                                                                                                                                                                                                               |                                                                                                                                                                                                                                                                                                                                                                                                                                                                                                                                                                                                                                                                                                                                                                                                                                                                                                                                                                                                                                                                                                                                                                                                                                                                                                                                                                                                                                           | 107  | 107  | 83% | 6,00E-27 | 84% | Francisella tularensis subsp. holarctica PHIT-FT049,<br>complete genome | 215 | 82% | 1,00E-52 | 90% |
|                                                                                                                                                                                                                                                                                                                                                                                                                                                                                                                                                                                                                                                                                                                                                                                                                                                                                                                                                                                                                                                                                                                                                                                                                                                                                                                                                                                                                                                                                                                                                                                                                                                                                                                                                                                                                                                                                                                                                                                                                                                                                                                                                                                                                                                                                                                                                                                                                                                                               |                                                                                                                                                                                                                                                                                                                                                                                                                                                                                                                                                                                                                                                                                                                                                                                                                                                                                                                                                                                                                                                                                                                                                                                                                                                                                                                                                                                                                                           | 133  | 133  | 80% | 1,00E-35 | 98% | Francisella tularensis subsp. holarctica PHIT-FT049,<br>complete genome | 191 | 80% | 3,00E-45 | 85% |
|                                                                                                                                                                                                                                                                                                                                                                                                                                                                                                                                                                                                                                                                                                                                                                                                                                                                                                                                                                                                                                                                                                                                                                                                                                                                                                                                                                                                                                                                                                                                                                                                                                                                                                                                                                                                                                                                                                                                                                                                                                                                                                                                                                                                                                                                                                                                                                                                                                                                               |                                                                                                                                                                                                                                                                                                                                                                                                                                                                                                                                                                                                                                                                                                                                                                                                                                                                                                                                                                                                                                                                                                                                                                                                                                                                                                                                                                                                                                           | 145  | 145  | 89% | 5,00E-40 | 83% | Francisella tularensis subsp. holarctica PHIT-FT049,<br>complete genome | 183 | 87% | 6,00E-43 | 80% |
|                                                                                                                                                                                                                                                                                                                                                                                                                                                                                                                                                                                                                                                                                                                                                                                                                                                                                                                                                                                                                                                                                                                                                                                                                                                                                                                                                                                                                                                                                                                                                                                                                                                                                                                                                                                                                                                                                                                                                                                                                                                                                                                                                                                                                                                                                                                                                                                                                                                                               |                                                                                                                                                                                                                                                                                                                                                                                                                                                                                                                                                                                                                                                                                                                                                                                                                                                                                                                                                                                                                                                                                                                                                                                                                                                                                                                                                                                                                                           | 55.1 | 55.1 | 32% | 6,00E-08 | 96% | Francisella tularensis subsp. holarctica PHIT-FT049,<br>complete genome | 187 | 65% | 4,00E-44 | 89% |

|                                                                                                                                                                                                                                                                                                                                                                                                                                                                                                                                                                                                                                                                                                                                                                                                                                                                                                                                                                                                                                                                                                                                                                                                                                                                                                                                                                                                                                                                                                                                                                                                                                                                                                                                                                                                                                                                                                                                                                                                                                                                                                                                                                                                                                                                                                                                                      |                                                                                                                                                                                                               |      |     |          |          |                                                                         |                                                                  |     |          |          |     |
|------------------------------------------------------------------------------------------------------------------------------------------------------------------------------------------------------------------------------------------------------------------------------------------------------------------------------------------------------------------------------------------------------------------------------------------------------------------------------------------------------------------------------------------------------------------------------------------------------------------------------------------------------------------------------------------------------------------------------------------------------------------------------------------------------------------------------------------------------------------------------------------------------------------------------------------------------------------------------------------------------------------------------------------------------------------------------------------------------------------------------------------------------------------------------------------------------------------------------------------------------------------------------------------------------------------------------------------------------------------------------------------------------------------------------------------------------------------------------------------------------------------------------------------------------------------------------------------------------------------------------------------------------------------------------------------------------------------------------------------------------------------------------------------------------------------------------------------------------------------------------------------------------------------------------------------------------------------------------------------------------------------------------------------------------------------------------------------------------------------------------------------------------------------------------------------------------------------------------------------------------------------------------------------------------------------------------------------------------|---------------------------------------------------------------------------------------------------------------------------------------------------------------------------------------------------------------|------|-----|----------|----------|-------------------------------------------------------------------------|------------------------------------------------------------------|-----|----------|----------|-----|
| >contig67256 length=287 numreads=13<br>CAGATGGAAaGGCATTGTATTCTGCATTTTTCTCTTTATAGATAACtCAA<br>TAA<br>ACTCATCACCTAAAACACTTCAGCACCTAATGCTTCAAGCCCTCAAGATGTAT<br>ATCAA<br>AAGGTCTTTTTCTACTAAAACCTACAGCCTCTGGAAACCAATTTTACAGACTT<br>TTTT<br>GCTTTAGCATCGCTCTAGAAGCATTAGTGAACAACGAGTTTTGTGTTGATT<br>ACCAC<br>ATAACTCTAACGTATCCTTTGTAATTTACTTGTATCTATAGCTACA<br>>contig116293 length=191 numreads=6<br>AATCTCTGTTAGAGATTTCTACCTAAATAGGTATTTTCATCAACTGTGACTCAG<br>AATA<br>CTGTACCAAAATCACCAAGATACCTGATATttCAGCTCTAAACAGTTAGAAGATC<br>TAAC<br>AGTAAGCTCTAAATCATCAATTGGTTTTAGTAACATTGGTCAATATTAGAATCC<br>GCCAA<br>AGGATCCCCG<br>>contig81323 length=247 numreads=9<br>TATAGATGCAGAAGCTAGTGATATAACTATCGAGATACAAGAGGGCGGTAAGT<br>CATTAT<br>TCGTATAAGAGATAATGGTAAAGGATTTCAAAGATGATTTAGCACTAGCACT<br>AGCAC<br>TCATGCTaCAAGTAAGGTTTTAATCTTGATGAGCTAgAATCTGATAGTATG<br>GGTTT<br>TCGTGGCAGGCTTAGCAAGTATTGGTTCTGTTGCAAAGTTAAGATAATCTCA<br>AAACA<br>cATAAGT<br>>contig170585 length=140 numreads=7<br>AAGATACGAATCTATAGCAAATGCTGATTTAAaCGAAGGTGATGCTGATTATGC<br>AATCAA<br>AGTTGATTTGATAAAGATGCAAAAACATAACTGTTAGCGATAATGtTaTCGGT<br>ATGAC<br>TGAAGAAGGTTATCGAAA<br>>contig140423 length=166 numreads=6<br>TAAGTTTAAGTTCATTAAACATTGAACAAAATAGCGCCATATTTGATTAAAC<br>AGATG<br>ATCTtttHGATATAAATCACCAGAATCTGGTTATCTCAGTATAGAAAGACCA<br>ATAA<br>GCCAGTACAAGAAACATCCCCTATATCCTTCAAAGATATCCTTT<br>>contig185854 length=125 numreads=6<br>CGACAACACCCATAAAATGTAAGTGGTATAAATTTTTCCAACCTAAACGCAT<br>AATTT<br>GGTCATATCTGTATCTGGGTAAGTAGCTCTTATCCATAAAAACATAAACATAAA<br>TATAC<br>CTGTT<br>>contig152091 length=156 numreads=7<br>TTtCAAATTTGGTTTTATATAGTTACCATCTTTGCAATAGCAGATGCTCTCG<br>CAAC<br>TAGTTGCATATCAGTAGCATTACACATAACAAAAGATAATGTAGCAAGTTGG<br>AAATC<br>ACCCCACTTATCTTAAACAGGCACAAATCCTTCTCG<br>>contig85599 length=239 numreads=12<br>TATTCCACCCTCTtttAGGAAGCTCTGTAATCTGTTGATATGCTCCAATATGTT<br>GAT<br>TAGATATTACAAAATCTCTAACAGCACCTTCGCCACCATTTTTGACATCTTA<br>CATC<br>AGCATAATCTTAAACAATATCCATAGAATCGCTGGAGCTGCAGATATCCCAACT<br>TTATT<br>CATAAGAGTTATATCAGGCAATCATACCCATATAAGCAATTTGTGAATCGTTG<br>AGAC<br>>contig110799 length=198 numreads=7<br>TTCTTTTTCAAGATGATTCGTAACACTACAAATTGCTCACCTGAAGGTGACTTT<br>CTGC<br>ATACAAAGATAATGcTCTGTGATAGAGGGTCAACGGCTCAAAGGTTTTATAG<br>CAACC<br>TGAAAACAATGTTATAACTTCATCAAGAAGAAGTTGATATCTTAATGAAGGTT<br>GAGAC<br>TCACAATCACCTACAGC | UDP-N-acetylglucosamine 1-<br>carboxyvinyltransferase [Francisella<br>tularensis] >gb EBA52105.1  UDP-N-<br>acetylglucosamine 1-<br>carboxyvinyltransferase [Francisella<br>tularensis subsp. holarctica 257] | 166  | 166 | 86%      | 2,00E-48 | 81%                                                                     | Francisella tularensis subsp. holarctica F92,<br>complete genome | 182 | 68%      | 2,00E-42 | 81% |
| DNA-directed RNA polymerase subunit<br>alpha [Francisella noatunensis]                                                                                                                                                                                                                                                                                                                                                                                                                                                                                                                                                                                                                                                                                                                                                                                                                                                                                                                                                                                                                                                                                                                                                                                                                                                                                                                                                                                                                                                                                                                                                                                                                                                                                                                                                                                                                                                                                                                                                                                                                                                                                                                                                                                                                                                                               | 122                                                                                                                                                                                                           | 122  | 82% | 9,00E-32 | 94%      | Francisella tularensis subsp. holarctica PHIT-FT049,<br>complete genome | 176                                                              | 71% | 8,00E-41 | 86%      |     |
| DNA mismatch repair protein [Francisella<br>tularensis subsp. tularensis SCHU 54]                                                                                                                                                                                                                                                                                                                                                                                                                                                                                                                                                                                                                                                                                                                                                                                                                                                                                                                                                                                                                                                                                                                                                                                                                                                                                                                                                                                                                                                                                                                                                                                                                                                                                                                                                                                                                                                                                                                                                                                                                                                                                                                                                                                                                                                                    | 135                                                                                                                                                                                                           | 135  | 82% | 4,00E-35 | 84%      | Francisella tularensis subsp. holarctica F92,<br>complete genome        | 182                                                              | 71% | 2,00E-42 | 82%      |     |
| chaperone protein HtpG [Francisella sp.<br>TX077308] >ref WP_013922041.1  heat<br>shock protein 90 [Francisella sp. TX077308]<br>>gb AEI35188.1  Chaperone protein HtpG<br>[Francisella sp. TX077308]                                                                                                                                                                                                                                                                                                                                                                                                                                                                                                                                                                                                                                                                                                                                                                                                                                                                                                                                                                                                                                                                                                                                                                                                                                                                                                                                                                                                                                                                                                                                                                                                                                                                                                                                                                                                                                                                                                                                                                                                                                                                                                                                                | 83.6                                                                                                                                                                                                          | 83.6 | 77% | 4,00E-17 | 87%      | Francisella tularensis subsp. holarctica PHIT-FT049,<br>complete genome | 167                                                              | 69% | 3,00E-38 | 91%      |     |
| hypothetical protein [Francisella<br>philomiragia] >gb EET1254.1  conserved<br>hypothetical protein [Francisella<br>philomiragia subsp. philomiragia ATCC<br>25015]                                                                                                                                                                                                                                                                                                                                                                                                                                                                                                                                                                                                                                                                                                                                                                                                                                                                                                                                                                                                                                                                                                                                                                                                                                                                                                                                                                                                                                                                                                                                                                                                                                                                                                                                                                                                                                                                                                                                                                                                                                                                                                                                                                                  | 110                                                                                                                                                                                                           | 110  | 87% | 2,00E-27 | 93%      | Francisella tularensis subsp. holarctica PHIT-FT049,<br>complete genome | 163                                                              | 88% | 5,00E-37 | 84%      |     |
| NADH dehydrogenase I subunit H<br>[Francisella tularensis subsp. mediasiatica<br>FSC147]                                                                                                                                                                                                                                                                                                                                                                                                                                                                                                                                                                                                                                                                                                                                                                                                                                                                                                                                                                                                                                                                                                                                                                                                                                                                                                                                                                                                                                                                                                                                                                                                                                                                                                                                                                                                                                                                                                                                                                                                                                                                                                                                                                                                                                                             | 85.9                                                                                                                                                                                                          | 85.9 | 71% | 8,00E-19 | 95%      | Francisella tularensis subsp. holarctica PHIT-FT049,<br>complete genome | 150                                                              | 68% | 3,00E-33 | 90%      |     |
| Cell division protein FtsI/penicillin-binding<br>protein [Francisella noatunensis subsp.<br>orientalis str. Toba 04]<br>>ref WP_014715143.1  cell division protein<br>[Francisella noatunensis] >gb AFJ43612.1 <br>Cell division protein FtsI/penicillin-binding<br>protein [Francisella noatunensis subsp.<br>orientalis str. Toba 04]                                                                                                                                                                                                                                                                                                                                                                                                                                                                                                                                                                                                                                                                                                                                                                                                                                                                                                                                                                                                                                                                                                                                                                                                                                                                                                                                                                                                                                                                                                                                                                                                                                                                                                                                                                                                                                                                                                                                                                                                              | 104                                                                                                                                                                                                           | 104  | 75% | 1,00E-24 | 92%      | Francisella tularensis subsp. holarctica PHIT-FT049,<br>complete genome | 139                                                              | 61% | 9,00E-30 | 87%      |     |
| 3-deoxy-D-manno-octulosonate 8-<br>phosphate phosphatase [Francisella cf.<br>novicida 3523]                                                                                                                                                                                                                                                                                                                                                                                                                                                                                                                                                                                                                                                                                                                                                                                                                                                                                                                                                                                                                                                                                                                                                                                                                                                                                                                                                                                                                                                                                                                                                                                                                                                                                                                                                                                                                                                                                                                                                                                                                                                                                                                                                                                                                                                          | 115                                                                                                                                                                                                           | 115  | 85% | 4,00E-30 | 65%      | Francisella tularensis subsp. holarctica PHIT-FT049,<br>complete genome | 143                                                              | 60% | 1,00E-30 | 82%      |     |
| phosphoribosylformylglycinamide<br>synthase [Francisella tularensis subsp.<br>holarctica]                                                                                                                                                                                                                                                                                                                                                                                                                                                                                                                                                                                                                                                                                                                                                                                                                                                                                                                                                                                                                                                                                                                                                                                                                                                                                                                                                                                                                                                                                                                                                                                                                                                                                                                                                                                                                                                                                                                                                                                                                                                                                                                                                                                                                                                            | 119                                                                                                                                                                                                           | 119  | 78% | 8,00E-29 | 85%      | Francisella tularensis subsp. holarctica PHIT-FT049,<br>complete genome | 130                                                              | 59% | 6,00E-27 | 83%      |     |

|                                                                                                                                                                                                                                                                                                                                                                                                                                                                                                                                                                                                                                                                                                                                                                                                                                                                                     |                                                                                                                                                                                                                                                                                                                                                                                                                                                                                                                                                                                                                                                                                            |      |      |     |          |     |                                                                         |     |     |          |     |
|-------------------------------------------------------------------------------------------------------------------------------------------------------------------------------------------------------------------------------------------------------------------------------------------------------------------------------------------------------------------------------------------------------------------------------------------------------------------------------------------------------------------------------------------------------------------------------------------------------------------------------------------------------------------------------------------------------------------------------------------------------------------------------------------------------------------------------------------------------------------------------------|--------------------------------------------------------------------------------------------------------------------------------------------------------------------------------------------------------------------------------------------------------------------------------------------------------------------------------------------------------------------------------------------------------------------------------------------------------------------------------------------------------------------------------------------------------------------------------------------------------------------------------------------------------------------------------------------|------|------|-----|----------|-----|-------------------------------------------------------------------------|-----|-----|----------|-----|
| >contig134387 length=172 numreads=8<br>AAAATACTGTAACACAGTAAAGTTGATAATTCAAATGCCATGCATCACCTGC<br>AGTTA<br>GAAAGCTTGAAGAATCTTGAATGAAACCAAGCAAGTAAAGCGCACTGGTC<br>GCAAG<br>GTAGAGTTCAAAAAGATTGTATAACTATATAAAAATGCTGTAACACA                                                                                                                                                                                                                                                                                                                                                                                                                                                                                                                                                                                                                                                              | dihydropolipoamide acetyltransferase<br>component of pyruvate dehydrogenase<br>complex [Francisella sp. TX077308]<br>>ref WP_013922551.1  dihydropolipoamide<br>acetyltransferase [Francisella sp. TX077308]<br>>gb AEI35711.1  Dihydropolipoamide<br>acetyltransferase component of pyruvate<br>dehydrogenase complex [Francisella sp.<br>TX077308]<br>cell division protein FtsW [Francisella sp.<br>TX077308] >ref WP_013923546.1  cell<br>division protein FtsW [Francisella sp.<br>TX077308] >sp F8GAB4.1 FTSW_FRAST<br>RecName: Full=Lipid II flippase FtsW;<br>AltName: Full=Cell division protein FtsW<br>>gb AEI36717.1  Cell division protein FtsW<br>[Francisella sp. TX077308] | 100  | 100  | 75% | 1,00E-23 | 88% | Francisella tularensis subsp. holarctica PHIT-FT049,<br>complete genome | 126 | 73% | 7,00E-26 | 80% |
| >contig146319 length=160 numreads=9<br>CCTATTCACCTCTGGTTGTATAGCTATACTTTGCTGATGCAACAGATTTGGT<br>TCT<br>ACAGTgTTATATCAATATGTGCTCTGGCATGCTTTTTGTTGGTGAATAAAGT<br>TCAA<br>TGGTATGGTTTACTTATTGTTGCTATGATAccAATGGCTG<br>>contig108310 length=201 numreads=8<br>GCAAAAGTATAAAAGTATCGCTTTGCATATTGACTGTTCAACTAGGAAGCAAAA<br>TATCGA<br>TCAAAAATATATTGATGCTTTAAATAGTGTGCAAAAGAAAGTTGAACTCTGAA<br>ATGAT<br>ATATTGTTGGTTTTGCTGGTGAATAAGGCTTTAGTGTACCGGAGTAAATGCT<br>AGTAG<br>TTTATCGGGATTGCAGTCTCA<br>>contig59621 length=316 numreads=10<br>AATTATGAATATTGTATGGGTACTTACGCTGCTGATTTTATGATCTTAAAA<br>TAAT<br>ATACTATCCACCTTAGCTAAAATAGCAGGGCGTTTAAAGCAAGCTGGTAAATTT<br>TAATC<br>AAAACCTCACATCAAAACCATAGTACTAACTATGTTTTCTTAATGATAGCCA<br>TCTA<br>CTACTATCACATAaGCACACCAAAAATACTAAATTTTAGTGGAGTtATTAGATG<br>ATTT<br>ATTAcTTTGTCAAAGCAAGTAAATAATCAAGCTAGTACTGCAAAATATAAA<br>CCCT<br>TTAGGCTACTTTATAA | 4Fe-4S ferredoxin [Francisella tularensis]<br>>gb EBA52400.1  4Fe-4S ferredoxin, FAD<br>dependent [Francisella tularensis subsp.<br>holarctica 257]                                                                                                                                                                                                                                                                                                                                                                                                                                                                                                                                        | 92.0 | 92.0 | 85% | 1,00E-20 | 85% | Francisella tularensis subsp. holarctica PHIT-FT049,<br>complete genome | 122 | 64% | 8,00E-25 | 85% |
| >contig134628 length=172 numreads=6<br>GACTTATGGTCTTTTGGAAAGTTTTGAATAGCTTAGCTGATGGCCCTGGCGATT<br>CCATa<br>gAAAGAGCAAGaAcAAGAGGACCGACTAAAGCGTcATCAAGCACTCAAAGTCA<br>GTTCTC<br>TtAaTTGCTAAACGTGCTAAGTTGTTGGTCAACAACCTTAAATAAACTCCAG<br>>contig96801 length=218 numreads=12<br>AAAGGCGCAAAATTTTGAATATACTCTTTTTCAACCTTTGTTATTTGCCATTTT<br>TCC<br>AGTcaGTAACCTCTCAGAAAGATCAATTTTCATCTTCTACAGTGAAGCTTTTTCA<br>TGCT<br>TAACCGTTAGTCAACAGCCCATGGATACAAAAAGGTTTATAAGTTTTGAAG<br>CAGTAG<br>TTAATGATGAGCCTTAACCTGATTAATAACCTCACCA                                                                                                                                                                                                                                                                                                                                                              | 50S ribosomal protein L10 [Francisella<br>tularensis subsp. mediasiatica FSC147]<br>>ref WP_012429128.1  50S ribosomal<br>protein L10 [Francisella tularensis]<br>>sp B25FD4.1 RL10_FRATM RecName:<br>Full=50S ribosomal protein L10<br>>gb ACD30287.1  50S ribosomal protein<br>L10 [Francisella tularensis subsp.<br>mediasiatica FSC147]                                                                                                                                                                                                                                                                                                                                                | 103  | 103  | 82% | 1,00E-25 | 84% | Francisella tularensis subsp. mediasiatica FSC147,<br>complete genome   | 224 | 81% | 2,00E-55 | 91% |
| >contig87468 length=235 numreads=10<br>TGCGTTTATTTTACTGGCACATATATTTTGAATAATAATCTGGCACAGCA<br>ACCT<br>TGTTATAACCGATAGTTTATATACTTTTGTCTTTTATATATATGACCGTGTATACA<br>CAT<br>AAATACTATCATACATATTTGCCAGATTCTCTCATCTGTTCTAATCTTTCCCAAC<br>CTT<br>GCCTATTTAAGCCCGCTTTTGTGGCAGCATATTTGATGATAAAAATGATTATC<br>>contig106923 length=201 numreads=8<br>ATGCTCAGCATTAGCTATAGCTGAATTAAGAACTCCTTAATTAGCACAGCAGCT<br>TTTTT<br>GTACTGAAGTCAAAGATTGATAGCTTCTACAGGTAGTCTCTGATTTGAT<br>CAGC<br>AACTAACCTACACTTTTGGAGTGAGATcTtgCAAAttttAAATTTAGCTTGTACTCC<br>AT<br>AAATACCTCAACTATTCTTC                                                                                                                                                                                                                                                                                                                   | bifunctional gluaredoxin/ribonucleoside-<br>diphosphate reductase subunit [Francisella<br>noatunensis subsp. orientalis str. Toba 04]                                                                                                                                                                                                                                                                                                                                                                                                                                                                                                                                                      | 142  | 142  | 75% | 2,00E-38 | 96% | Francisella tularensis subsp. mediasiatica FSC147,<br>complete genome   | 222 | 76% | 1,00E-54 | 85% |
| >contig87468 length=235 numreads=10<br>TGCGTTTATTTTACTGGCACATATATTTTGAATAATAATCTGGCACAGCA<br>ACCT<br>TGTTATAACCGATAGTTTATATACTTTTGTCTTTTATATATATGACCGTGTATACA<br>CAT<br>AAATACTATCATACATATTTGCCAGATTCTCTCATCTGTTCTAATCTTTCCCAAC<br>CTT<br>GCCTATTTAAGCCCGCTTTTGTGGCAGCATATTTGATGATAAAAATGATTATC<br>>contig106923 length=201 numreads=8<br>ATGCTCAGCATTAGCTATAGCTGAATTAAGAACTCCTTAATTAGCACAGCAGCT<br>TTTTT<br>GTACTGAAGTCAAAGATTGATAGCTTCTACAGGTAGTCTCTGATTTGAT<br>CAGC<br>AACTAACCTACACTTTTGGAGTGAGATcTtgCAAAttttAAATTTAGCTTGTACTCC<br>AT<br>AAATACCTCAACTATTCTTC                                                                                                                                                                                                                                                                                                                   | DNA/RNA endonuclease G [Francisella<br>philomiragia subsp. philomiragia ATCC<br>25017] >ref WP_012279592.1  DNA/RNA<br>endonuclease G [Francisella philomiragia]<br>>gb ABZ86251.1  DNA/RNA endonuclease<br>G [Francisella philomiragia subsp.<br>philomiragia ATCC 25017]                                                                                                                                                                                                                                                                                                                                                                                                                 | 158  | 158  | 85% | 7,00E-45 | 94% | Francisella tularensis subsp. holarctica PHIT-FT049,<br>complete genome | 226 | 84% | 9,00E-56 | 84% |
| >contig106923 length=201 numreads=8<br>ATGCTCAGCATTAGCTATAGCTGAATTAAGAACTCCTTAATTAGCACAGCAGCT<br>TTTTT<br>GTACTGAAGTCAAAGATTGATAGCTTCTACAGGTAGTCTCTGATTTGAT<br>CAGC<br>AACTAACCTACACTTTTGGAGTGAGATcTtgCAAAttttAAATTTAGCTTGTACTCC<br>AT<br>AAATACCTCAACTATTCTTC                                                                                                                                                                                                                                                                                                                                                                                                                                                                                                                                                                                                                      | 50S ribosomal protein L22 [Francisella<br>philomiragia] >gb EET20366.1  50S<br>ribosomal protein L22 [Francisella<br>philomiragia subsp. philomiragia ATCC<br>25015]                                                                                                                                                                                                                                                                                                                                                                                                                                                                                                                       | 116  | 116  | 82% | 2,00E-31 | 93% | Francisella tularensis subsp. mediasiatica FSC147,<br>complete genome   | 207 | 88% | 3,00E-50 | 86% |

|                                                                                                                                                                                                                                                                                                                                                                                                                                                                                                                                                                                                                                                                                                                                                                                                                                                                                                                                                                                                       |                                                                                                                                                                                                                                                                                                                       |      |      |     |          |     |                                                                    |      |     |          |     |
|-------------------------------------------------------------------------------------------------------------------------------------------------------------------------------------------------------------------------------------------------------------------------------------------------------------------------------------------------------------------------------------------------------------------------------------------------------------------------------------------------------------------------------------------------------------------------------------------------------------------------------------------------------------------------------------------------------------------------------------------------------------------------------------------------------------------------------------------------------------------------------------------------------------------------------------------------------------------------------------------------------|-----------------------------------------------------------------------------------------------------------------------------------------------------------------------------------------------------------------------------------------------------------------------------------------------------------------------|------|------|-----|----------|-----|--------------------------------------------------------------------|------|-----|----------|-----|
| <p>&gt;contig97529 length=217 numreads=10<br/>TAGTCAATTTAGGAAACAAAACGGTTTTATTATCTATAAACCCATAAAAGATAT<br/>ATTGG<br/>TCAAATTCGAAAGATACGATTATAACAGCATAGACCTTATTCTGTAACAGAT<br/>GGTGA<br/>AGCTGTACTGGgaTAGGAGATCAAGGTATAGTGGGAATGAATATCAGTATCGG<br/>TAAGAT<br/>TATGGTATATGTTGCTGCAAGTGGATTGACCCAGCT<br/>&gt;contig62529 length=303 numreads=14<br/>TGCTTTGTATGAGCATAAAATTTGTTCAAGGTGTTATCTGGGAAGTCTATTCT<br/>TCGA<br/>TCAGTGGGGCGTCAAGTTAGGCAAAGCTTAGCGACGCGAGTTGCTCTGTATGT<br/>GCAGTC<br/>CAGCTGCCAGTCACTCAATACGACAGTTCACCAATGGCCTACTCAACATTTT<br/>AAGGC<br/>TATTAATAAACCTGTTTATTATTACTGTAGCTTGTGTCAGCGTACCCCGCAA<br/>GCGTT<br/>GTGGGTATTTGCCGCAAAATTTATCATCATGAATGAATAAATGCGGCTGT<br/>AATCT<br/>TCA<br/>&gt;contig95667 length=220 numreads=11<br/>ATATATCTTAGCTCAATTAGACGAGCCTATAGATGAGAAAAAGAAAGCTTATA<br/>ATTCTG<br/>CAAAGATAAaTTTTGATCaGTTATTTCTATCTACTACTCGAGCGACTAATC<br/>GAGC<br/>AGGtgAGAAAATTAAGCTGATATCAAGCTGAGTTTGACACTGAAACTCAAA<br/>AAGAA<br/>ACCAAATCAAGAAAAGTIGACAGAGCTACAAGAGAAGTTA</p> | <p>malate dehydrogenase [Francisella tularensis subsp. mediasiatica FSC147]<br/>&gt;ref WP_012429279.1  malate dehydrogenase [Francisella tularensis]<br/>&gt;gb ACD30522.1  NAD-dependent malic enzyme [Francisella tularensis subsp. mediasiatica FSC147]</p>                                                       | 135  | 135  | 84% | 2,00E-35 | 89% | Francisella tularensis subsp. mediasiatica FSC147, complete genome | 185  | 82% | 1,00E-43 | 83% |
| <p>&gt;contig137414 length=169 numreads=9<br/>GTATGGAAGTGTCCATCTTTAGTGAGCTCACTCTGCTAATTTTTACCAGC<br/>TTTT<br/>TGGTCAAGCAAGGCTTATCCCACTCACTACTCCATAACACCTTGATAACATCC<br/>AACCA<br/>GCACCTCAAAACAGCCTGTAATCTTCAACAATATTACCATTACCGT</p>                                                                                                                                                                                                                                                                                                                                                                                                                                                                                                                                                                                                                                                                                                                                                                  | <p>hypothetical protein EMIHURAF_446110 [Emiliania huxleyi CCMP1516]<br/>&gt;gb EOD11446.1  cytosolic glucose-6-phosphate isomerase, partial CCMP1516]</p>                                                                                                                                                            | 97.1 | 97.1 | 57% | 3,00E-21 | 68% | Francisella tularensis subsp. mediasiatica FSC147, complete genome | 75.0 | 25% | 4,00E-10 | 82% |
| <p>&gt;contig141718 length=165 numreads=9<br/>AGTATTACAAGCATACACCCATTGGGTACCAATGTTTTACTGTACTTTTCT<br/>AAA<br/>GTTAGTAGTGCATCTACTAGCTACTACCGCTACTATAGGAGTACTGTTTGTAT<br/>GATC<br/>AACTGATGGACTAGCTCCAATAATATCAGCTCCACCAGCAACAGC</p>                                                                                                                                                                                                                                                                                                                                                                                                                                                                                                                                                                                                                                                                                                                                                                    | <p>transposase [Francisella tularensis subsp. tularensis NE061598]</p>                                                                                                                                                                                                                                                | 129  | 129  | 85% | 4,00E-36 | 89% | Francisella tularensis subsp. novicida U112, complete genome       | 307  | 86% | 3,00E-80 | 92% |
| <p>&gt;contig95191 length=221 numreads=10<br/>CCATTCTCTCTATAGATATTGCTCTAAAACACTCTTAACCCACTCCATCTAGTA<br/>GAG<br/>CCATCATGACTATAAGGtATTTCCAACATGAAAGAATTTGTTAAATGGAACT<br/>TGAG<br/>CGATATATAAAATAGTCATATGGTTCATCTCCACAAATCAATTTTGCAAAATATC<br/>TAAA<br/>AAATAGTTTCTGGATTTCTAATGCTGATCTATAAATTT<br/>&gt;contig80341 length=250 numreads=11<br/>GAAAACAGGCGAGACTGATTCTTAAAAGCTAAGATAACAATTTTACTGACAGGT<br/>GGaGCT<br/>GGTCTGATATAGTCAAGCACAAATGCTATATcAaTACAGGtgATGGTATGG<br/>GTCTA<br/>CCCTTAaGAGTGCATCCCATTTGAGGATATGGAATTTTGGCAGTTCCATCAA<br/>CAGGT<br/>ATTGCTGGAGCTGGTACTTGTACTGAAGGGTCCCGTGGGAGGTGGTATC<br/>TTGCGT<br/>AATAAAGATG<br/>&gt;contig109098 length=200 numreads=7<br/>GCAGATGTATCAAAAATTTACAGCCAGGTAGTATTCTHATACAGTTGATTTGC<br/>TGCT<br/>ACGATATATCTTTTCTTCTCACTCTTTAGTATTAATCTAAAGAAACG<br/>CGG<br/>GATATCTTAAGAAATCTGGTCTTATTTCTGGTGAgaCTGGCGAGCAAA<br/>CTGCC<br/>AAATATATTGATGAGTAAT</p>                                                                                             | <p>Pyruvate dehydrogenase E1 component [Francisella cf. novicida 3523]<br/>&gt;ref WP_014548839.1  pyruvate dehydrogenase [Francisella novicida]<br/>&gt;gb AEE26858.1  Pyruvate dehydrogenase E1 component [Francisella cf. novicida 3523]</p>                                                                       | 107  | 107  | 83% | 4,00E-25 | 89% | Francisella tularensis subsp. novicida U112, complete genome       | 159  | 83% | 7,00E-36 | 84% |
| <p>&gt;contig109098 length=200 numreads=7<br/>GCAGATGTATCAAAAATTTACAGCCAGGTAGTATTCTHATACAGTTGATTTGC<br/>TGCT<br/>ACGATATATCTTTTCTTCTCACTCTTTAGTATTAATCTAAAGAAACG<br/>CGG<br/>GATATCTTAAGAAATCTGGTCTTATTTCTGGTGAgaCTGGCGAGCAAA<br/>CTGCC<br/>AAATATATTGATGAGTAAT</p>                                                                                                                                                                                                                                                                                                                                                                                                                                                                                                                                                                                                                                                                                                                                   | <p>Protein-export membrane protein SecD [Francisella sp. TX077308]<br/>&gt;ref WP_013923354.1  preprotein translocase subunit SecD [Francisella sp. TX077308]<br/>&gt;gb AEI36523.1  Protein-export membrane protein SecD [Francisella sp. TX077308]</p>                                                              | 100  | 100  | 85% | 5,00E-23 | 85% | Francisella tularensis subsp. novicida U112, complete genome       | 147  | 87% | 5,00E-32 | 83% |
| <p>&gt;contig80341 length=250 numreads=11<br/>GAAAACAGGCGAGACTGATTCTTAAAAGCTAAGATAACAATTTTACTGACAGGT<br/>GGaGCT<br/>GGTCTGATATAGTCAAGCACAAATGCTATATcAaTACAGGtgATGGTATGG<br/>GTCTA<br/>CCCTTAaGAGTGCATCCCATTTGAGGATATGGAATTTTGGCAGTTCCATCAA<br/>CAGGT<br/>ATTGCTGGAGCTGGTACTTGTACTGAAGGGTCCCGTGGGAGGTGGTATC<br/>TTGCGT<br/>AATAAAGATG<br/>&gt;contig109098 length=200 numreads=7<br/>GCAGATGTATCAAAAATTTACAGCCAGGTAGTATTCTHATACAGTTGATTTGC<br/>TGCT<br/>ACGATATATCTTTTCTTCTCACTCTTTAGTATTAATCTAAAGAAACG<br/>CGG<br/>GATATCTTAAGAAATCTGGTCTTATTTCTGGTGAgaCTGGCGAGCAAA<br/>CTGCC<br/>AAATATATTGATGAGTAAT</p>                                                                                                                                                                                                                                                                                                                                                                                             | <p>hypothetical protein FTN_1490 [Francisella novicida U112] &gt;ref WP_003040476.1  hypothetical protein [Francisella novicida]<br/>&gt;gb ABK90357.1  protein of unknown function [Francisella novicida U112]<br/>&gt;gb EDX20130.1  hypothetical protein FTE_0876 [Francisella tularensis subsp. novicida FTE]</p> | 141  | 141  | 89% | 2,00E-39 | 88% | Francisella tularensis subsp. novicida U112, complete genome       | 289  | 89% | 1,00E-74 | 90% |
| <p>&gt;contig80341 length=250 numreads=11<br/>GAAAACAGGCGAGACTGATTCTTAAAAGCTAAGATAACAATTTTACTGACAGGT<br/>GGaGCT<br/>GGTCTGATATAGTCAAGCACAAATGCTATATcAaTACAGGtgATGGTATGG<br/>GTCTA<br/>CCCTTAaGAGTGCATCCCATTTGAGGATATGGAATTTTGGCAGTTCCATCAA<br/>CAGGT<br/>ATTGCTGGAGCTGGTACTTGTACTGAAGGGTCCCGTGGGAGGTGGTATC<br/>TTGCGT<br/>AATAAAGATG<br/>&gt;contig109098 length=200 numreads=7<br/>GCAGATGTATCAAAAATTTACAGCCAGGTAGTATTCTHATACAGTTGATTTGC<br/>TGCT<br/>ACGATATATCTTTTCTTCTCACTCTTTAGTATTAATCTAAAGAAACG<br/>CGG<br/>GATATCTTAAGAAATCTGGTCTTATTTCTGGTGAgaCTGGCGAGCAAA<br/>CTGCC<br/>AAATATATTGATGAGTAAT</p>                                                                                                                                                                                                                                                                                                                                                                                             | <p>succinate dehydrogenase flavoprotein subunit [Francisella sp. TX077308]<br/>&gt;ref WP_013922344.1  succinate dehydrogenase flavoprotein subunit [Francisella sp. TX077308]<br/>&gt;gb AEI35501.1  Succinate dehydrogenase flavoprotein subunit [Francisella sp. TX077308]</p>                                     | 171  | 171  | 87% | 3,00E-48 | 98% | Francisella tularensis subsp. novicida U112, complete genome       | 257  | 87% | 3,00E-65 | 85% |
| <p>&gt;contig109098 length=200 numreads=7<br/>GCAGATGTATCAAAAATTTACAGCCAGGTAGTATTCTHATACAGTTGATTTGC<br/>TGCT<br/>ACGATATATCTTTTCTTCTCACTCTTTAGTATTAATCTAAAGAAACG<br/>CGG<br/>GATATCTTAAGAAATCTGGTCTTATTTCTGGTGAgaCTGGCGAGCAAA<br/>CTGCC<br/>AAATATATTGATGAGTAAT</p>                                                                                                                                                                                                                                                                                                                                                                                                                                                                                                                                                                                                                                                                                                                                   | <p>preprotein translocase subunit SecY [Francisella cf. novicida 3523]<br/>&gt;ref WP_014547570.1  preprotein translocase subunit SecY [Francisella novicida] &gt;gb AEB28102.1  Preprotein translocase secY subunit [Francisella cf. novicida 3523]</p>                                                              | 137  | 137  | 84% | 9,00E-37 | 97% | Francisella tularensis subsp. novicida U112, complete genome       | 193  | 84% | 8,00E-46 | 84% |

|                                                                                                                                                                                                                                                                                                                                                                                                                                                                                                                                                                                                                                                                                                                                                                                                                                                                                                                                                                                                                                                                                                                                                                                                                                                                                                                                                                                                                                                                                                                                                                                                                                                                                                                                        |                                                                                                                                                                                                                                                                                                                                                                                                                                                                                                                                                                                                                                                                                                                                                                                                                                                                                                                                                                                                                                                    |      |      |     |          |     |                                                                     |     |     |          |     |
|----------------------------------------------------------------------------------------------------------------------------------------------------------------------------------------------------------------------------------------------------------------------------------------------------------------------------------------------------------------------------------------------------------------------------------------------------------------------------------------------------------------------------------------------------------------------------------------------------------------------------------------------------------------------------------------------------------------------------------------------------------------------------------------------------------------------------------------------------------------------------------------------------------------------------------------------------------------------------------------------------------------------------------------------------------------------------------------------------------------------------------------------------------------------------------------------------------------------------------------------------------------------------------------------------------------------------------------------------------------------------------------------------------------------------------------------------------------------------------------------------------------------------------------------------------------------------------------------------------------------------------------------------------------------------------------------------------------------------------------|----------------------------------------------------------------------------------------------------------------------------------------------------------------------------------------------------------------------------------------------------------------------------------------------------------------------------------------------------------------------------------------------------------------------------------------------------------------------------------------------------------------------------------------------------------------------------------------------------------------------------------------------------------------------------------------------------------------------------------------------------------------------------------------------------------------------------------------------------------------------------------------------------------------------------------------------------------------------------------------------------------------------------------------------------|------|------|-----|----------|-----|---------------------------------------------------------------------|-----|-----|----------|-----|
| <p>&gt;contig87058 length=236 numreads=10<br/>CAACTTCATTAAACAGTCTTTCTTTAGCTAAAGGTATACGATTGCAAGCCTAAAA<br/>ATAT<br/>GTGTGTCAACAGCATAACAGGTTTACCAAAAGCAGTATTTAAAACTACATTTGC<br/>TGTTT<br/>TACGACCAACACCGCTAGAGATATTAGACTATCAAAATCATCAGGAACAGTACT<br/>ATCAA<br/>ACITTTCTATCAAGTCTTTGCTAGTTTGGATTACATTTTGGCTTTTGTCTTATAT<br/>&gt;contig87142 length=236 numreads=10<br/>TTGAGCCTTTTAAAGAGCAACTGCAAGCACTCTTTAGTGTATTACAaTAGTAT<br/>CACT<br/>TTGCGTAAAAATCCATTTCTTGCTTCATAACCACTTTTGCACCTGTGCGA<br/>GGGC<br/>TAAGTTTTGTAGCGTTTTCAAGTCTTTCCATGAGCTTGGCATTAGATGCTC<br/>GTTG<br/>AGCCATTTCTTAGAGCCACCCCAACCGGATAATCCAACACCTGCTTACT<br/>A</p>                                                                                                                                                                                                                                                                                                                                                                                                                                                                                                                                                                                                                                                                                                                                                                                                                                                                                                                                                                                                                                                                                                    | <p>Endonuclease III [Francisella cf. novicida 3523] &gt;ref WP_014548454.1 <br/>endonuclease III [Francisella novicida] &gt;gb AE26459.1  Endonuclease III [Francisella cf. novicida 3523]</p>                                                                                                                                                                                                                                                                                                                                                                                                                                                                                                                                                                                                                                                                                                                                                                                                                                                     | 146  | 146  | 91% | 7,00E-42 | 91% | Francisella tularensis subsp. novicida U112, complete genome        | 187 | 92% | 4,00E-44 | 81% |
| <p>&gt;contig152880 length=155 numreads=6<br/>GGATTGATTTCTATATCAATATCATCACTCTCTGGTAAATAAACGCCGATG<br/>CAAAAT<br/>GAAGTGTGCTTTTACTGTTGAATCAAAAGGCGACTTTCTTACAAGTCTGTGAA<br/>TACCT<br/>GTCTCGGTGCGTAAACCAACCATTAAGCATATTCACC<br/>&gt;contig94026 length=223 numreads=10<br/>ATAGAGCAAGTCAAAATATCTAGTATATTGAGTATTTCTTTGACCAGATTC<br/>ACCCCT<br/>CTTTCTTAACTCAATAAATTCGGATAAACTGCTGACAGCATTGAAATATAATT<br/>GAGG<br/>CAGAAATATATGGCATCACACCAAGGCAAAATATACTCATTGAGTAAGAGCAC<br/>CACCCAG<br/>AGAACATATTAACATGCTCATCAAAACCCACTGTGCTGATGA<br/>&gt;contig39042 length=466 numreads=20<br/>GTGTTAGAGCATTATAAATGCTATCGGTTGTATTGCGACTTTTATAGTCTTGCTG<br/>ACAA<br/>TTATTGAGAGTAAATTTTTGAAGTGTGGATTGTTATTATAGCTATATCTATA<br/>ATCA<br/>TGTACTGCTGTATAAGGTAATAAAACACTATCTCATAAGAGAAACAAATTTGAC<br/>TATTA<br/>GTGTGTGATGAAGCAATAGTTAGTGGTAAATAGAGGACTAAGCCAAAG<br/>ATTGTTT<br/>TTTTAGTTTCTGATTCATAAAGGAACAATAGAAGCACTACAGTTGGCAAGAAA<br/>TTTTAT<br/>CTGATGATATACTCCAGTATATGTATCTGCAGATGAGAAAAAGATAGCTAAGA<br/>TCAAAG<br/>gACAATGGAAGGGCTAGCTTTTCAGGAAAGCTACTTATTTGAGACCAGTTTA<br/>TAATT<br/>CCTTCATCACTCTATTGTAATAATCTGCATAAAATGATTGCG<br/>&gt;contig82784 length=244 numreads=11<br/>TTGCAGAACACTCTATATGCCAACCTGGCGACCCATGGTGAATCCC<br/>AAGCAG<br/>GTTACCTCTTTAGCACTTTTCAAAGAAACAAAGTCCATAGGATTTTCTTAATA<br/>TCAG<br/>ATATTTCTACTCTGACCTTGTGTAGAGCTTCTATATTGTTACTAAGTTTAC<br/>CAT<br/>AGCCATCAAACCTTACTACAGGATAAAAAACATCACCATTTGGTacttGATGCA<br/>AAAC<br/>CTTT<br/>&gt;contig101992 length=210 numreads=7<br/>ATCACATGAAAATACCACTTTCAAGCTTCTCTGTAATTACATTATATAAGACC<br/>TAGG<br/>TCAACTATATTACAGGATTTCCAGGATCATAAACAGTCTTCTACTGATCCATAC<br/>TGCA<br/>TCCATATAATGAGTACACAGCTTAAATATTACTCTTCTACTGGGTATTTAAC<br/>TACC<br/>TGCTTACTATCGCATCAGCATCTTACCA</p> | <p>3-hydroxyacyl-CoA dehydrogenase [Francisella novicida] &gt;gb ED290840.1  fusion of 3-hydroxyacyl-CoA dehydrogenase and enoyl-CoA hydratase [Francisella novicida FTG]</p> <p>peptide chain release factor 2 [Francisella sp. TX077308] &gt;ref WP_013921950.1  peptide chain release factor 2 [Francisella sp. TX077308] &gt;gb AEI35089.1  Peptide chain release factor 2 [Francisella sp. TX077308]</p> <p>preprotein translocase subunit SecY [Francisella novicida] &gt;gb EDN35612.1  preprotein translocase [Francisella novicida GA99-3549]</p> <p>amino acid transporter [Francisella tularensis subsp. holarctica F92] &gt;ref WP_015083892.1  amino acid transporter [Francisella tularensis] &gt;gb AFX71477.1  amino acid transporter [Francisella tularensis subsp. holarctica F92]</p> <p>cysteinyl-tRNA synthetase [Francisella noatunensis subsp. orientalis str. Toba 04]</p> <p>conserved hypothetical protein [Francisella novicida] &gt;gb EDN36094.1  conserved hypothetical protein [Francisella novicida GA99-3549]</p> | 135  | 135  | 87% | 9,00E-35 | 82% | Francisella tularensis subsp. novicida U112, complete genome        | 150 | 86% | 5,00E-33 | 79% |
|                                                                                                                                                                                                                                                                                                                                                                                                                                                                                                                                                                                                                                                                                                                                                                                                                                                                                                                                                                                                                                                                                                                                                                                                                                                                                                                                                                                                                                                                                                                                                                                                                                                                                                                                        |                                                                                                                                                                                                                                                                                                                                                                                                                                                                                                                                                                                                                                                                                                                                                                                                                                                                                                                                                                                                                                                    | 94.0 | 94.0 | 84% | 1,00E-21 | 98% | Francisella tularensis subsp. novicida U112, complete genome        | 137 | 77% | 3,00E-29 | 84% |
|                                                                                                                                                                                                                                                                                                                                                                                                                                                                                                                                                                                                                                                                                                                                                                                                                                                                                                                                                                                                                                                                                                                                                                                                                                                                                                                                                                                                                                                                                                                                                                                                                                                                                                                                        |                                                                                                                                                                                                                                                                                                                                                                                                                                                                                                                                                                                                                                                                                                                                                                                                                                                                                                                                                                                                                                                    | 145  | 145  | 85% | 1,00E-39 | 99% | Francisella tularensis subsp. tularensis WY96-3418, complete genome | 257 | 85% | 3,00E-65 | 88% |
|                                                                                                                                                                                                                                                                                                                                                                                                                                                                                                                                                                                                                                                                                                                                                                                                                                                                                                                                                                                                                                                                                                                                                                                                                                                                                                                                                                                                                                                                                                                                                                                                                                                                                                                                        |                                                                                                                                                                                                                                                                                                                                                                                                                                                                                                                                                                                                                                                                                                                                                                                                                                                                                                                                                                                                                                                    | 233  | 233  | 92% | 7,00E-71 | 74% | Francisella tularensis subsp. tularensis WY96-3418, complete genome | 207 | 91% | 6,00E-50 | 75% |
|                                                                                                                                                                                                                                                                                                                                                                                                                                                                                                                                                                                                                                                                                                                                                                                                                                                                                                                                                                                                                                                                                                                                                                                                                                                                                                                                                                                                                                                                                                                                                                                                                                                                                                                                        |                                                                                                                                                                                                                                                                                                                                                                                                                                                                                                                                                                                                                                                                                                                                                                                                                                                                                                                                                                                                                                                    | 161  | 161  | 83% | 3,00E-45 | 86% | Francisella cf. novicida 3523, complete genome                      | 251 | 99% | 2E-63    | 83% |
|                                                                                                                                                                                                                                                                                                                                                                                                                                                                                                                                                                                                                                                                                                                                                                                                                                                                                                                                                                                                                                                                                                                                                                                                                                                                                                                                                                                                                                                                                                                                                                                                                                                                                                                                        |                                                                                                                                                                                                                                                                                                                                                                                                                                                                                                                                                                                                                                                                                                                                                                                                                                                                                                                                                                                                                                                    | 135  | 135  | 94% | 4,00E-38 | 84% | Francisella tularensis TIGB03, complete genome                      | 178 | 87% | 2,00E-41 | 82% |



|                                                                                                                                                                                                                                                                                                                                                                                          |                                                                                                                                                                                                                                                                              |      |      |     |          |     |                                                                      |     |     |          |     |
|------------------------------------------------------------------------------------------------------------------------------------------------------------------------------------------------------------------------------------------------------------------------------------------------------------------------------------------------------------------------------------------|------------------------------------------------------------------------------------------------------------------------------------------------------------------------------------------------------------------------------------------------------------------------------|------|------|-----|----------|-----|----------------------------------------------------------------------|-----|-----|----------|-----|
| <p>&gt;contig71088 length=275 numreads=10<br/> AATGCTTGCACAGCACCTATATCACACCAATAGAGCTAAAGTTTGC AAAAGAAA<br/> CCAAAG<br/> AAAAGTATATAACGGCTTTGGTATGCTCAGAAATTTCTGTAGAATGCTTTGCTA<br/> AATCT<br/> TGCAATTGCAACAAATTCATTTGTAACAATCTTTGTACCCATTATCTGGCTTGAAAG<br/> CATC<br/> ACCTCATTACCATGAATATTTAAAACCCATGCCAAAGGATAaaaTACATACCCCTAT<br/> AATT<br/> TGGGTAAACGTAATGCCGATGACATGTGAAAAAAT</p> | <p>Nucleoside permease nupC [Francisella cf. novicida 3523] &gt;ref WP_014548943.1 <br/> nucleoside permease [Francisella novicida] &gt;gb AEE26966.1  Nucleoside permease nupC [Francisella cf. novicida 3523]</p>                                                          | 159  | 159  | 91% | 1,00E-44 | 80% | Francisella tularensis subsp. holarctica PHIT-FT049, complete genome | 165 | 86% | 2,00E-37 | 78% |
| <p>&gt;contig195357 length=112 numreads=7<br/> ATATTTATttttAGATTACCTCCTGGTACGGGTGATATACAACAAATTTCAA<br/> AAA<br/> ATATGCCTGTTACAGGAGCTGTAATTGTAACACTACaCcACAAGATTTATCCTT</p>                                                                                                                                                                                                             | <p>sodium:proton antiporter [Francisella philomiragia] &gt;gb EET21499.1  conserved hypothetical protein [Francisella philomiragia subsp. philomiragia ATCC 25015]</p>                                                                                                       | 75.5 | 75.5 | 81% | 3,00E-15 | 97% | Francisella tularensis TIGB03, complete genome                       | 130 | 79% | 3,00E-27 | 88% |
| <p>&gt;contig132323 length=174 numreads=8<br/> GCTTCATTATGTATTGTTGGTCTTTTCATGTTTTTCGGTGCATAAGCTTGATATAT<br/> GCC<br/> TCTGTGCATGCAACCGCTTTGcAAaTAATACTTACAAAACTAATTgTTtAGATGTT<br/> AGT<br/> TTAGTAGCCATAGATTAATAATAGAAACAAATTTAATACTAGTAATTATATCAGC</p>                                                                                                                                 | <p>phage terminase small subunit [Francisella philomiragia subsp. philomiragia ATCC 25017] &gt;ref WP_012280385.1  terminase [Francisella philomiragia] &gt;gb AB287210.1 <br/> phage terminase, small subunit [Francisella philomiragia subsp. philomiragia ATCC 25017]</p> | 91.7 | 91.7 | 56% | 2,00E-21 | 95% | Francisella cf. novicida 3523, complete genome                       | 222 | 73% | 1,00E-54 | 90% |
